# Supplementary material for: Transcriptional Profiling of Human Liver Identifies Sex-Biased Genes Associated with Polygenic Dyslipidemia and Coronary Artery Disease
Source: PLoS One. 2011 Aug 12;6(8):e23506. doi: 10.1371/journal.pone.0023506 (PMC3155567; doi:10.1371/journal.pone.0023506)
Supplement: Table S4 — Biological functions (A), canonical pathways (B) and networks (C) associated with human liver sex-biased genes identified by Ingenuity Pathway analysis. (XLS) [file pone.0023506.s008.xls]

## Sheet: Table S4A
Table S4A - Biological function (including diseases and disorders, molecular and cellular function, physiological system and development function) associated with human liver sex-biased genes as identified by Ingenuity Pathway Analysis (IPA)
Category	p-value	Molecules
Cardiovascular Disease	2.56E-05-4.84E-02	AGPAT5,PDPK1,ADD1,ALDH5A1,APCS,AGGF1,AMOTL1,ANGPTL4,ANK1,ANK3,APOA5,AQP6,RSRC1,ASPH,ATG3,ABCA1,BBX,BMPR1B,BMPR2,BRD3,BPTF,CLMN,CREB5,CLIP1,CNDP1,CBL,CTNNA3,CD59,CXCR7,CHRM2,CHRM3,C1orf96,C14orf153,C20orf12,C6orf204,CGNL1,CLDN1,CCDC132,COL15A1,CNTN3,CNTNAP2,CCND1,CDK14,CSTA,CYP1A2,CYP3A5,CYP7A1,DGAT1,DGAT2,DPP6,DLG2,DUSP10,DST,EP300,EVC2,EPHB1,ETV6,FAM108C1,FDFT1,FAF2,FGB,FGF7,FKBP1B,FOXO1,FOSL1,F…
Genetic Disorder	2.62E-05-5E-02	COL14A1,MTMR9,EPHB1,SAFB,SLC24A4,SORL1,MED1,SUSD4,TECTA,ZEB1,GSTCD,NRXN1,ALCAM,RUNX1,SETD2,DPYS,APOA4,DAPK2 (includes EG:23604),VAT1L,IQGAP2,ALPK2,GPC6,KPNA3,KAL1,TK2,CSTB,MYO5A,GPAM,AGPAT5,ONECUT2,PPARA,RAB14,LHX2,EML4,EDA,ETV1,INA,PCDHGA3,PPFIBP1,PGR,ANKRD50,SMC1A,COQ6,RASSF8,SESN3,SMG6,H19,CEP68,H6PD,SGCB,FYB,WAC,PIK3R3,BMPR1B,IGF2,AKR1B10,TNS1,PARD3B,NOS1,HPS5 (includes EG:11234),TPM1,RAB3B,M…
Endocrine System Disorders	4.51E-05-3.04E-04	DPYSL2,PAPPA2 (includes EG:60676),LIPC,ITSN1,GMDS,DLG2,CREB5,C5ORF58,MYLK,EPHB1,TTLL7,SPTLC2,C20ORF94,HNF4A,PRKD3,CHRM2,CNDP1,SLC24A4,SORL1,PYROXD2,C6ORF204,SCN9A,SEPT7,SSTR1,ZEB1,C9ORF102,NRXN1,KANK4,SCRN1,ZNF385B,MIB1,TNR,ST6GAL2,CRYBG3,ALCAM,RUNX1,SETD2,MAGI3,ANK3,NEBL,ASXL3,DAPK2 (includes EG:23604),CTNNA3,LRP6,TSGA10,SPATA13,VAT1L,GNA14,PRKG1,LRRC58,VCAN,XYLB,IQGAP2,RIF1,IGF1,RYBP,FGD4,STX18…
Metabolic Disease	4.51E-05-4.84E-02	DPYSL2,PAPPA2 (includes EG:60676),LIPC,ITSN1,GMDS,DLG2,CREB5,CCND1,C5ORF58,MYLK,GNPTAB,EPHB1,TTLL7,SPTLC2,C20ORF94,HNF4A,PRKD3,HADHA,CHRM2,CNDP1,SLC24A4,SORL1,PYROXD2,C6ORF204,SCN9A,SEPT7,SSTR1,ZEB1,HMOX2,C9ORF102,NRXN1,KANK4,SCRN1,ZNF385B,MIB1,TNR,GALK1,ST6GAL2,CRYBG3,ALCAM,RUNX1,FGA,SETD2,MAGI3,ANK3,NEBL,ASXL3,DAPK2 (includes EG:23604),CTNNA3,LRP6,TSGA10,SPATA13,VAT1L,GNA14,PRKG1,LRRC58,VCAN,XY…
Lipid Metabolism	1.03E-04-4.84E-02	PPARA,LIPC,APOA4,MTMR9,APOC4,BCO2,NR2F2,NF2,PLA1A,CYP3A5,ABCA1,PGR,CYP17A1,FDFT1,CYP1A2,IGF1,SPTLC2,PHYH,CYP7A1,UGT2B17,SMG1,LPP,HNF4A,FGF7,PNPLA4,ABCB1,PNPLA3,CNTFR,PLA2G1B,DGAT2,APOA5,STS,GPAM,IGF2,UCP3,ADH7,LDLR,PI4K2A,CYP3A4,AKR1B10,UGT2B15,DGAT1
Small Molecule Biochemistry	1.03E-04-4.84E-02	PPARA,SIK3,LIPC,GMDS,MTMR9,APOC4,NR2F2,NF2,PDPK1,PLA1A,ABCA1,CYP3A5,PGR,MYLK,PKN2,SRP72,GPX3,FDFT1,CYP1A2,SPTLC2,PRKY,SMG1,RET,HNF4A,PRKD3,CHRM2,MAP3K2,MAPK4,PNPLA3,APOA5,SNRK,FYB,ALDH9A1,BMPR1B,ADH7,IGF2,PI4K2A,AKR1B10,MAP4K5,NOS1,DYRK2,APOA4,DAPK2 (includes EG:23604),BCO2,PRKG1,CYP17A1,IGF1,SLC25A12,PHYH,CYP7A1,UGT2B17,LPP,SULF2,FGF7,PNPLA4,TSTA3,ABCB1,CNTFR,DGAT2,PLA2G1B,STS,GPAM,UCP3,LDLR,CYP…
Endocrine System Development and Function	2.31E-04-4.84E-02	CYP17A1,CYP1A2,CYP3A4,UGT2B17,CYP3A5,ALDH9A1,PGR
Neurological Disease	4.97E-04-3.58E-02	DPYSL2,COL14A1,MICALCL,MTMR9,TSPAN13,CREB5,CABIN1,PTPRC,GPCPD1,OXR1,SAFB,HNF4A,PGRMC1,CHRM2,FBXO9,SLC24A4,SORL1,PYROXD2,TMTC1,RHOBTB3,AGXT2L1,SUSD4,TECTA,KLF13,HMOX2,AEN,NRXN1,GSTCD,MIB1,ST6GAL2,ALCAM,CYCS (includes EG:54205),RUNX1,ANK3,APOA4,VAT1L,KIAA1549,PRKG1,CGNL1,ALKBH8,IQGAP2,TNMD,ASPH,TLR3,ALDH5A1,MOBKL2B,KPNA3,PHF6,ABCB1,DST,CNTFR,GDAP1,CSTB,ZFPM2,LDLR,ERVWE1,AK3L1,STAG2,PPARA,NDST3,RAB1…
Connective Tissue Development and Function	5.52E-04-4.84E-02	COL14A1,BMP2,CREBBP,BMPR2,CCND1,VCAN,NCOA3,PGR,PTPRC,IGF2,BMPR1B,IGF1,KL,FGF7
Molecular Transport	5.52E-04-2.47E-02	ABCB1,APOA4,LIPC,PLA2G1B,APOA5,RALBP1,ABCA1,FDFT1,IGF2,CYP3A4,IGF1,CYP7A1,DGAT1,CHRM2,PNPLA4
Cell Morphology	7.65E-04-4.84E-02	DPYSL2,CBL,IGF1,REST,BMP2,NF2,KRAS,P2RX7,TAOK1,RET,SNCA,PGR
Cancer	8.04E-04-5E-02	DPYSL2,HNRNPH1,MYH10,KRAS,CCND1,ZBTB40,CYP3A5,PTPRC,TFF1,MPHOSPH8,APCS,EIF1AX,FOSL1,HNF4A,TMEM97,VSTM2L,CHRM2,ALDOC,NKTR,TECTA,ZEB1,RUNX1T1,MIB1,ALCAM,CYCS (includes EG:54205),RUNX1,ANK3,DYRK2,DPYS,SAFB2,KLHL20,IFIT1,TET2,TLR3,ASPH,ALDH5A1,KPNA3,ABCB1,DST,DGAT2,GDAP1,HIP1,XIST,CPEB4,ZFPM2,GPX2,XAF1,FOXN2,PPARA,RAB14,PTH2R,KLF6,PDPK1,ETV1,CSPP1,PGR,STK4,FDFT1,GPX3,PDE11A,H19,YWHAE,ANGPTL1,MLL,NCOA…
Hematological Disease	8.04E-04-3.58E-02	PPARA,PIK3CA,LIPC,PTH2R,HDAC9 (includes EG:9734),PDPK1,KRAS,CCND1,ETV6,FDFT1,JUN,TET2,FGB,RET,PDE11A,LPP,PPP3CA,ABCB1,MYCN,IL3RA,P2RX7,MLL,GHR,RUNX1T1,CBL,FOXO1,PTPN11,CYP3A4,TUBE1,RUNX1,EIF2AK2,FGA
Gene Expression	1.3E-03-4.84E-02	PPARA,TRIP11,ITSN1,REST,JMJD1C,MLLT6,DIRAS3,KLF6,NR2F2,ZNF74,PBX1,ETV1,PDPK1,KRAS,CREB5,CCND1,PGR,TFF1,THRAP3,RORA,CCNK,PPM1A,FOSL1,HNF4A,KDM5C,FST,YWHAE,MED1,MYST4,CREBBP,NR2C2,RBM9,ZEB1,KLF13,CCRN4L,NCOA3,MLL,SP4,MNT,RUNX1T1,CCND3,CBL,SUPT16H,GRLF1,STAT2,RUNX1,ADCYAP1,KDM5B,RBAK,RBM25 (includes EG:58517),NFIX,PA2G4,BMP2,LRP6,HDAC9 (includes EG:9734),BMPR2,GTF2A1,MLL5,PRKG1,ETV6,EP300,ZBTB38,APP…
Cellular Function and Maintenance	1.33E-03-1.9E-02	CYTH2,IGF2,SORL1,CBL,LDLR,ITSN1,IGF1,APOA5,HIP1,GAPVD1,SNCA
Drug Metabolism	1.33E-03-4.84E-02	CYP17A1,ABCB1,CYP1A2,CYP3A4,APOA5,UGT2B17,SULF2,CYP3A5,PGR
Vitamin and Mineral Metabolism	1.33E-03-3.58E-02	ADH7,CYP1A2,APOA4,CYP3A4,AKR1B10,BCO2,UGT2B15,UGT2B17,STS,CYP3A5,ABCA1,PGR
Developmental Disorder	2.2E-03-2.47E-02	TPM1,MYH10,OFD1,FMR1,BMP2,PRSS12,EDA,KRAS,CCND1,SMC1A,EP300,EVC,FDFT1,CEP290,GABRB3,C7ORF11,IGF1,NIPBL,RET,KDM5C,ALDOC,PHF6,ARSE,H19,YWHAE,SLC26A2,EVC2,CREBBP,ATRX,KAL1,SSTR1,OPHN1,BMPR1B,GHR,PTPN11,TRAPPC2,SLC3A1,IL1RAPL1
Carbohydrate Metabolism	2.55E-03-4.84E-02	TSTA3,DYRK2,ABCB1,GMDS,MTMR9,PLA2G1B,NF2,APOA5,GYG2,PLA1A,RALBP1,CYP3A5,IGF2,UCP3,IGF1,CYP3A4,SLC25A12,ST6GAL2,AKR1B10,SMG1,LPP,SULF2,FGF7
Cell Death	2.55E-03-4.84E-02	DAPK2 (includes EG:23604),BMP2,HDAC9 (includes EG:9734),MYH11,ETV6,CABIN1,PGR,STK4,JUN,WTAP,IGF1,TRIB2,TNFRSF10A (includes EG:8797),DUT (includes EG:1854),CD59,GGT1,MLL,FKBP1B,IGF2,RUNX1T1,XAF1,RUNX1,EIF2AK2,BCL2L11,LGALS1
Cellular Assembly and Organization	2.55E-03-4.25E-02	DPYSL2,TPM1,CYTH2,REST,DST,NF2,PDPK1,MPP7,DOCK7 (includes EG:85440),PRKG1,KLHL20,NRXN1,PGR,PLEK2,TLN2,IGF1,CLDN1,GRLF1,SMARCC1
Cellular Development	2.55E-03-4.84E-02	DPYSL2,TPM1,CSTA,MLLT6,BMP2,NF2,BMPR2,MYH11,TAOK1,CCND1,ETV6,KLHL20,EP300,PGR,PKN2,PTPRC,DMTF1,JUN,IGF1,GFRA1,RET,FGF7,CREBBP,SNRK,P2RX7,NCOA3,MLL,BMPR1B,IGF2,RUNX1T1,CBL,CCND3,ERVWE1,RUNX1,LGALS1
Nervous System Development and Function	2.55E-03-1.54E-02	DPYSL2,IGF1,REST,BMP2
Cell Cycle	2.75E-03-4.84E-02	KDM5B,ITSN1,BMP2,KRAS,MLL5,GOLGA2,CHRM3,CCND1,EP300,SMC1A,IGF1,JUB,FGF7,MYCN,H19,GPN3,CREBBP,SSTR1,CDK14,NCOA3,IGF2,CCND3,MXD4,CYLD,CLIP1
Cell-To-Cell Signaling and Interaction	2.75E-03-4.84E-02	BMP2,CTNNA3,NF2,ZEB1,MPP7,NRXN1,PKN2,GHR,TLN2,IGF1,CLDN1,GRLF1,TLR3
Cellular Growth and Proliferation	2.75E-03-4.84E-02	KLF6,NF2,PDPK1,KRAS,GOLGA2,CCND1,SMC1A,PGR,PTPRC,FDFT1,RORA,RET,HNF4A,PFKFB3,ESPL1,FST,MED1,ZBED1,NR2C2,CDK14,ATAD2,NCOA3,IGF2,RUNX1T1,CCND3,PTPN11,RUNX1,PIK3CA,BMP2,LRP6,BMPR2,CHRM3,ETV6,VCAN,EP300,DMTF1,JUN,IGF1,GFRA1,UGT2B17,PURA,FGF7,GPN3,RBM5,FKBP1B,GHR,FOXO1,UGT2B15,ERVWE1,NEDD9,LGALS1
Dermatological Diseases and Conditions	2.75E-03-2.47E-02	CYP17A1,CYP3A4,LAMB3,LAMA3,PPP3CA
Hematological System Development and Function	2.75E-03-4.84E-02	PTPRC,JUN,RUNX1T1,IGF1,MYH11,SNRK,RUNX1
Hematopoiesis	2.75E-03-4.84E-02	JUN,RUNX1T1,IGF1,BMP2,MYH11,SNRK,RUNX1
Inflammatory Disease	2.75E-03-4.84E-02	PPARA,MTUS2,ITSN1,GMDS,CSNK1G1,LHX2,TGFBR3,CMTM4,PBX1,DLG2,CREB5,TMEM217,ANK1,MYLK,FDFT1,SPTLC2,CGN,NIPBL,C1ORF168,CHRM2,RASSF8,SUSD3,ADAMTSL3,SLC24A4,GUCY1A3,C6ORF204,MYST4,ULK4,CREBBP,SLC25A37,CDK14,ZEB1,CNTNAP2,GSN,ZC3H18,PIK3R3,PPP1R12B,ALCAM,DPP6,CYLD,SSFA2,RUNX1,PARD3B,MAGI3,TMTC3,NEBL,ASXL3,RBM47,CTNNA3,LRP6,HDAC9 (includes EG:9734),UBE2W,ODZ3,PTPLB,CHRM3,PRKG1,ETV6,KLHL20,MIER1,CYP17A1,RI…
Nucleic Acid Metabolism	2.75E-03-2.74E-02	TSTA3,DPYSL2,SLC23A2,DPYS,DUT (includes EG:1854),GMDS,TK2
Skeletal and Muscular System Development and Function	2.75E-03-2.76E-02	EVC,ARSE,BMPR1B,IGF2,GHR,IGF1,KL,TRAPPC2,BMP2,CREBBP,BMPR2,SPP2
Gastrointestinal Disease	2.83E-03-5E-02	GMDS,ITSN1,CMTM4,TGFBR3,DLG2,CREB5,CCND1,MYLK,PLEK2,SPTLC2,HNF4A,CHRM2,TMEM97,SLC24A4,C6ORF204,GUCY1A3,SLC26A2,MYST4,CREBBP,SSTR1,ZEB1,ZC3H18,ST6GAL2,ALCAM,RUNX1,MAGI3,SQLE,NEBL,DPYS,PIK3CA,ASXL3,RBM47,CTNNA3,LRP6,UBE2W,GNA14,ABCA5,ODZ3,PRKG1,KLHL20,EP300,JUN,RIF1,IGF1,TET2,RTTN,ASPH,ALPK2,LPP,GPC6,PPP3CA,MOBKL2B,ABCB1,CNTFR,CPEB4,SOX6,ONECUT2,GPX2,PPARA,NEURL,MTUS2,LHX2,CSNK1G1,INSIG1,KLF6,PBX1,…
Reproductive System Disease	2.97E-03-4.8E-02	MALAT1,MYH10,RAB14,DIRAS3,CMTM4,KLF6,CCND1,CYP3A5,PGR,GPX3,FDFT1,STK4,MPHOSPH8,DHTKD1,SMG1,RET,PDE11A,CHRM2,VSTM2L,PEG3,ARSE,TBC1D2B,H19,SSTR1,ZEB1,PIK3R3,BMPR1B,IGF2,CBL,TUBE1,BAT2L2,DYRK2,PIK3CA,DPYS,BMPR2,HDAC9 (includes EG:9734),POPDC2,ABCA5,USP2,CHRM3,VCAN,EP300,CYP17A1,IFIT1,TTC37,MUM1L1,JUN,IGF1,RHOU,UGT2B17,ASPH,PURA,ALDH5A1,HOXD11,KPNA3,ABCB1,RSF1,DST,DDX24,P2RX7,XIST,SNAP25,ZNF148,ZFPM2…
Ophthalmic Disease	4.29E-03-4.84E-02	SNAP25,CHRM3,CHRM2
Renal and Urological Disease	4.29E-03-3.58E-02	COL4A5,MYH10,COL4A4 (includes EG:1286),SNAP25,CHRM3,CHRM2
Immunological Disease	7.95E-03-4.48E-02	DPYSL2,COL14A1,UBE2H (includes EG:7328),LIPC,GMDS,REST,DLG2,KRAS,CREB5,CCND1,MYLK,PTPRC,GNPTAB,EPHB1,SAFB,PRKD3,CHRM2,CNDP1,ARHGEF4,SLC24A4,SORL1,C6ORF204,SCN9A,CMYA5 (includes EG:202333),KLF13,NRXN1,KANK4,ZNF385B,CRYBG3,ALCAM,RUNX1,SNCA,MAGI3,ABCA13,ANK3,NEBL,SQLE,DPYS,CLEC12A,CTNNA3,LRP6,TSGA10,GNA14,ODZ3,ANKRD12,PRKG1,FCHO2,LRRC58,VCAN,ALKBH8,IQGAP2,JUN,IGF1,TAF3,STX18,TLR3,ZCCHC6,KIAA1109,LPP…
Organismal Injury and Abnormalities	7.95E-03-7.95E-03	IGF1,FGF7
Renal and Urological System Development and Function	7.95E-03-7.95E-03	MLL5,CCND1
Reproductive System Development and Function	7.95E-03-3.58E-02	KDM5B,FKBP1B,IGF2,IGF1,SSTR1,KRAS,CHRM3,EP300
Respiratory System Development and Function	7.95E-03-7.95E-03	CCND3,CCND1
Tissue Development	7.95E-03-4.84E-02	PKN2,PTPRC,BMPR1B,COL14A1,CTNNA3,NF2,BMPR2,ZEB1
Hepatic System Disease	1.02E-02-3.58E-02	PPARA,LIPC,HDAC9 (includes EG:9734),TUFT1,GNA14,PTPRC,CYP7A1,TLR3,PDE11A,HNF4A,LPP,RET,ZNF207,PPP3CA,MORC1,CNTFR,CCDC38,DGAT2,SLCO1A2,GGT1,LDLR,ST6GAL2,GPX2,UGT2B15,DGAT1,C20ORF194
Nutritional Disease	1.06E-02-1.06E-02	PPARA,UCP3,IGF2,LDLR,LIPC,APOA4,CYP7A1,NCOA3,PGR
Post-Translational Modification	1.31E-02-3.94E-02	SIK3,DYRK2,DAPK2 (includes EG:23604),PDPK1,PRKG1,PKN2,SRP72,MYLK,PTPRC,IGF1,PRKY,RET,PRKD3,MAP3K2,MAPK4,MYST4,CREBBP,SNRK,FYB,BMPR1B,IGF2,CYCS (includes EG:54205),MAP4K5,EIF2AK2,SNCA
Organismal Development	1.33E-02-3.94E-02	H19,FST,TGFBR3,EVI5,ZNF74,HDAC9 (includes EG:9734),GSN,RPS4Y1,KLHL20,VCAN,MLL,RPS4X,IGF2,BMPR1B,CBL,AGGF1,MNT,IGF1,RYBP,TRIM14,RUNX1,FGF7
Psychological Disorders	1.4E-02-1.54E-02	DPYSL2,MICALCL,KPNA6,GMDS,ITSN1,QKI,MTMR9,DLG2,FAM115A,CREB5,ATP11B,CABIN1,MPDZ,C7ORF11,TTLL7,HYDIN,CHRM2,FBXO9,SLC24A4,SORL1,PYROXD2,PGM3,TMTC1,SCN9A,ACBD5,SSTR1,SUSD4,TECTA,KLF13,GSTCD,NRXN1,SCRN1,SNCA,ANK3,APOA4,CTNNA3,KIAA1549,GNA14,ODZ3,ALKBH8,IGF1,TTC39C,CLMN,ALDH5A1,PPP3CA,DNAH6,MOBKL2B,KPNA3,ABCB1,DGAT2,PFN2,P2RX7,AK3L1,DGAT1,PPARA,NDST3,LRP4,STRN,MTUS2,UPF3A,EML4,PTH2R,EDA,ZNF74,NID1,ABC…
Cellular Compromise	1.54E-02-1.54E-02	GSN,VIL1
Connective Tissue Disorders	1.54E-02-1.54E-02	KL,SAMD9
DNA Replication, Recombination, and Repair	1.54E-02-4.48E-02	POLD3,SMARCC1,PURA,ORC4L,PGR,EP300
Amino Acid Metabolism	2.17E-02-2.17E-02	SIK3,DYRK2,DAPK2 (includes EG:23604),MAPK4,PDPK1,SNRK,FYB,PRKG1,SRP72,PKN2,MYLK,BMPR1B,IGF1,PRKY,EIF2AK2,MAP4K5,RET,PRKD3,MAP3K2
Cellular Movement	2.21E-02-4.84E-02	TFF2,TFF1,PTPN11,IGF1,FOSL1,GSN,FGA,LPP,CCND1
Infectious Disease	2.47E-02-2.47E-02	CYP17A1,CYP3A4
Respiratory Disease	2.47E-02-3.58E-02	MALAT1,BMPR1B,BMPR2,KRAS,RET,ASCL1
Cardiovascular System Development and Function	3.58E-02-3.58E-02	CBL,KLHL20
Skeletal and Muscular Disorders	3.58E-02-3.58E-02	FDFT1,PTH2R
Embryonic Development	3.94E-02-4.08E-02	JUN,IGF1,BMP2,ERVWE1
Energy Production	4.84E-02-4.84E-02	CYP3A4,CYP3A5
RNA Post-Transcriptional Modification	4.84E-02-4.84E-02	CELF6,RBM5
Tumor Morphology	4.84E-02-4.84E-02	MYCN,EP300

## Sheet: Table S4B
Table S4B - Canonical pathways associated with human liver sex-biased genes as identified by Ingenuity Pathway Analysis (IPA)
Ingenuity Canonical Pathways	-log(p-value)	Ratio	Molecules
TR/RXR Activation	3.29	0.144	PIK3CA,RAB3B,MED1,APOA5,NCOA3,EP300,PIK3R3,UCP3,LDLR,TBL1Y,CYP7A1,TBL1XR1,FGA
PTEN Signaling	3.14	0.127	PIK3CA,BMPR2,PDPK1,KRAS,CNKSR3,CCND1,PIK3R3,BMPR1B,GHR,CBL,FOXO1,BCL2L11,MAGI3
Cyanoamino Acid Metabolism	2.4	0.238	GGT3,GGTLC1,KL,GGTLC2,GGT1
Fructose and Mannose Metabolism	2.32	0.157	TSTA3,PFKFB3,SORD,GMDS,UGT2A3,GALK1,AKR1B10,ALDOC
Arachidonic Acid Metabolism	2.21	0.115	GGT3,PNPLA3,BCO2,GGTLC2,PLA2G1B,GGT1,CYP3A5,GPX3,GGTLC1,CYP1A2,CYP3A4,GPX2,CYP4X1
Taurine and Hypotaurine Metabolism	2.19	0.267	GGT3,GGTLC1,GGTLC2,GGT1
LXR/RXR Activation	2.02	0.118	IL1F9,APOA4,LDLR,C20ORF191,APOC4,CYP7A1,APOA5,TLR3,ABCA1
Glycerolipid Metabolism	1.93	0.115	GPAM,AGPAT5,ADH7,LIPC,PNPLA3,UGT2A3,AKR1B10,DGAT2,DGAT1,ALDH5A1,ALDH9A1
Î²-alanine Metabolism	1.83	0.14	CNDP1,DPYSL2,DPYS,IVD,ALDH5A1,ALDH9A1,HADHA
Aryl Hydrocarbon Receptor Signaling	1.72	0.0942	TRIP11,NFIX,MED1,CCND1,ALDH9A1,NCOA3,EP300,CYP1A2,JUN,CCND3,TFF1,NFIA,ALDH5A1
Prostate Cancer Signaling	1.69	0.101	PIK3R3,PIK3CA,FOXO1,PA2G4,CREBBP,PDPK1,KRAS,CREB5,CCND1
PXR/RXR Activation	1.67	0.119	PPARA,ABCB1,CYP1A2,FOXO1,CYP3A4,CYP7A1,HNF4A,CYP3A5
Pantothenate and CoA Biosynthesis	1.59	0.182	DPYSL2,DPYS,PANK3,ENPP2
Bile Acid Biosynthesis	1.58	0.136	ADH7,CYP3A4,CYP7A1,ALDH5A1,ALDH9A1,HADHA
FLT3 Signaling in Hematopoietic Progenitor Cells	1.56	0.113	PIK3R3,PIK3CA,CBL,PTPN11,PDPK1,STAT2,KRAS,CREB5
PPAR Signaling	1.53	0.0968	PPARA,IL1F9,JUN,C20ORF191,MED1,CREBBP,KRAS,CITED2,EP300
Glutathione Metabolism	1.47	0.119	GPX3,GGT3,GGTLC1,GGTLC2,GPX2,H6PD,GGT1
Estrogen-Dependent Breast Cancer Signaling	1.44	0.108	PIK3R3,PIK3CA,JUN,IGF1,KRAS,CREB5,CCND1
GM-CSF Signaling	1.37	0.106	PIK3R3,PIK3CA,PTPN11,KRAS,RUNX1,CCND1,PPP3CA
Fatty Acid Metabolism	1.36	0.0962	ADH7,CYP1A2,CYP3A4,CPT2,CYP4X1,IVD,ALDH5A1,ALDH9A1,HADHA,CYP3A5
Xenobiotic Metabolism Signaling	1.35	0.0769	ABCB1,PIK3CA,FMO2,MED1,CREBBP,KRAS,DSEL,CYP3A5,ALDH9A1,EP300,PIK3R3,CYP1A2,CES8,CYP3A4,UGT2B15,UGT2B17,PPP2R1B,ALDH5A1,CITED2,MAP3K2
IGF-1 Signaling	1.34	0.0947	PIK3R3,PIK3CA,JUN,IGF1,FOXO1,PTPN11,YWHAE,PDPK1,KRAS
Growth Hormone Signaling	1.34	0.106	PIK3R3,IGF2,PIK3CA,GHR,IGF1,PDPK1,ONECUT1
Docosahexaenoic Acid (DHA) Signaling	1.33	0.125	PIK3R3,PIK3CA,FOXO1,CYCS (includes EG:54205),PDPK1
Selenoamino Acid Metabolism	1.33	0.132	GGT3,GGTLC1,GGTLC2,GGT1,SCLY
TGF-Î² Signaling	1.32	0.0964	BMPR1B,JUN,BMP2,CREBBP,BMPR2,KRAS,HNF4A,EP300
Non-Small Cell Lung Cancer Signaling	1.28	0.0959	PIK3R3,STK4,PIK3CA,PA2G4,PDPK1,KRAS,CCND1
Nur77 Signaling in T Lymphocytes	1.24	0.102	CYCS (includes EG:54205),HDAC9 (includes EG:9734),PPP3CA,CABIN1,MAP3K2,EP300
Estrogen Receptor Signaling	1.22	0.0862	TAF7L (includes EG:54457),MED1,CREBBP,TAF3,KRAS,RBM9,GTF2A1,NCOA3,PGR,EP300
ERK5 Signaling	1.22	0.101	PTPN11,YWHAE,MEF2A (includes EG:4205),KRAS,FOSL1,CREB5,MAP3K2
Neurotrophin/TRK Signaling	1.22	0.1	PIK3R3,PIK3CA,JUN,PTPN11,PDPK1,KRAS,CREB5
EIF2 Signaling	1.21	0.0889	PABPC1,PIK3R3,PIK3CA,EIF1AX,PDPK1,KRAS,EIF2AK2,EIF2S1
Huntington's Disease Signaling	1.21	0.0739	PIK3CA,REST,CREBBP,GNB5,PDPK1,HDAC9 (includes EG:9734),HIP1,CREB5,SNAP25,EP300,PIK3R3,HSPA4,JUN,IGF1,C20ORF191,CYCS (includes EG:54205),SNCA
LPS/IL-1 Mediated Inhibition of RXR Function	1.21	0.0761	PPARA,ABCB1,LIPC,FMO2,APOC4,SLCO1A2,DSEL,CYP3A5,ALDH9A1,ABCA1,JUN,CYP3A4,CPT2,CYP7A1,ALDH5A1
Lymphotoxin Î² Receptor Signaling	1.21	0.107	PIK3R3,PIK3CA,CREBBP,CYCS (includes EG:54205),PDPK1,EP300
Antiproliferative Role of Somatostatin Receptor 2	1.19	0.0972	NOS1,PIK3R3,PIK3CA,GUCY1A3,PTPN11,GNB5,KRAS
Prolactin Signaling	1.19	0.0972	PIK3R3,PIK3CA,JUN,PTPN11,CREBBP,KRAS,EP300
Renal Cell Carcinoma Signaling	1.19	0.1	PIK3R3,PIK3CA,JUN,PTPN11,CREBBP,KRAS,EP300
Cardiomyocyte Differentiation via BMP Receptors	1.19	0.158	BMPR1B,BMP2,BMPR2
NF-ÎºB Signaling	1.18	0.0811	PIK3R3,PIK3CA,IL1F9,BMPR1B,GHR,BMP2,CREBBP,BMPR2,KRAS,EIF2AK2,TLR3,EP300
Molecular Mechanisms of Cancer	1.17	0.0676	ARHGEF4,PIK3CA,PA2G4,BMP2,DIRAS3,CREBBP,LRP6,BMPR2,KRAS,GNA14,CCND1,RALBP1,EP300,PIK3R3,BMPR1B,CCND3,JUN,CBL,FOXO1,PTPN11,E2F5,RHOU,CYCS (includes EG:54205),BCL2L11
Actin Cytoskeleton Signaling	1.17	0.0717	MYH10,ARHGEF4,PIK3CA,PFN2,MYH11,KRAS,GSN,PIK3R3,MYLK,IQGAP2,PFN4,PPP1R12B,PPP1R12A,GRLF1,TMSB4Y,FGF7
IL-3 Signaling	1.16	0.0986	PIK3R3,PIK3CA,JUN,IL3RA,FOXO1,KRAS,PPP3CA
VEGF Signaling	1.16	0.0899	EIF1AY,PIK3R3,PIK3CA,FOXO1,YWHAE,EIF1AX,KRAS,EIF2S1
Regulation of Actin-based Motility by Rho	1.14	0.0909	MYLK,DIRAS3,PFN4,PPP1R12B,PFN2,RHOU,PPP1R12A,GSN
Role of Pattern Recognition Receptors in Recognition of Bacteria and Viruses	1.13	0.0946	PIK3R3,PIK3CA,MBL2,IFNA21,EIF2AK2,TLR3,EIF2S1
Glioblastoma Multiforme Signaling	1.12	0.0769	PIK3R3,IGF2,PIK3CA,IGF1,FOXO1,DIRAS3,E2F5,NF2,RHOU,KRAS,CCND1,WNT11
Hereditary Breast Cancer Signaling	1.12	0.0833	PIK3R3,PIK3CA,FANCM,CREBBP,HDAC9 (includes EG:9734),KRAS,RFC1,CCND1,HLTF,EP300
BMP signaling pathway	1.08	0.0921	BMPR1B,JUN,FST,BMP2,CREBBP,BMPR2,KRAS
Pentose and Glucuronate Interconversions	1.07	0.111	XYLB,C22ORF30,AKR1B10,UGT2B15,UGT2B17
RAR Activation	1.06	0.0769	PIK3CA,IL3RA,MED1,NR2F2,CREBBP,PDPK1,EP300,PIK3R3,ADH7,JUN,HLTF,PNPLA4,CITED2
Pyruvate Metabolism	1.06	0.0959	ACSM5,C22ORF30,AKR1B10,ALDH5A1,ALDH9A1,RWDD2A,HADHA
Tryptophan Metabolism	1.04	0.0847	ADH7,C22ORF30,CYP1A2,CYP3A4,BCO2,CYP4X1,ALDH5A1,ALDH9A1,HADHA,CYP3A5
CNTF Signaling	1.04	0.102	PIK3R3,PIK3CA,PTPN11,CNTFR,KRAS
Myc Mediated Apoptosis Signaling	1.03	0.0968	PIK3R3,PIK3CA,IGF1,YWHAE,CYCS (includes EG:54205),KRAS
p53 Signaling	1	0.087	PIK3R3,PIK3CA,JUN,MED1,CCNK,CCND1,TNFRSF10A (includes EG:8797),EP300
SAPK/JNK Signaling	1	0.0825	PIK3R3,PIK3CA,JUN,DUSP8,DUSP10,KRAS,MAP4K5,MAP3K2
Glycolysis/Gluconeogenesis	1	0.0889	ADH7,ACSM5,PGM3,GALK1,ALDH5A1,ALDH9A1,RWDD2A,ALDOC
Regulation of eIF4 and p70S6K Signaling	1	0.0744	EIF1AY,PABPC1,PIK3R3,PIK3CA,EIF1AX,PDPK1,KRAS,EIF2S1,PPP2R1B
Cell Cycle Regulation by BTG Family Proteins	0.963	0.111	E2F5,PPP2R1B,CCND1,CCRN4L
Chronic Myeloid Leukemia Signaling	0.961	0.0784	PIK3R3,PIK3CA,PTPN11,PA2G4,E2F5,HDAC9 (includes EG:9734),KRAS,CCND1
Ascorbate and Aldarate Metabolism	0.932	0.13	C22ORF30,ALDH5A1,ALDH9A1
Role of NANOG in Mammalian Embryonic Stem Cell Pluripotency	0.927	0.0796	PIK3R3,PIK3CA,BMPR1B,RIF1,BMP2,BMPR2,KRAS,TCF7L1,WNT11
Erythropoietin Signaling	0.905	0.0833	PIK3R3,PIK3CA,JUN,CBL,PDPK1,KRAS
Angiopoietin Signaling	0.905	0.0845	PIK3R3,PIK3CA,FOXO1,PTPN11,KRAS,ANGPTL1
Glioma Signaling	0.903	0.0748	PIK3R3,IGF2,PIK3CA,IGF1,PA2G4,E2F5,KRAS,CCND1
Thrombopoietin Signaling	0.894	0.0909	PIK3R3,PIK3CA,JUN,PTPN11,KRAS
Melanocyte Development and Pigmentation Signaling	0.88	0.0833	PIK3R3,PIK3CA,PTPN11,CREBBP,KRAS,CREB5,EP300
Endometrial Cancer Signaling	0.868	0.0909	PIK3R3,PIK3CA,PDPK1,KRAS,CCND1
FcÎ³RIIB Signaling in B Lymphocytes	0.865	0.087	PIK3R3,PIK3CA,PDPK1,KRAS
IL-2 Signaling	0.843	0.0893	PIK3R3,PIK3CA,JUN,PTPN11,KRAS
PI3K/AKT Signaling	0.825	0.0698	PIK3R3,PIK3CA,FOXO1,YWHAE,PDPK1,LIMS1,KRAS,PPP2R1B,CCND1
Role of Osteoblasts, Osteoclasts and Chondrocytes in Rheumatoid Arthritis	0.821	0.0673	PIK3CA,BMP2,LRP6,BMPR2,TCF7L1,GSN,PIK3R3,IL1F9,BMPR1B,CBL,JUN,IGF1,FOXO1,PPP3CA,WNT11
Glioma Invasiveness Signaling	0.819	0.0893	PIK3R3,PIK3CA,DIRAS3,RHOU,KRAS
Cell Cycle: G1/S Checkpoint Regulation	0.819	0.0862	CCND3,PA2G4,E2F5,HDAC9 (includes EG:9734),CCND1
Linoleic Acid Metabolism	0.816	0.087	CYP1A2,CYP3A4,PNPLA3,PLA2G1B,CYP4X1,CYP3A5
HIF1Î± Signaling	0.813	0.0777	NOS1,PIK3R3,PIK3CA,JUN,MAPK4,CREBBP,KRAS,EP300
Role of PKR in Interferon Induction and Antiviral Response	0.807	0.0909	CYCS (includes EG:54205),EIF2AK2,TLR3,EIF2S1
Glucocorticoid Receptor Signaling	0.793	0.0639	PIK3CA,TAF7L (includes EG:54457),MED1,CREBBP,PBX1,KRAS,GTF2A1,NCOA3,PGR,EP300,PIK3R3,HSPA4,JUN,C20ORF191,TAF3,HLTF,PPP3CA
PPARÎ±/RXRÎ± Activation	0.784	0.0696	PPARA,JUN,GHR,MED1,TGFBR3,CREBBP,NR2C2,KRAS,NCOA3,ABCA1,EP300
FXR/RXR Activation	0.784	0.0814	PPARA,IL1F9,LIPC,FOXO1,CREBBP,CYP7A1,HNF4A
Factors Promoting Cardiogenesis in Vertebrates	0.784	0.0778	BMPR1B,TGFBR3,BMP2,LRP6,BMPR2,TCF7L1,WNT11
Starch and Sucrose Metabolism	0.784	0.0814	PGM3,KL,GALK1,UGT2B15,UGT2B17,ENPP2,SLC3A1
Small Cell Lung Cancer Signaling	0.775	0.0714	NOS1,PIK3R3,PIK3CA,PA2G4,CYCS (includes EG:54205),CCND1
Acute Phase Response Signaling	0.764	0.0694	PIK3R3,PIK3CA,IL1F9,MBL2,JUN,PTPN11,APCS,PDPK1,KRAS,FGB,FGA,HMOX2
Calcium Signaling	0.764	0.0645	MYH10,TPM1,CREBBP,MEF2A (includes EG:4205),HDAC9 (includes EG:9734),MYH11,TPM4,ASPH,CREB5,PPP3CA,CABIN1,EP300
Melanoma Signaling	0.753	0.0909	PIK3R3,PIK3CA,KRAS,CCND1
RANK Signaling in Osteoclasts	0.749	0.0745	PIK3R3,PIK3CA,JUN,CBL,GSN,PPP3CA,MAP3K2
Tight Junction Signaling	0.72	0.0688	MYLK,MPDZ,MYH10,JUN,MPP5,CLDN1,CGN,MYH11,SAFB,CNKSR3,PPP2R1B
ILK Signaling	0.716	0.0682	PIK3R3,MYH10,PIK3CA,JUN,DIRAS3,RHOU,PDPK1,MYH11,CREB5,PPP2R1B,TMSB4Y,CCND1
RAN Signaling	0.691	0.111	KPNA3,KPNA6
14-3-3-mediated Signaling	0.687	0.0727	PIK3R3,PIK3CA,JUN,CBL,FOXO1,YWHAE,KRAS,SNCA
CCR3 Signaling in Eosinophils	0.687	0.0702	MYLK,PIK3R3,PIK3CA,PLA2G1B,GNB5,PPP1R12B,PPP1R12A,KRAS
Interferon Signaling	0.685	0.1	IFIT1,IFNA21,STAT2
Biosynthesis of Steroids	0.685	0.1	SQLE,FDFT1,ISPD
HMGB1 Signaling	0.683	0.0729	PIK3R3,PIK3CA,JUN,DIRAS3,MYST4,RHOU,KRAS
Role of Oct4 in Mammalian Embryonic Stem Cell Pluripotency	0.68	0.0889	KDM5B,REST,NR2F2,MEF2A (includes EG:4205)
Thyroid Cancer Signaling	0.68	0.087	KRAS,TCF7L1,RET,CCND1
JAK/Stat Signaling	0.668	0.0781	PIK3R3,PIK3CA,PTPN11,STAT2,KRAS
Acute Myeloid Leukemia Signaling	0.665	0.0741	PIK3R3,PIK3CA,KRAS,RUNX1,TCF7L1,CCND1
Granzyme A Signaling	0.651	0.118	CREBBP,EP300
Parkinson's Signaling	0.651	0.118	CYCS (includes EG:54205),SNCA
Endoplasmic Reticulum Stress Pathway	0.651	0.118	DNAJC3,EIF2S1
Ceramide Signaling	0.648	0.0732	PIK3R3,PIK3CA,JUN,CYCS (includes EG:54205),KRAS,PPP2R1B
Arginine and Proline Metabolism	0.648	0.0769	CNDP1,NOS1,C22ORF30,AGMAT,ALDH5A1,ALDH9A1
AMPK Signaling	0.64	0.0657	PIK3R3,PFKFB3,PIK3CA,CPT2,PDPK1,AK3L1,PPM1A,PPP2R1B,HLTF
T Cell Receptor Signaling	0.637	0.0693	PTPRC,PIK3R3,PIK3CA,JUN,CBL,KRAS,PPP3CA
Androgen Signaling	0.631	0.0611	HSPA4,JUN,CREBBP,GNB5,GNA14,GTF2A1,CCND1,EP300
Valine, Leucine and Isoleucine Degradation	0.63	0.0794	ADH7,IVD,ALDH5A1,ALDH9A1,HADHA
Androgen and Estrogen Metabolism	0.616	0.075	ARSE,ARSD,UGT2B15,UGT2B17,STS,SULF2
Toll-like Receptor Signaling	0.614	0.08	PPARA,JUN,EIF2AK2,TLR3
Propanoate Metabolism	0.612	0.0781	ACSM5,IVD,ALDH5A1,ALDH9A1,HADHA
Metabolism of Xenobiotics by Cytochrome P450	0.608	0.0722	ADH7,CYP1A2,CYP3A4,UGT2B15,CYP4X1,UGT2B17,CYP3A5
HGF Signaling	0.608	0.07	PIK3R3,PIK3CA,JUN,PTPN11,KRAS,CCND1,MAP3K2
Pentose Phosphate Pathway	0.604	0.0909	PGM3,H6PD,ALDOC
Cardiac Hypertrophy Signaling	0.585	0.0617	PIK3CA,DIRAS3,CREBBP,GNB5,MEF2A (includes EG:4205),KRAS,GNA14,EP300,PIK3R3,JUN,IGF1,RHOU,PPP3CA,MAP3K2
Thrombin Signaling	0.577	0.0622	MYLK,PIK3R3,PIK3CA,ARHGEF4,DIRAS3,GNB5,PPP1R12B,RHOU,PPP1R12A,PDPK1,KRAS,GNA14
Production of Nitric Oxide and Reactive Oxygen Species in Macrophages	0.56	0.0625	PPARA,PIK3R3,PIK3CA,JUN,DIRAS3,CREBBP,RHOU,PPP1R12A,PPP2R1B,MAP3K2
Phospholipase C Signaling	0.55	0.0583	ARHGEF4,DIRAS3,CREBBP,PLA2G1B,GNB5,MEF2A (includes EG:4205),HDAC9 (includes EG:9734),KRAS,CREB5,EP300,PPP1R12B,RHOU,PPP1R12A,PPP3CA
PDGF Signaling	0.546	0.0714	PIK3R3,PIK3CA,JUN,KRAS,EIF2AK2
FAK Signaling	0.542	0.0625	PIK3R3,PIK3CA,TLN2,PDPK1,KRAS,TNS1
Pancreatic Adenocarcinoma Signaling	0.542	0.0631	PIK3R3,PIK3CA,PA2G4,E2F5,KRAS,CCND1,RALBP1
Synaptic Long Term Depression	0.535	0.0634	NOS1,IGF1,GUCY1A3,PNPLA3,PLA2G1B,KRAS,GNA14,PPP2R1B,PRKG1
Sphingolipid Metabolism	0.515	0.069	ARSE,ARSD,ACER1,UGT2A3,SPTLC2,SULF2
RhoA Signaling	0.505	0.0667	MYLK,IGF1,SEPT7,PPP1R12B,PFN2,GRLF1,PPP1R12A
Insulin Receptor Signaling	0.488	0.063	PIK3R3,PIK3CA,CBL,FOXO1,PTPN11,PPP1R12A,PDPK1,KRAS
B Cell Receptor Signaling	0.484	0.0608	PTPRC,PIK3R3,PIK3CA,JUN,PTPN11,KRAS,CREB5,PPP3CA,MAP3K2
Amyotrophic Lateral Sclerosis Signaling	0.477	0.0645	NOS1,PIK3R3,PIK3CA,IGF1,CYCS (includes EG:54205),PPP3CA
Retinol Metabolism	0.474	0.0769	ADH7,UGT2B15,UGT2B17
Role of BRCA1 in DNA Damage Response	0.471	0.069	FANCM,E2F5,RFC1,HLTF
Mitotic Roles of Polo-Like Kinase	0.471	0.069	ESPL1,PPP2R1B,STAG2,SMC1A
Stilbene, Coumarine and Lignin Biosynthesis	0.466	0.087	C22ORF30,KL
HER-2 Signaling in Breast Cancer	0.46	0.0641	PIK3R3,PIK3CA,FOXO1,KRAS,CCND1
Role of Wnt/GSK-3Î² Signaling in the Pathogenesis of Influenza	0.447	0.0641	CSNK1G1,IFNA21,TCF7L1,NCOA3,WNT11
Wnt/Î²-catenin Signaling	0.446	0.0599	CSNK1G1,SOX6,TGFBR3,LRP6,CREBBP,TCF7L1,PPP2R1B,CCND1,WNT11,EP300
Systemic Lupus Erythematosus Signaling	0.438	0.0552	PTPRC,PIK3R3,PIK3CA,IL1F9,JUN,CBL,IFNA21,KRAS
Germ Cell-Sertoli Cell Junction Signaling	0.437	0.06	PIK3R3,PIK3CA,AGGF1,DIRAS3,RHOU,PDPK1,KRAS,GSN,MAP3K2
Endothelin-1 Signaling	0.429	0.0595	NOS1,PIK3R3,PIK3CA,JUN,GUCY1A3,PNPLA3,MAPK4,PLA2G1B,KRAS,GNA14
Role of RIG1-like Receptors in Antiviral Innate Immunity	0.421	0.0652	CREBBP,IFNA21,EP300
Fc Epsilon RI Signaling	0.419	0.0619	PIK3R3,PIK3CA,PTPN11,PLA2G1B,PDPK1,KRAS
Human Embryonic Stem Cell Pluripotency	0.419	0.0548	PIK3R3,PIK3CA,BMPR1B,BMP2,BMPR2,PDPK1,TCF7L1,WNT11
CD28 Signaling in T Helper Cells	0.409	0.0569	PTPRC,PIK3R3,PIK3CA,JUN,PTPN11,PDPK1,PPP3CA
Integrin Signaling	0.407	0.0556	MYLK,PIK3R3,PIK3CA,TSPAN5,TLN2,DIRAS3,PPP1R12B,RHOU,PPP1R12A,LIMS1,KRAS
NRF2-mediated Oxidative Stress Response	0.405	0.0559	PIK3R3,PIK3CA,DNAJB12,JUN,GPX2,CREBBP,DNAJC3,KRAS,FOSL1,EP300
EGF Signaling	0.405	0.0667	PIK3R3,PIK3CA,JUN
Activation of IRF by Cytosolic Pattern Recognition Receptors	0.4	0.0625	JUN,CREBBP,IFNA21,STAT2
Role of NFAT in Regulation of the Immune Response	0.397	0.0535	PIK3R3,PIK3CA,JUN,CSNK1G1,GNB5,MEF2A (includes EG:4205),KRAS,GNA14,PPP3CA,CABIN1
Role of PI3K/AKT Signaling in the Pathogenesis of Influenza	0.387	0.0588	PIK3R3,KPNA3,PIK3CA,IFNA21
Cholecystokinin/Gastrin-mediated Signaling	0.378	0.0606	IL1F9,JUN,DIRAS3,MEF2A (includes EG:4205),RHOU,KRAS
Colorectal Cancer Metastasis Signaling	0.365	0.0542	PIK3CA,DIRAS3,LRP6,GNB5,KRAS,TCF7L1,CCND1,PIK3R3,APPL1,JUN,RHOU,TLR3,WNT11
FGF Signaling	0.365	0.0595	PIK3R3,PIK3CA,PTPN11,CREB5,FGF7
Aminosugars Metabolism	0.362	0.0625	PGM3,GALK1,PDE11A,CYB561
GABA Receptor Signaling	0.36	0.0652	GABRB3,ALDH5A1,ALDH9A1
Rac Signaling	0.35	0.0517	PIK3R3,PIK3CA,IQGAP2,JUN,KRAS,ANK1
Role of NFAT in Cardiac Hypertrophy	0.346	0.0532	PIK3R3,PIK3CA,IGF1,GNB5,MEF2A (includes EG:4205),HDAC9 (includes EG:9734),KRAS,PPP3CA,CABIN1,EP300
N-Glycan Degradation	0.343	0.069	MANEA,EDEM1
Synaptic Long Term Potentiation	0.341	0.0577	CREBBP,PPP1R12A,KRAS,CREB5,PPP3CA,EP300
iCOS-iCOSL Signaling in T Helper Cells	0.332	0.0531	PTPRC,PIK3R3,PIK3CA,PDPK1,PLEKHA2 (includes EG:59339),PPP3CA
Relaxin Signaling	0.33	0.0522	PIK3R3,PIK3CA,JUN,GUCY1A3,GNB5,GNA14,PDE11A
Hypoxia Signaling in the Cardiovascular System	0.328	0.0588	JUN,UBE2H (includes EG:7328),CREB5,EP300
Cdc42 Signaling	0.324	0.0504	MYLK,IQGAP2,JUN,FNBP1L,PPP1R12A,CLIP1
Synthesis and Degradation of Ketone Bodies	0.322	0.0833	HADHA
Galactose Metabolism	0.321	0.0612	PGM3,GALK1,AKR1B10
IL-6 Signaling	0.316	0.0549	ABCB1,IL1F9,JUN,PTPN11,KRAS
Circadian Rhythm Signaling	0.311	0.0606	CREB5,ADCYAP1
IL-9 Signaling	0.311	0.0571	PIK3R3,PIK3CA
LPS-stimulated MAPK Signaling	0.308	0.0533	PIK3R3,PIK3CA,JUN,KRAS
Hepatic Cholestasis	0.307	0.053	PPARA,ABCB1,IL1F9,JUN,CYP7A1,SLCO1A2,HNF4A
IL-8 Signaling	0.307	0.0526	PIK3R3,PIK3CA,CCND3,DIRAS3,GNB5,RHOU,KRAS,CCND1,CSTB
CD27 Signaling in Lymphocytes	0.297	0.0545	JUN,CYCS (includes EG:54205),MAP3K2
ATM Signaling	0.297	0.0566	JUN,CREB5,SMC1A
Cellular Effects of Sildenafil (Viagra)	0.292	0.0538	MYLK,MYH10,GUCY1A3,PPP1R12B,PPP1R12A,MYH11,PRKG1
Chemokine Signaling	0.288	0.0563	JUN,PPP1R12B,PPP1R12A,KRAS
Semaphorin Signaling in Neurons	0.286	0.0577	DPYSL2,DIRAS3,RHOU
Histidine Metabolism	0.286	0.0577	CNDP1,ALDH5A1,ALDH9A1
Ovarian Cancer Signaling	0.285	0.0515	PIK3R3,PIK3CA,PA2G4,KRAS,TCF7L1,CCND1,WNT11
PKCÎ¸ Signaling in T Lymphocytes	0.284	0.0484	PIK3R3,PIK3CA,JUN,KRAS,PPP3CA,MAP3K2
Role of CHK Proteins in Cell Cycle Checkpoint Control	0.282	0.0571	E2F5,RFC1
Complement System	0.282	0.0588	CD59,MBL2
FcÎ³ Receptor-mediated Phagocytosis in Macrophages and Monocytes	0.282	0.0538	MYO5A,PIK3R3,TLN2,CBL,FYB
NF-ÎºB Activation by Viruses	0.279	0.0513	PIK3R3,PIK3CA,KRAS,EIF2AK2
IL-17 Signaling	0.279	0.0541	PIK3R3,PIK3CA,JUN,KRAS
Leptin Signaling in Obesity	0.279	0.0533	PIK3R3,PIK3CA,FOXO1,PTPN11
CXCR4 Signaling	0.274	0.051	PIK3R3,PIK3CA,JUN,DIRAS3,GNB5,RHOU,KRAS,GNA14
Nitric Oxide Signaling in the Cardiovascular System	0.27	0.05	PIK3R3,PIK3CA,GUCY1A3,PRKG1
Pyrimidine Metabolism	0.268	0.053	DPYSL2,DUT (includes EG:1854),POLD3,DPYS,NME5,PAPD5,AK3L1,TK2
Nucleotide Sugars Metabolism	0.256	0.0667	TGDS
Polyamine Regulation in Colon Cancer	0.256	0.0588	KRAS
N-Glycan Biosynthesis	0.255	0.0545	WDFY3,ST6GAL2,UGT2A3
Fatty Acid Elongation in Mitochondria	0.238	0.0625	HADHA
Granzyme B Signaling	0.238	0.0625	CYCS (includes EG:54205)
Retinoic acid Mediated Apoptosis Signaling	0.236	0.0508	CYCS (includes EG:54205),IFNA21,TNFRSF10A (includes EG:8797)
Coagulation System	0.233	0.0541	FGB,FGA
MIF Regulation of Innate Immunity	0.233	0.0488	JUN,PLA2G1B
Glyoxylate and Dicarboxylate Metabolism	0.222	0.0588	MTHFD1L
Maturity Onset Diabetes of Young (MODY) Signaling	0.193	0.0476	HNF4A

## Sheet: Table S4C
Table S4C - Networks associated with human liver sex-biased genes as identified by Ingenuity Pathway Analysis (IPA) (focus molecules >= 10)
ID	Molecules in Network	Score	Focus Molecules	Top Functions
1	ASH1L,CDK14,COL15A1,E2f,EFHC1,FMR1,FSH,FST,GRLF1,hCG,HDAC9 (includes EG:9734),HDGF,HIST1H4C,Histone h3,Histone h4,IgG,KDM4C,LDLR,LGALS1,Lh,MRPS6 (includes EG:64968),PFKFB3,PGRMC1,PI4K2A,PTPRE,RAB14,RGS12,SF3B1,STS,SUPT16H,TGFBR3,THRAP3,TPM1,ZBED1,ZEB1	29	28	Genetic Disorder, Reproductive System Disease, Cell-To-Cell Signaling and Interaction
2	26s Proteasome,ADCYAP1,Akt,Ap1,BMP2,CBL,CCND1,CCND3,Creb,Cyclin E,CYCS (includes EG:54205),CYLD,E2F5,EP300,ERK,ERK1/2,Estrogen Receptor,FOSL1,GSN,H19,IGF1,IGF2,IL1F9,Jnk,JUN,KRAS,LAMA3,LDL,MYH11,NFkB (complex),P38 MAPK,PDPK1,PGR,PI3K,RUNX1	19	22	Cellular Development, Hematological System Development and Function, Hematopoiesis
3	AGER,ATAD2,CDK8,CREBBP,ESR2,ESRRA,ETV1,GABPA,GTF2B,IFIT1,IFN Beta,INSIG1,Interferon alpha,IRF3,KAT2B,LBP,LPP,MED1,MED14,MED23,MED26,NBPF15,NCOA1,NCOA3,NF2,NR2C2,RNA polymerase II,SAFB,TAF1,TFF1,THRA,TLR3,TRIB2,TTC28,ZNRF3	13	18	Gene Expression, Infection Mechanism, Hepatic System Disease
4	AKT1,CAMK2N1,CCDC88A,CCL2,CSF2,CSF2RB,CXCL12,CXCR4,CXCR7,DUSP10,ENPP2,ERK,FGF2,FYB,GPX3,IFNB1,IL3,IL13,IL16,IL3RA,ITGA4,KRT1,LGALS1,MBL2,NID1,NOS2,PIN1,PLCXD1,PPP1R12B,PUM1,SNCA,STAT1,TNS1,TPM4,ZNF148	13	18	Cellular Movement, Inflammatory Response, Hematological System Development and Function
5	BRCA1,CCND1,CDKN1A,CRKL,CYP19A1,EP300,ESR1,FDFT1,FSH,HDAC1,HDAC2,Lh,MAP4K5,MBD2,MEF2A (includes EG:4205),NME1,NPPB,PA2G4,PABPC1,PABPN1,PRLR,RBM9,RORA,SAPS2,SF3A1,STRN,TFF2,TMEM97,TMOD1,TP53,WNT11	11	15	Cancer, Gastrointestinal Disease, Cell Cycle
6	ABCA1,Ap1,APOE,CCND1,DEK,DIRAS3,DUSP1,ELANE,FGA,HDL,Ifn gamma,KLF6,LDL,LEP,LIPC,LYN,MAPK8,MCL1,NEDD9,NOS2,NOTCH2NL,PLG,PPARG,PPP2R1B,PTK2B,PXN,SQLE,SRRM1,STAT2,STAT3,TNF,TNFAIP2,WT1,WTAP,XAF1	10	15	Cellular Movement, Immune Cell Trafficking, Cell Death
7	ANK1,APOA5,ATF7IP,ATF7IP2,BLM,C17ORF70,DNAJC3,EDA,EIF2AK2,EIF2S1,FANCA,FANCB,FANCC,FANCE,FANCF,FANCG,FANCL,FANCM,HADHA,HBB (includes EG:3043),HDAC1,HLTF,LPL,MIER1,REST,RMI1,SETDB1,SIN3A,SLC31A1,SP1,SP3,SP4,STAT1,TOP3A,ZBTB10	10	15	Gene Expression, Cell Death, Connective Tissue Development and Function
8	ALCAM,ANGPTL4,ASPM,BCL2L1,BCL2L11,CASP8,CCL5,CD14,CD44,CD59,CDKN2B,CITED2,COL1A1,CTGF,DZIP3,ERK,ESPL1,FADD,FN1,FOXO1,JUN,Laminin,LIMS1,LTBP3,MAPK1,MAPK8,MCL1,PKN2,RAC1,SGK1,SMAD7,TGFB1,TNFRSF10A (includes EG:8797),TNFSF10,TRAM2	10	15	Cell Death, Cell-mediated Immune Response, Cellular Development
9	ATF3,BCL2,CCND1,CDH1,CDKN2A,CORO2A,CTNNB1,DIO1,E2F1,EGFR,EP300,Estrogen Receptor,GFRA1,GPS2,GPX2,HDAC3,IGF1,KDM5C,LGALS3,MNT,NCOR1,PLEK2,PPARA,PTPRC,RB1,SLC26A2,SMG6,SMN1,SYNCRIP,TBL1X,TBL1XR1,TCF7L2 (includes EG:6934),TERT,TFAP2A,TSPAN8	10	15	Cellular Development, Cellular Growth and Proliferation, Cell Cycle
10	ABCB1,ATP11A,AURKA,BAT2L2,CCND1,CEBPB,DDX17,DDX3X,DHX9,DOT1L,ESR1,FAM117B,Histone h4,HNRNPH1,JUB,KHDRBS1,LATS1,LEP,MECP2,MED1,MED23,MGMT,MIR122 (includes EG:406906),NANOG,PRLR,RAB11FIP1,RASA1,RASSF1,SAV1,STK3,TFF1,TNPO1,TNPO2,YBX1,YWHAE	10	15	Cancer, Reproductive System Development and Function, Gene Expression
11	Ap2 alpha,BAX,BCL2,BIRC5,CCNB1,CD44,CDK1,CDKN1A,CDKN2A,CTGF,CYCS (includes EG:54205),DUT (includes EG:1854),ERBB2,FOXO3,HIF1A,ID2,IGF1,JMJD1C,JUNB,KDM5B,MDM2,MYCN,PIK3CA,PPP3CA,PSEN2,RAD23A,RALBP1,SEL1L,SFN,SFRS3,SRI,TOP2A,TP53,TP73,VCAN	9	14	Cell Cycle, Cell Death, Cell-mediated Immune Response
12	ABCC2,Akt,APCS,APP,CAT,CRP,CYP17A1,CYP1A2,CYP2C9,CYP3A4,CYP7A1,ERK1/2,GFER,GJB1,HNF1A,HNF4A,IFNG,IGFBP1,IL1B,IL1RN,INS,INSR,IRS1,LEP,MAPK1,NR0B2,NR1I2,P2RX7,PLA1A,PPP1R12A,PRKG1,SSTR1,TNF,UGT2B15,VEGFA	8	13	Lipid Metabolism, Small Molecule Biochemistry, Nutritional Disease
13	ARID1A,ARID4A,BAF110,HDAC2,HERC2,HSPA4,ING1,IPO9,MGA,MLL,MYST1,NUMA1,PDS5A,PHC1,PHC2,PHC3,PMS1,RAD21,RBBP7,RFC1,RNF2,RYBP,SAP30,SMARCA5,SMARCB1,SMARCC1,SMARCC2 (includes EG:6601),SMARCE1,SMC3,SMC1A,STAG1,STAG2,TACC2,USP9Y,YAF2	8	13	Cellular Assembly and Organization, Cellular Compromise, Gene Expression
14	ACTB,Alpha tubulin,ANK3,ASCL2,ASH2L,C16ORF53,CASP1,CDH1,CLIP1,CREB5,CRIP2,CSPG4,CSTA,CXXC4,DKK1,EMD,ENO3,FBXO32,GMCL1L (includes EG:64396),KDM6A,LAMB3,LMNA,MEN1,MLL2,MLL3,MLL4,NCOA6,PAXIP1,RBBP5,SHC4,SUZ12,SYNE2,TUBB,WDR5,ZNF217	7	12	Post-Translational Modification, Cellular Assembly and Organization, Cell Death
15	Akt,BCL2,BMP2,CABIN1,CAMP,CASP1,CASP3,CHUK,CPD,ERC1,F2,FGB,GAB1,GH1,GHR,GPN3,GRB2,IKBKB,IKBKG,IL4,IL6,IL10,IL6ST,IQGAP2,LEP,MCL1,MMP2,NFkB (complex),NFKBIA,PRL,PTPN11,RELA,STAT1,STAT5A,STK4	5	10	Inflammatory Disease, Cell Death, Gene Expression
