# Supplementary material for: Transcriptional Profiling of Human Liver Identifies Sex-Biased Genes Associated with Polygenic Dyslipidemia and Coronary Artery Disease
Source: PLoS One. 2011 Aug 12;6(8):e23506. doi: 10.1371/journal.pone.0023506 (PMC3155567; doi:10.1371/journal.pone.0023506)
Supplement: Table S5 — (A) Comparison of genes showing sex-biased expression in human, mouse and rat liver, and effect of hypophysectomy in mouse and rat. (B) List of 434 genes that show sex-biased expression in both human and mouse liver. (C) List of 158 genes that show sex-biased expression in both human and rat liver. (D–F) Listings of enriched functional clusters identified by DAVID (enrichment score >1.5) for genes that show sex-biased expression in human liver and either mouse liver (D) or rat liver (E) or mouse and rat liver (F), and where expression of the sex-biased mouse and rat genes is altered by hypophysectomy. (XLS) [file pone.0023506.s009.xls]

## Sheet: Table S5A
Table S5A - Comparison of genes showing sex-biased expression in human, mouse and rat liver, and effect of hypophysectomy on gene expression in mouse and rat liver
Sex-biased genes common to human and mouse liver
Human gene sex-specificity	Mouse gene sex-specificity	No. of genes in common	No. of mouse genes responsive to hypophysectomy	percentage responsive to hypophysectomy	No. of mouse genes not responsive to hypophysectomy	percentage not responsive to hypophysectomy
F	F	230	168	0.730435	62	0.269565
F	M	110	89	0.809091	21	0.190909
M	M	53	37	0.698113	16	0.301887
M	F	41	31	0.756098	10	0.243902
	Total	434	325	0.748848	109	0.251152
Sex-dependent genes common to human and rat liver
Human gene sex-specificity	Rat gene sex-specificity	No. of genes in common	No. of rat genes responsive to hypophysectomy	percentage responsive to hypophysectomy	No. of rat genes not responsive to hypophysectomy	percentage not responsive to hypophysectomy
F	F	54	39	0.722222	15	0.277778
F	M	64	49	0.765625	15	0.234375
M	M	19	15	0.789474	4	0.210526
M	F	21	19	0.904762	2	0.0952381
	Total	158	122	0.772152	36	0.227848
Sex-dependent genes common to human, mouse and rat liver
Human gene sex-specificity	Mouse gene sex-specificity	Rat gene sex-specificity	No. of genes in common
F	F	F	21
F	M	F	13
F	F	M	20
F	M	M	12
M	F	M	6
M	F	F	7
M	M	F	2
M	M	M	6
		Total	87

## Sheet: Table S5B 
Table S5B - 434 genes show sex-biased expression in both human and mouse liver based on criteria: |fold-change| >1.15, p<0.005 for human microarray and mouse microarrays run on the Agilent platform, and p<0.05 for mouse microarrays run on the Merck platform. All information is summarized in column Q, where the first character represents the sex-bias in human liver; 2nd and 3rd characters represen…
						Mouse			Human liver array		Agilent mouse liver array	Merck mouse liver array	Impact of Hypox in male mouse liver	Impact of Hypox in female mouse liver	Summary of Response to hypophysectomy			87 sex-biased genes common to human, mouse and rat	sex-bias	71	68
Agilent Human Microarray Probe Name	Probe Chromosomal Coordinates (hg19)	Gene Symbol	Gene Accession	Gene Name	GO Annotation	Symbol	same symbol between human and mouse	DNA binding or Transcription	Composite array score	sex-bias	sex-bias	sex-bias	0-noresponse; 1-up-regulated; 2-down-regulated	0-noresponse; 1-up-regulated; 2-down-regulated	1-response 0-no response	Class	Number of genes in Class		1st digit-human 2nd digit-mouse 3rd digit-rat	respond to hypophysectomy in mouse liver	respond to hypophysectomy in rat liver
A_23_P146198	chr8:59403414-59403473	CYP7A1	NM_000780	Cytochrome P450, family 7, subfamily A, polypeptide 1	molecular function|cholesterol 7-alpha-monooxygenase activity|EXP|GO:0008123|GOA|2384150//molecular function|cholesterol 7-alpha-monooxygenase activity|ISS|GO:0008123|GOA|na//molecular function|electron carrier activity|IEA|GO:0009055|GOA|na//molecular fu	Cyp7a1	Yes	No	14	F	F	F	0	0	0	FFF00	14	Yes	FFM	0	1
A_24_P384954	chr6:163992231-163992290	QKI	NM_206855	quaking homolog, KH domain RNA binding (mouse)	molecular function|RNA binding|IEA|GO:0003723|GOA|na//molecular function|SH3 domain binding|IEA|GO:0017124|GOA|na//molecular function|protein binding|IPI|GO:0005515|GOA|16713569//biological process|RNA splicing|IEA|GO:0008380|GOA|na//biological process|long-chain fatty acid biosynthetic process|IEA|GO:0042759|GOA|na//biological process|mRNA processing|IEA|GO:0006397|GOA|na//biological process|mRN…	Qk	No	No	15	F	F	F	0	0	0	FFF00	14	No
A_23_P22557	chrX:135313007-135313066	MAP7D3	NM_024597	MAP7 domain containing 3		Mtap7d3	No	No	16	F	F	F	0	0	0	FFF00	14	No
A_24_P201353	chr10:104623787-104623846	C10orf32	NM_144591	Chromosome 10 open reading frame 32		2010012O05Rik	No	No	14	F	F	F	0	0	0	FFF00	14	No
A_23_P103496	chr1:89652014-89652072	GBP4	NM_052941	Guanylate binding protein 4	molecular function|GTP binding|IEA|GO:0005525|GOA|na//molecular function|GTPase activity|IEA|GO:0003924|GOA|na//molecular function|nucleotide binding|IEA|GO:0000166|GOA|na//cellular component|cytoplasm|IEA|GO:0005737|GOA|na	Gbp3	No	No	14	F	F	F	0	0	0	FFF00	14	No
A_23_P32165	chr9:126795257-126795316	LHX2	NM_004789	LIM homeobox 2	molecular function|metal ion binding|IEA|GO:0046872|GOA|na//molecular function|sequence-specific DNA binding|IEA|GO:0043565|GOA|na//molecular function|transcription factor activity|IEA|GO:0003700|GOA|na//molecular function|zinc ion binding|IEA|GO:0008270|	Lhx2	Yes	Yes	14	F	F	F	0	0	0	FFF00	14	No
A_23_P143331	chr20:6759242-6759301	BMP2	NM_001200	Bone morphogenetic protein 2	molecular function|SMAD binding|IDA|GO:0046332|GOA|18184661//molecular function|cytokine activity|IEA|GO:0005125|GOA|na//molecular function|growth factor activity|IEA|GO:0008083|GOA|na//molecular function|protein binding|IPI|GO:0005515|GOA|ARRAY(0xe945a0)	Bmp2	Yes	No	15	F	F	F	0	0	0	FFF00	14	No
A_23_P51856	chr1:221875178-221875237	DUSP10	NM_144729	Dual specificity phosphatase 10	molecular function|MAP kinase tyrosine/serine/threonine phosphatase activity|IEA|GO:0017017|GOA|na//molecular function|hydrolase activity|IEA|GO:0016787|GOA|na//molecular function|phosphoprotein phosphatase activity|TAS|GO:0004721|GOA|10391943//molecular	Dusp10	Yes	No	15	F	F	F	0	0	0	FFF00	14	No
A_23_P52266	chr10:91163438-91163497	IFIT1	NM_001548	Interferon-induced protein with tetratricopeptide repeats 1	molecular function|binding|IEA|GO:0005488|GOA|na//molecular function|molecular_function|ND|GO:0003674|GOA|3753936//biological process|biological_process|ND|GO:0008150|GOA|na//cellular component|cytoplasm|NAS|GO:0005737|GOA|3753936	Ifit1	Yes	No	14	F	F	F	0	0	0	FFF00	14	No
A_32_P14978	chr15:49089568-49089627	CEP152	NM_014985	Centrosomal protein 152kDa	cellular component|cytoplasm|IEA|GO:0005737|GOA|na//cellular component|cytoskeleton|IEA|GO:0005856|GOA|na//cellular component|cytosol|EXP|GO:0005829|GOA|ARRAY(0x2b86e18)//cellular component|microtubule organizing center|IEA|GO:0005815|GOA|na	Cep152	Yes	No	15	F	F	F	0	0	0	FFF00	14	No
A_32_P104841	chr3:151153822-151153881	IGSF10	AF087980	Immunoglobulin superfamily, member 10	biological process|cell differentiation|IEA|GO:0030154|GOA|na//biological process|multicellular organismal development|IEA|GO:0007275|GOA|na//biological process|ossification|IEA|GO:0001503|GOA|na//biological process|tissue regeneration|IEA|GO:0042246|GOA|	Igsf10	Yes	No	16	F	F	F	0	0	0	FFF00	14	No
A_23_P65555	chr14:51111510-51111569	SAV1	NM_021818	Salvador homolog 1 (Drosophila)	molecular function|identical protein binding|IPI|GO:0042802|GOA|16930133//molecular function|protein binding|IPI|GO:0005515|GOA|16930133//biological process|signal transduction|IEA|GO:0007165|GOA|na	Sav1	Yes	No	16	F	F	F	0	0	0	FFF00	14	No
A_32_P350897	chr7:11412914-11412973	THSD7A	NM_015204	Thrombospondin, type I, domain containing 7A	cellular component|integral to membrane|IEA|GO:0016021|GOA|na//cellular component|membrane|IEA|GO:0016020|GOA|na	Thsd7a	Yes	No	14	F	F	F	0	0	0	FFF00	14	No
A_24_P10233	chr15:64200366-64200425	DAPK2	NM_014326	Death-associated protein kinase 2	molecular function|ATP binding|IDA|GO:0005524|GOA|10376525//molecular function|calmodulin binding|IDA|GO:0005516|GOA|10376525//molecular function|calmodulin-dependent protein kinase activity|TAS|GO:0004683|GOA|10629061//molecular function|identical protei	Dapk2	Yes	No	14	F	F	F	0	0	0	FFF00	14	No
A_24_P930062	chr5:139060743-139060802	CXXC5	NM_016463	CXXC finger 5	molecular function|DNA binding|IEA|GO:0003677|GOA|na//molecular function|metal ion binding|IEA|GO:0046872|GOA|na//molecular function|signal transducer activity|IMP|GO:0004871|GOA|12761501//molecular function|zinc ion binding|IEA|GO:0008270|GOA|na//biologi	Cxxc5	Yes	Yes	14	F	F	F	0	1	1	FFF01	2	No
A_23_P126706	chr1:178820259-178820318	ANGPTL1	NM_004673	Angiopoietin-like 1	molecular function|receptor binding|IEA|GO:0005102|GOA|na//biological process|signal transduction|IEA|GO:0007165|GOA|na//biological process|transmembrane receptor protein tyrosine kinase signaling pathway|IEA|GO:0007169|GOA|na//cellular component|extracel	Angptl1	Yes	No	14	F	F	F	0	1	1	FFF01	2	No
A_24_P52597	chr10:104590302-104590361	CYP17A1	NM_000102	Cytochrome P450, family 17, subfamily A, polypeptide 1	molecular function|electron carrier activity|IEA|GO:0009055|GOA|na//molecular function|heme binding|IEA|GO:0020037|GOA|na//molecular function|metal ion binding|IEA|GO:0046872|GOA|na//molecular function|monooxygenase activity|IEA|GO:0004497|GOA|na//molecul	Cyp17a1	Yes	No	16	F	F	F	0	2	1	FFF02	10	Yes	FFM	1	1
A_24_P367666	chr1:155448859-155448918	ASH1L	NM_018489	Ash1 (absent, small, or homeotic)-like (Drosophila)	molecular function|DNA binding|IEA|GO:0003677|GOA|na//molecular function|RNA polymerase II transcription factor activity|TAS|GO:0003702|GOA|10860993//molecular function|histone-lysine N-methyltransferase activity|IEA|GO:0018024|GOA|na//molecular function|	Ash1l	Yes	Yes	15	F	F	F	0	2	1	FFF02	10	No
A_23_P72068	chr6:1960127-1960186	GMDS	NM_001500	GDP-mannose 4,6-dehydratase	molecular function|GDP-mannose 4,6-dehydratase activity|TAS|GO:0008446|GOA|11698403//molecular function|binding|IEA|GO:0005488|GOA|na//molecular function|coenzyme binding|IEA|GO:0050662|GOA|na//molecular function|lyase activity|IEA|GO:0016829|GOA|na//biol	Gmds	Yes	No	16	F	F	F	0	2	1	FFF02	10	No
A_23_P17914	chr22:44342759-44342818	PNPLA3	NM_025225	Patatin-like phospholipase domain containing 3	molecular function|acyltransferase activity|IEA|GO:0008415|GOA|na//molecular function|diolein transacylation activity|IDA|GO:0051265|GOA|15364929//molecular function|hydrolase activity|IEA|GO:0016787|GOA|na//molecular function|mono-olein transacylation ac	Pnpla3	Yes	No	16	F	F	F	0	2	1	FFF02	10	No
A_23_P412932	chr2:234975894-234978606	SPP2	NM_006944	Secreted phosphoprotein 2, 24kDa	molecular function|endopeptidase inhibitor activity|TAS|GO:0004866|GOA|7814406//biological process|bone remodeling|IEA|GO:0046849|GOA|na//biological process|protein complex assembly|IEA|GO:0006461|GOA|na//biological process|skeletal system development|TAS	Spp2	Yes	No	15	F	F	F	0	2	1	FFF02	10	No
A_24_P932233	chr4:106156863-106156922	TET2	NM_017628	Tet oncogene family member 2	molecular function|metal ion binding|IEA|GO:0046872|GOA|na//molecular function|oxidoreductase activity|IEA|GO:0016491|GOA|na//molecular function|oxidoreductase activity, acting on paired donors, with incorporation or reduction of molecular oxygen, 2-oxogl	Tet2	Yes	No	14	F	F	F	0	2	1	FFF02	10	No
A_24_P212072	chr5:93966300-93966359	ANKRD32	NM_032290	Ankyrin repeat domain 32	cellular component|intracellular|IEA|GO:0005622|GOA|na	Ankrd32	Yes	No	16	F	F	F	0	2	1	FFF02	10	No
A_24_P273413	chr2:42483688-42483747	EML4	NM_019063	Echinoderm microtubule associated protein like 4	molecular function|molecular_function|ND|GO:0003674|GOA|na//molecular function|protein binding|IPI|GO:0005515|GOA|17353931//biological process|microtubule-based process|NAS|GO:0007017|GOA|10995578//biological process|mitosis|NAS|GO:0007067|GOA|10995578//c	Eml4	Yes	No	14	F	F	F	0	2	1	FFF02	10	No
A_24_P357688	chr5:36985275-36985334	NIPBL	NM_133433	Nipped-B homolog (Drosophila)	molecular function|chromo shadow domain binding|IPI|GO:0070087|GOA|15882967//molecular function|histone deacetylase binding|IPI|GO:0042826|GOA|18854353//molecular function|protein C-terminus binding|IPI|GO:0008022|GOA|17577209//molecular function|protein	Nipbl	Yes	No	16	F	F	F	0	2	1	FFF02	10	No
A_23_P251104	chr4:52894133-52894175	SGCB	NM_000232	Sarcoglycan, beta (43kDa dystrophin-associated glycoprotein)	biological process|cytoskeleton organization|IEA|GO:0007010|GOA|na//biological process|muscle organ development|TAS|GO:0007517|GOA|ARRAY(0x2db963c)//cellular component|cytoplasm|IEA|GO:0005737|GOA|na//cellular component|cytoskeleton|IEA|GO:0005856|GOA|na/	Sgcb	Yes	No	14	F	F	F	0	2	1	FFF02	10	No
A_24_P295791	chr11:75509279-75509338	DGAT2	NM_032564	Diacylglycerol O-acyltransferase homolog 2 (mouse)	molecular function|2-acylglycerol O-acyltransferase activity|IEA|GO:0003846|GOA|na//molecular function|acyltransferase activity|IEA|GO:0008415|GOA|na//molecular function|diacylglycerol O-acyltransferase activity|IDA|GO:0004144|GOA|11481335//molecular func	Dgat2	Yes	No	15	F	F	F	1	0	1	FFF10	17	Yes	FFF	1	1
A_23_P317654	chrX:41206112-41206171	DDX3X	NM_001356	DEAD (Asp-Glu-Ala-Asp) box polypeptide 3, X-linked	molecular function|ATP binding|IEA|GO:0005524|GOA|na//molecular function|ATP-dependent RNA helicase activity|TAS|GO:0004004|GOA|9381176//molecular function|DNA binding|IEA|GO:0003677|GOA|na//molecular function|RNA binding|IEA|GO:0003723|GOA|na//molecular	Ddx3x	Yes	Yes	15	F	F	F	1	0	1	FFF10	17	Yes	MFM	1	0
A_24_P75056	chr11:74329798-74329850	POLD3	NM_006591	Polymerase (DNA-directed), delta 3, accessory subunit	molecular function|DNA-directed DNA polymerase activity|NAS|GO:0003887|GOA|10219083//molecular function|nucleotidyltransferase activity|IEA|GO:0016779|GOA|na//molecular function|protein binding|IPI|GO:0005515|GOA|16510448//molecular function|transferase a	Pold3	Yes	No	14	F	F	F	1	0	1	FFF10	17	Yes	FFM	1	1
A_23_P361448	chr11:94917588-94917647	SESN3	NM_144665	Sestrin 3	biological process|cell cycle arrest|IEA|GO:0007050|GOA|na//cellular component|nucleus|IEA|GO:0005634|GOA|na	Sesn3	Yes	No	14	F	F	F	1	0	1	FFF10	17	Yes	FFM	1	1
A_24_P193011	chr11:69458639-69458698	CCND1	NM_053056	Cyclin D1	molecular function|cyclin-dependent protein kinase regulator activity|IEA|GO:0016538|GOA|na//molecular function|protein binding|IPI|GO:0005515|GOA|ARRAY(0xe460a0)//molecular function|protein complex binding|IEA|GO:0032403|GOA|na//molecular function|protei	Ccnd1	Yes	No	16	F	F	F	1	0	1	FFF10	17	Yes	FFM	1	1
A_24_P505790	chr8:81733788-81733847	ZNF704	NM_001033723	Zinc finger protein 704	molecular function|metal ion binding|IEA|GO:0046872|GOA|na//molecular function|zinc ion binding|IEA|GO:0008270|GOA|na//cellular component|intracellular|IEA|GO:0005622|GOA|na	Zfp704	No	No	15	F	F	F	1	0	1	FFF10	17	No
A_23_P144668	chr5:10280589-10280648	CMBL	NM_138809	Carboxymethylenebutenolidase homolog (Pseudomonas)	molecular function|hydrolase activity|IEA|GO:0016787|GOA|na//molecular function|protein binding|IPI|GO:0005515|GOA|17353931	Cmbl	Yes	No	14	F	F	F	1	0	1	FFF10	17	No
A_23_P165909	chr2:164466388-164466447	FIGN	NM_018086	Fidgetin	molecular function|ATP binding|IEA|GO:0005524|GOA|na//molecular function|nucleoside-triphosphatase activity|IEA|GO:0017111|GOA|na//molecular function|nucleotide binding|IEA|GO:0000166|GOA|na//cellular component|nuclear matrix|ISS|GO:0016363|GOA|na//cellul	Fign	Yes	No	16	F	F	F	1	0	1	FFF10	17	No
A_23_P63798	chr10:3821387-3821446	KLF6	NR_027653	0	0	Klf6	Yes	No	16	F	F	F	1	0	1	FFF10	17	No
A_24_P126093	chrX:14936853-14936904	MOSPD2	NM_152581	Motile sperm domain containing 2	molecular function|structural molecule activity|IEA|GO:0005198|GOA|na//cellular component|endoplasmic reticulum|IDA|GO:0005783|GOA|18029348//cellular component|integral to membrane|IEA|GO:0016021|GOA|na//cellular component|plasma membrane|IDA|GO:0005886|G	Mospd2	Yes	No	14	F	F	F	1	0	1	FFF10	17	No
A_23_P390116	chr13:24877575-24877634	SPATA13	NM_153023	Spermatogenesis associated 13	molecular function|Rho guanyl-nucleotide exchange factor activity|IEA|GO:0005089|GOA|na//biological process|regulation of Rho protein signal transduction|IEA|GO:0035023|GOA|na//cellular component|intracellular|IEA|GO:0005622|GOA|na	Spata13	Yes	No	15	F	F	F	1	0	1	FFF10	17	No
A_23_P253221	chr2:131804762-131804821	ARHGEF4	NM_032995	Rho guanine nucleotide exchange factor (GEF) 4	molecular function|Rho guanyl-nucleotide exchange factor activity|NAS|GO:0005089|GOA|na//molecular function|guanyl-nucleotide exchange factor activity|EXP|GO:0005085|GOA|11756498//molecular function|protein binding|IPI|GO:0005515|GOA|17588722//molecular f	Arhgef4	Yes	No	14	F	F	F	1	0	1	FFF10	17	No
A_24_P328668	chr3:93755453-93755512	ARL13B	NR_033427	0	0	Arl13b	Yes	No	16	F	F	F	1	0	1	FFF10	17	No
A_24_P254789	chr8:121174729-121174788	COL14A1	NM_021110	Collagen, type XIV, alpha 1	molecular function|collagen binding|NAS|GO:0005518|GOA|2187872//molecular function|extracellular matrix structural constituent|NAS|GO:0005201|GOA|ARRAY(0x1d13c5c)//molecular function|protein binding, bridging|NAS|GO:0030674|GOA|9427527//biological process	Col14a1	Yes	No	16	F	F	F	1	0	1	FFF10	17	No
A_23_P300301	chr10:64974785-64974844	JMJD1C	NM_032776	Jumonji domain containing 1C	molecular function|metal ion binding|IEA|GO:0046872|GOA|na//molecular function|oxidoreductase activity|IEA|GO:0016491|GOA|na//molecular function|oxidoreductase activity, acting on single donors with incorporation of molecular oxygen, incorporation of two	Jmjd1c	Yes	No	14	F	F	F	1	0	1	FFF10	17	No
A_32_P150130	chr8:38828674-38828733	PLEKHA2	NM_021623	Pleckstrin homology domain containing, family A (phosphoinositide binding specific) member 2	molecular function|fibronectin binding|IMP|GO:0001968|GOA|19786618//molecular function|laminin binding|IMP|GO:0043236|GOA|19786618//molecular function|lipid binding|IEA|GO:0008289|GOA|na//molecular function|phosphatidylinositol binding|IEA|GO:0005545|GOA|	Plekha2	Yes	No	16	F	F	F	1	0	1	FFF10	17	No
A_24_P396753	chr2:12880797-12880856	TRIB2	NR_027303	0	0	Trib2	Yes	No	14	F	F	F	1	0	1	FFF10	17	No
A_23_P12392	chr1:198662240-198662299	PTPRC	NM_080923	Protein tyrosine phosphatase, receptor type, C	molecular function|heparan sulfate proteoglycan binding|IEA|GO:0043395|GOA|na//molecular function|heparin binding|IEA|GO:0008201|GOA|na//molecular function|hydrolase activity|IEA|GO:0016787|GOA|na//molecular function|protein binding|IPI|GO:0005515|GOA|ARR	Ptprc	Yes	No	14	F	F	F	1	1	1	FFF11	20	Yes	FFF	1	1
A_23_P337917	chr12:27731136-27731172	PPFIBP1	NM_177444	PTPRF interacting protein, binding protein 1 (liprin beta 1)	molecular function|protein binding|IPI|GO:0005515|GOA|17353931//biological process|cell adhesion|TAS|GO:0007155|GOA|9624153//cellular component|plasma membrane|NAS|GO:0005886|GOA|9624153	Ppfibp1	Yes	No	16	F	F	F	1	1	1	FFF11	20	Yes	FFM	1	1
A_23_P87049	chr11:121500247-121500306	SORL1	NM_003105	Sortilin-related receptor, L(DLR class) A repeats-containing	molecular function|low-density lipoprotein binding|IPI|GO:0030169|GOA|17326667//molecular function|transmembrane receptor activity|TAS|GO:0004888|GOA|9157966//biological process|cholesterol metabolic process|IEA|GO:0008203|GOA|na//biological process|lipid	Sorl1	Yes	No	14	F	F	F	1	1	1	FFF11	20	Yes	FFM	1	1
A_24_P69053	chr4:183717844-183717903	ODZ3	NM_001080477	Odz, odd Oz/ten-m homolog 3 (Drosophila)	biological process|signal transduction|IEA|GO:0007165|GOA|na//cellular component|integral to membrane|IEA|GO:0016021|GOA|na//cellular component|membrane|IEA|GO:0016020|GOA|na	Odz3	Yes	No	15	F	F	F	1	1	1	FFF11	20	Yes	FFM	1	1
A_32_P214665	chr1:161255021-161255080	PCP4L1	NM_001102566	Purkinje cell protein 4 like 1	0	Pcp4l1	Yes	No	16	F	F	F	1	1	1	FFF11	20	Yes	FFM	1	1
A_32_P69802	chr12:21418442-21418501	SLCO1A2	NM_134431	Solute carrier organic anion transporter family, member 1A2	molecular function|bile acid transmembrane transporter activity|EXP|GO:0015125|GOA|7557095//molecular function|organic anion transmembrane transporter activity|TAS|GO:0008514|GOA|9007731//molecular function|transporter activity|IEA|GO:0005215|GOA|na//biological process|ion transport|IEA|GO:0006811|GOA|na//biological process|organic anion transport|TAS|GO:0015711|GOA|9007731//cellular component|in…	Slco1a4	No	No	16	F	F	F	1	1	1	FFF11	20	No
A_24_P72394	chr7:5106063-5106122	RBAK	NM_021163	RB-associated KRAB zinc finger	molecular function|metal ion binding|IEA|GO:0046872|GOA|na//molecular function|nucleic acid binding|IEA|GO:0003676|GOA|na//molecular function|transcription repressor activity|TAS|GO:0016564|GOA|10702291//molecular function|zinc ion binding|NAS|GO:0008270|	Rbak	Yes	Yes	14	F	F	F	1	1	1	FFF11	20	No
A_23_P69573	chr4:156651179-156651224	GUCY1A3	NM_001130685	Guanylate cyclase 1, soluble, alpha 3	molecular function|GTP binding|IEA|GO:0005525|GOA|na//molecular function|guanylate cyclase activity|IEA|GO:0004383|GOA|na//molecular function|heme binding|IEA|GO:0020037|GOA|na//molecular function|ion binding|IEA|GO:0043167|GOA|na//molecular function|nucl	Gucy1a3	Yes	No	15	F	F	F	1	1	1	FFF11	20	No
A_32_P193218	chr3:188602559-188602618	LPP	NM_005578	LIM domain containing preferred translocation partner in lipoma	molecular function|metal ion binding|IEA|GO:0046872|GOA|na//molecular function|protein binding|IPI|GO:0005515|GOA|15649318//molecular function|zinc ion binding|IEA|GO:0008270|GOA|na//biological process|biological_process|ND|GO:0008150|GOA|na//biological p	Lpp	Yes	No	15	F	F	F	1	1	1	FFF11	20	No
A_24_P307695	chr8:86049729-86049788	LRRCC1	NM_033402	Leucine rich repeat and coiled-coil domain containing 1	molecular function|protein binding|IEA|GO:0005515|GOA|na//biological process|cell cycle|IEA|GO:0007049|GOA|na//biological process|cell division|IEA|GO:0051301|GOA|na//biological process|mitosis|IEA|GO:0007067|GOA|na//cellular component|centriole|IEA|GO:00	Lrrcc1	Yes	No	15	F	F	F	1	1	1	FFF11	20	No
A_23_P151506	chr14:67853811-67853870	PLEK2	NM_016445	Pleckstrin 2	biological process|actin cytoskeleton organization|TAS|GO:0030036|GOA|10419454//biological process|intracellular signaling cascade|IEA|GO:0007242|GOA|na//cellular component|cell projection|IEA|GO:0042995|GOA|na//cellular component|cytoplasm|IEA|GO:0005737	Plek2	Yes	No	16	F	F	F	1	1	1	FFF11	20	No
A_23_P69738	chr4:53732842-53732902	RASL11B	NM_023940	RAS-like, family 11, member B	0	Rasl11b	Yes	No	14	F	F	F	1	1	1	FFF11	20	No
A_23_P121489	chr3:100037911-100037958	TBC1D23	NM_018309	TBC1 domain family, member 23	molecular function|Rab GTPase activator activity|IEA|GO:0005097|GOA|na//biological process|regulation of Rab GTPase activity|IEA|GO:0032313|GOA|na//cellular component|intracellular|IEA|GO:0005622|GOA|na	Tbc1d23	Yes	No	16	F	F	F	1	1	1	FFF11	20	No
A_23_P65615	chr14:81667938-81667992	GTF2A1	NM_201595	General transcription factor IIA, 1, 19/37kDa	molecular function|DNA binding|IDA|GO:0003677|GOA|7724559//molecular function|RNA polymerase II transcription factor activity|TAS|GO:0003702|GOA|8224848//molecular function|TATA-binding protein binding|IPI|GO:0017025|GOA|7724559//molecular function|genera	Gtf2a1	Yes	Yes	15	F	F	F	1	1	1	FFF11	20	No
A_32_P95082	chr9:17236502-17236561	CNTLN	NM_017738	Centlein, centrosomal protein	molecular function|two-component sensor activity|IEA|GO:0000155|GOA|na//biological process|signal transduction|IEA|GO:0007165|GOA|na//cellular component|centriole|IEA|GO:0005814|GOA|na//cellular component|cytoplasm|IEA|GO:0005737|GOA|na//cellular componen	Cntln	Yes	No	14	F	F	F	1	1	1	FFF11	20	No
A_24_P883577	chr6:11185143-11185202	NEDD9	NM_006403	Neural precursor cell expressed, developmentally down-regulated 9	molecular function|protein binding|IPI|GO:0005515|GOA|11827972//biological process|actin filament bundle assembly|NAS|GO:0051017|GOA|11827972//biological process|cell adhesion|IEA|GO:0007155|GOA|na//biological process|cell cycle|IEA|GO:0007049|GOA|na//bio	Nedd9	Yes	No	14	F	F	F	1	1	1	FFF11	20	No
A_32_P132827	chrX:67262263-67262322	OPHN1	NM_002547	Oligophrenin 1	molecular function|GTPase activator activity|IEA|GO:0005096|GOA|na//molecular function|Rho GTPase activator activity|TAS|GO:0005100|GOA|9582072//molecular function|actin binding|IEA|GO:0003779|GOA|na//biological process|actin cytoskeleton organization|IEA	Ophn1	Yes	No	16	F	F	F	1	1	1	FFF11	20	No
A_23_P382835	chr3:152555738-152555797	P2RY1	NM_002563	Purinergic receptor P2Y, G-protein coupled, 1	molecular function|ADP binding|IEA|GO:0043531|GOA|na//molecular function|ATP binding|IEA|GO:0005524|GOA|na//molecular function|G-protein coupled receptor activity|IEA|GO:0004930|GOA|na//molecular function|purinergic nucleotide receptor activity, G-protein	P2ry1	Yes	No	14	F	F	F	1	1	1	FFF11	20	No
A_24_P203622	chr1:63084399-63084458	DOCK7	NM_033407	Dedicator of cytokinesis 7	molecular function|Rac GTPase binding|IDA|GO:0048365|GOA|16982419//molecular function|guanyl-nucleotide exchange factor activity|IEA|GO:0005085|GOA|na//biological process|activation of Rac GTPase activity|IDA|GO:0032863|GOA|16982419//biological process|ax	Dock7	Yes	No	15	F	F	F	1	1	1	FFF11	20	No
A_23_P103099	chr22:36174071-36174111	RBM9	NM_014309	RNA binding motif protein 9	molecular function|RNA binding|IDA|GO:0003723|GOA|11875103//molecular function|nucleotide binding|IEA|GO:0000166|GOA|na//molecular function|protein binding|IPI|GO:0005515|GOA|16713569//molecular function|transcription corepressor activity|IDA|GO:0003714|G	Rbm9	Yes	Yes	15	F	F	F	1	1	1	FFF11	20	No
A_24_P736006	chr1:171168486-171168545	FMO2	NM_001460	Flavin containing monooxygenase 2 (non-functional)	molecular function|FAD binding|IEA|GO:0050660|GOA|na//molecular function|NADP or NADPH binding|IEA|GO:0050661|GOA|na//molecular function|flavin-containing monooxygenase activity|IDA|GO:0004499|GOA|11744609//molecular function|monooxygenase activity|EXP|GO	Fmo2	Yes	No	15	F	F	F	1	2	1	FFF12	4	Yes	FFF	1	0
A_32_P155030	chr1:61926891-61926950	NFIA	NM_005595	Nuclear factor I/A	molecular function|transcription factor activity|NAS|GO:0003700|GOA|7590749//molecular function|transcription factor binding|IPI|GO:0008134|GOA|15684392//biological process|DNA replication|IEA|GO:0006260|GOA|na//biological process|regulation of transcript	Nfia	Yes	Yes	14	F	F	F	1	2	1	FFF12	4	No
A_23_P94133	chr8:99139962-99139990	POP1	NM_015029	Processing of precursor 1, ribonuclease P/MRP subunit (S. cerevisiae)	molecular function|hydrolase activity|IEA|GO:0016787|GOA|na//molecular function|identical protein binding|IPI|GO:0042802|GOA|15096576//molecular function|protein binding|IPI|GO:0005515|GOA|15096576//molecular function|ribonuclease MRP activity|IDA|GO:0000	Pop1	Yes	No	14	F	F	F	1	2	1	FFF12	4	No
A_23_P339119	chr12:81647397-81647449	ACSS3	NM_024560	Acyl-CoA synthetase short-chain family member 3	molecular function|ATP binding|IEA|GO:0005524|GOA|na//molecular function|acetate-CoA ligase activity|IEA|GO:0003987|GOA|na//molecular function|ligase activity|IEA|GO:0016874|GOA|na//molecular function|nucleotide binding|IEA|GO:0000166|GOA|na//biological p	Acss3	Yes	No	15	F	F	F	1	2	1	FFF12	4	No
A_24_P252934	chr11:116693887-116693946	APOA4	NM_000482	Apolipoprotein A-IV	molecular function|antioxidant activity|IDA|GO:0016209|GOA|16945374//molecular function|cholesterol transporter activity|IDA|GO:0017127|GOA|1935934//molecular function|copper ion binding|IDA|GO:0005507|GOA|16945374//molecular function|eukaryotic cell surf	Apoa4	Yes	No	16	F	F	F	2	2	1	FFF22	12	Yes	FFM	1	1
A_32_P157228	chr1:247070887-247070946	AHCTF1	NM_015446	AT hook containing transcription factor 1	molecular function|DNA binding|IEA|GO:0003677|GOA|na//biological process|cell cycle|IEA|GO:0007049|GOA|na//biological process|cytokinesis|IMP|GO:0000910|GOA|17098863//biological process|mRNA transport|IEA|GO:0051028|GOA|na//biological process|nuclear pore	Ahctf1	Yes	Yes	15	F	F	F	2	2	1	FFF22	12	No
A_24_P923757	chr12:14577680-14577739	ATF7IP	NM_018179	Activating transcription factor 7 interacting protein	molecular function|ATPase activity|IEA|GO:0016887|GOA|na//molecular function|protein binding|IPI|GO:0005515|GOA|ARRAY(0x185101c)//molecular function|transcription corepressor activity|IEA|GO:0003714|GOA|na//biological process|DNA methylation|IDA|GO:000630	Atf7ip	Yes	Yes	15	F	F	F	2	2	1	FFF22	12	No
A_23_P71064	chr7:21521603-21521662	SP4	NM_003112	Sp4 transcription factor	molecular function|RNA polymerase II transcription factor activity|TAS|GO:0003702|GOA|7559627//molecular function|metal ion binding|IEA|GO:0046872|GOA|na//molecular function|transcription coactivator activity|TAS|GO:0003713|GOA|7559627//molecular function	Sp4	Yes	Yes	14	F	F	F	2	2	1	FFF22	12	No
A_24_P58740	chr5:173377047-173377083	CPEB4	NM_030627	Cytoplasmic polyadenylation element binding protein 4	molecular function|RNA binding|IEA|GO:0003723|GOA|na//molecular function|nucleotide binding|IEA|GO:0000166|GOA|na	Cpeb4	Yes	No	15	F	F	F	2	2	1	FFF22	12	No
A_24_P290502	chr2:109087469-109087528	GCC2	NR_028063	0	0	Gcc2	Yes	No	15	F	F	F	2	2	1	FFF22	12	No
A_24_P42316	chr5:70782427-70785262	BDP1	NM_018429	B double prime 1, subunit of RNA polymerase III transcription initiation factor IIIB	molecular function|DNA binding|IEA|GO:0003677|GOA|na//biological process|regulation of transcription|IEA|GO:0045449|GOA|na//cellular component|nucleus|IEA|GO:0005634|GOA|na	Bdp1	Yes	Yes	14	F	F	F	2	2	1	FFF22	12	No
A_23_P413150	chr15:31664208-31664252	KLF13	NM_015995	Kruppel-like factor 13	molecular function|DNA binding|IEA|GO:0003677|GOA|na//molecular function|RNA polymerase II transcription factor activity|IEA|GO:0003702|GOA|na//molecular function|metal ion binding|IEA|GO:0046872|GOA|na//molecular function|protein binding|IPI|GO:0005515|G	Klf13	Yes	Yes	14	F	F	F	2	2	1	FFF22	12	No
A_24_P40968	chr15:42046675-42046734	MGA	NM_001164273	MAX gene associated	molecular function|transcription factor activity|IEA|GO:0003700|GOA|na//biological process|regulation of transcription, DNA-dependent|IEA|GO:0006355|GOA|na//cellular component|MLL1 complex|IDA|GO:0071339|GOA|15960975//cellular component|nucleus|IEA|GO:000	Mga	Yes	Yes	14	F	F	F	2	2	1	FFF22	12	No
A_23_P407583	chr19:57324385-57324444	PEG3	NM_006210	Paternally expressed 3	molecular function|metal ion binding|IEA|GO:0046872|GOA|na//molecular function|nucleic acid binding|IEA|GO:0003676|GOA|na//molecular function|transcription factor activity|IEA|GO:0003700|GOA|na//molecular function|zinc ion binding|IEA|GO:0008270|GOA|na//b	Peg3	Yes	Yes	15	F	F	F	2	2	1	FFF22	12	No
A_23_P21143	chr11:65268572-65268631	MALAT1	NR_002819	0	0	Malat1	Yes	No	15	F	F	F	2	2	1	FFF22	12	No
A_23_P149724	chr1:227598799-227598858	NUCKS1	NM_022731	Nuclear casein kinase and cyclin-dependent kinase substrate 1	cellular component|nucleus|IEA|GO:0005634|GOA|na	Nucks1	Yes	No	15	F	F	F	2	2	1	FFF22	12	No
A_23_P110569	chr5:114460701-114460760	TRIM36	NM_018700	Tripartite motif-containing 36	molecular function|ligase activity|IEA|GO:0016874|GOA|na//molecular function|metal ion binding|IEA|GO:0046872|GOA|na//molecular function|protein binding|IEA|GO:0005515|GOA|na//molecular function|zinc ion binding|IEA|GO:0008270|GOA|na//biological process|a	Trim36	Yes	No	15	F	F	N	0	0	0	FFN00	12	Yes	FFF	0	1
A_32_P83776	chr1:229462604-229462663	C1orf96	NM_145257	Chromosome 1 open reading frame 96		1700054N08Rik	No	No	16	F	F	N	0	0	0	FFN00	12	No
A_24_P750817	chr19:45130837-45130871	LOC147710	BC127929	Hypothetical LOC147710		2210010C17Rik	No	No	15	F	F	N	0	0	0	FFN00	12	No
A_24_P186324	chr15:35275132-35275191	ZNF770	NM_014106	Zinc finger protein 770	molecular function|DNA binding|IEA|GO:0003677|GOA|na//molecular function|metal ion binding|IEA|GO:0046872|GOA|na//molecular function|zinc ion binding|IEA|GO:0008270|GOA|na//biological process|regulation of transcription|IEA|GO:0045449|GOA|na//cellular component|intracellular|IEA|GO:0005622|GOA|na//cellular component|nucleus|IEA|GO:0005634|GOA|na	Zfp770	No	Yes	14	F	F	N	0	0	0	FFN00	12	No
A_24_P273857	chr8:106646515-106646574	ZFPM2	NM_012082	Zinc finger protein, multitype 2	molecular function|DNA binding|IEA|GO:0003677|GOA|na//molecular function|RNA polymerase II transcription factor activity|TAS|GO:0003702|GOA|10438528//molecular function|metal ion binding|IEA|GO:0046872|GOA|na//molecular function|transcription corepressor	Zfpm2	Yes	Yes	15	F	F	N	0	0	0	FFN00	12	No
A_23_P81017	chr4:125590315-125590374	ANKRD50	NM_020337	Ankyrin repeat domain 50	0	Ankrd50	Yes	No	16	F	F	N	0	0	0	FFN00	12	No
A_23_P116902	chr12:14982297-14982356	ART4	NM_021071	ADP-ribosyltransferase 4 (Dombrock blood group)	molecular function|NAD(P)+-protein-arginine ADP-ribosyltransferase activity|NAS|GO:0003956|GOA|9119374//molecular function|transferase activity, transferring glycosyl groups|IEA|GO:0016757|GOA|na//biological process|arginine metabolic process|NAS|GO:00065	Art4	Yes	No	14	F	F	N	0	0	0	FFN00	12	No
A_23_P254522	chr2:227870036-227870095	COL4A4	NM_000092	Collagen, type IV, alpha 4	molecular function|extracellular matrix structural constituent|IMP|GO:0005201|GOA|ARRAY(0x1d755a0)//molecular function|protein binding|IPI|GO:0005515|GOA|12878203//biological process|glomerular basement membrane development|IMP|GO:0032836|GOA|ARRAY(0x1d95	Col4a4	Yes	No	16	F	F	N	0	0	0	FFN00	12	No
A_24_P280148	chrX:41587119-41587178	GPR82	NM_080817	G protein-coupled receptor 82	molecular function|G-protein coupled receptor activity|IEA|GO:0004930|GOA|na//molecular function|receptor activity|IEA|GO:0004872|GOA|na//biological process|G-protein coupled receptor protein signaling pathway|IEA|GO:0007186|GOA|na//biological process|sig	Gpr82	Yes	No	14	F	F	N	0	0	0	FFN00	12	No
A_24_P374709	chr5:136997664-136997722	KLHL3	NM_017415	Kelch-like 3 (Drosophila)	molecular function|actin binding|IEA|GO:0003779|GOA|na//molecular function|protein binding|IEA|GO:0005515|GOA|na//molecular function|structural molecule activity|TAS|GO:0005198|GOA|10843806//cellular component|cytoplasm|IEA|GO:0005737|GOA|na//cellular com	Klhl3	Yes	No	16	F	F	N	0	0	0	FFN00	12	No
A_24_P403561	chr11:46878549-46878608	LRP4	NM_002334	Low density lipoprotein receptor-related protein 4	molecular function|calcium ion binding|NAS|GO:0005509|GOA|na//molecular function|receptor activity|IEA|GO:0004872|GOA|na//biological process|biological_process|ND|GO:0008150|GOA|na//biological process|endocytosis|IEA|GO:0006897|GOA|na//cellular component|	Lrp4	Yes	No	16	F	F	N	0	0	0	FFN00	12	No
A_24_P250765	chr10:54049984-54050026	PRKG1	NM_006258	Protein kinase, cGMP-dependent, type I	molecular function|ATP binding|IEA|GO:0005524|GOA|na//molecular function|cGMP binding|IEA|GO:0030553|GOA|na//molecular function|cGMP-dependent protein kinase activity|IEA|GO:0004692|GOA|na//molecular function|nucleotide binding|IEA|GO:0000166|GOA|na//mole	Prkg1	Yes	No	15	F	F	N	0	0	0	FFN00	12	No
A_23_P364766	chr20:10603796-10603855	C20orf94	NM_001009608	Chromosome 20 open reading frame 94	molecular function|protein binding|IPI|GO:0005515|GOA|19596235	2210009G21Rik	No	No	14	F	F	N	0	1	1	FFN01	1	No
A_23_P75630	chr11:116660206-116660265	APOA5	NM_052968	Apolipoprotein A-V	molecular function|enzyme activator activity|IDA|GO:0008047|GOA|16806135//molecular function|enzyme binding|IDA|GO:0019899|GOA|15178420//molecular function|heparin binding|IDA|GO:0008201|GOA|15878877//molecular function|heparin binding|IDA|GO:0008201|GOA|	Apoa5	Yes	No	14	F	F	N	0	2	1	FFN02	8	Yes	FFF	1	1
A_24_P333571	chr1:94667534-94667593	ARHGAP29	BC022483	Rho GTPase activating protein 29	molecular function|GTPase activator activity|IEA|GO:0005096|GOA|na//molecular function|Rho GTPase activator activity|TAS|GO:0005100|GOA|9305890//molecular function|metal ion binding|IEA|GO:0046872|GOA|na//biological process|Rho protein signal transduction	Arhgap29	Yes	No	14	F	F	N	0	2	1	FFN02	8	No
A_24_P238878	chr14:94545720-94545779	DDX24	NM_020414	DEAD (Asp-Glu-Ala-Asp) box polypeptide 24	molecular function|ATP binding|IEA|GO:0005524|GOA|na//molecular function|ATP-dependent RNA helicase activity|NAS|GO:0004004|GOA|na//molecular function|RNA binding|IEA|GO:0003723|GOA|na//molecular function|RNA helicase activity|NAS|GO:0003724|GOA|10936056/	Ddx24	Yes	No	14	F	F	N	0	2	1	FFN02	8	No
A_23_P20303	chr8:105391909-105391968	DPYS	NM_001385	Dihydropyrimidinase	molecular function|amino acid binding|IEA|GO:0016597|GOA|na//molecular function|dihydropyrimidinase activity|EXP|GO:0004157|GOA|9718352//molecular function|dihydropyrimidinase activity|IDA|GO:0004157|GOA|ARRAY(0x155d07c)//molecular function|dihydropyrimid	Dpys	Yes	No	15	F	F	N	0	2	1	FFN02	8	No
A_32_P228414	chr9:128121700-128121759	GAPVD1	NM_015635	GTPase activating protein and VPS9 domains 1	molecular function|GTPase activating protein binding|IMP|GO:0032794|GOA|16410077//molecular function|GTPase activator activity|IEA|GO:0005096|GOA|na//molecular function|guanyl-nucleotide exchange factor activity|IMP|GO:0005085|GOA|16410077//biological pro	Gapvd1	Yes	No	15	F	F	N	0	2	1	FFN02	8	No
A_23_P85980	chr1:114223890-114223949	MAGI3	NM_152900	Membrane associated guanylate kinase, WW and PDZ domain containing 3	molecular function|ATP binding|IEA|GO:0005524|GOA|na//molecular function|guanylate kinase activity|NAS|GO:0004385|GOA|10748157//molecular function|nucleotide binding|IEA|GO:0000166|GOA|na//molecular function|protein binding|IPI|GO:0005515|GOA|16316992//bi	Magi3	Yes	No	14	F	F	N	0	2	1	FFN02	8	No
A_32_P18668	chr1:52385268-52385327	RAB3B	NM_002867	RAB3B, member RAS oncogene family	molecular function|GTP binding|IEA|GO:0005525|GOA|na//molecular function|GTPase activity|TAS|GO:0003924|GOA|2501306//molecular function|nucleotide binding|IEA|GO:0000166|GOA|na//molecular function|protein binding|IEA|GO:0005515|GOA|na//biological process|	Rab3b	Yes	No	14	F	F	N	0	2	1	FFN02	8	No
A_24_P500584	chrX:73043192-73043251	XIST	NR_001564	0	0	Xist	Yes	No	16	F	F	N	0	2	1	FFN02	8	No
A_24_P319113	chr12:121613218-121613277	P2RX7	NM_002562	Purinergic receptor P2X, ligand-gated ion channel, 7	molecular function|ATP binding|IC|GO:0005524|GOA|9038151//molecular function|channel activity|IEA|GO:0015267|GOA|na//molecular function|copper ion binding|IEA|GO:0005507|GOA|na//molecular function|extracellular ATP-gated cation channel activity|IDA|GO:000	P2rx7	Yes	No	14	F	F	N	1	0	1	FFN10	5	Yes	FFM	1	1
A_32_P41127	chr5:139680086-139680145	PFDN1	NM_002622	Prefoldin subunit 1	molecular function|protein binding|IPI|GO:0005515|GOA|17353931//molecular function|transcription factor activity|TAS|GO:0003700|GOA|8744932//molecular function|unfolded protein binding|IEA|GO:0051082|GOA|na//biological process|cell cycle|TAS|GO:0007049|GO	Pfdn1	Yes	Yes	15	F	F	N	1	0	1	FFN10	5	No
A_24_P100419	chrX:69176919-69176978	EDA	NM_001399	Ectodysplasin A	molecular function|protein binding|IPI|GO:0005515|GOA|ARRAY(0x1cbe0b8)//molecular function|receptor binding|IDA|GO:0005102|GOA|11039935//molecular function|tumor necrosis factor receptor binding|IEA|GO:0005164|GOA|na//biological process|cell differentiati	Eda	Yes	No	14	F	F	N	1	0	1	FFN10	5	No
A_23_P122127	chr5:39122467-39122505	FYB	NM_199335	FYN binding protein (FYB-120/130)	molecular function|protein binding|IPI|GO:0005515|GOA|ARRAY(0x1cc1708)//biological process|NLS-bearing substrate import into nucleus|TAS|GO:0006607|GOA|9207119//biological process|immune response|TAS|GO:0006955|GOA|9207119//biological process|protein amin	Fyb	Yes	No	14	F	F	N	1	0	1	FFN10	5	No
A_23_P97481	chr1:84356004-84356037	TTLL7	NM_024686	Tubulin tyrosine ligase-like family, member 7	molecular function|ligase activity|IEA|GO:0016874|GOA|na//molecular function|tubulin-tyrosine ligase activity|IEA|GO:0004835|GOA|na//biological process|cell differentiation|IEA|GO:0030154|GOA|na//biological process|multicellular organismal development|IEA	Ttll7	Yes	No	16	F	F	N	1	0	1	FFN10	5	No
A_23_P4014	chr17:2203709-2203767	SMG6	NM_017575	Smg-6 homolog, nonsense mediated mRNA decay factor (C. elegans)	molecular function|DNA binding|IEA|GO:0003677|GOA|na//molecular function|endonuclease activity|IEA|GO:0004519|GOA|na//molecular function|hydrolase activity|IEA|GO:0016787|GOA|na//molecular function|metal ion binding|IEA|GO:0046872|GOA|na//molecular functi	Smg6	Yes	Yes	15	F	F	N	1	1	1	FFN11	13	Yes	FFF	1	1
A_24_P185709	chr20:34820431-34820490	EPB41L1	NM_177996	Erythrocyte membrane protein band 4.1-like 1	molecular function|actin binding|IEA|GO:0003779|GOA|na//molecular function|binding|IEA|GO:0005488|GOA|na//molecular function|structural molecule activity|IEA|GO:0005198|GOA|na//biological process|cortical actin cytoskeleton organization|IEA|GO:0030866|GOA|na//cellular component|cytoplasm|IEA|GO:0005737|GOA|na//cellular component|cytoskeleton|IEA|GO:0005856|GOA|na//cellular component|cytosol|EXP|G…	Epb4.1l1	No	No	14	F	F	N	1	1	1	FFN11	13	Yes	FFM	1	1
A_24_P274795	chr7:21940832-21940891	CDCA7L	NM_018719	Cell division cycle associated 7-like	molecular function|protein binding|IDA|GO:0005515|GOA|15994933//biological process|positive regulation of cell proliferation|IDA|GO:0008284|GOA|15994933//biological process|regulation of transcription|IEA|GO:0045449|GOA|na//cellular component|cytoplasm|IE	Cdca7l	Yes	Yes	14	F	F	N	1	1	1	FFN11	13	No
A_24_P288979	chr12:102158488-102158547	GNPTAB	NM_024312	N-acetylglucosamine-1-phosphate transferase, alpha and beta subunits	molecular function|UDP-N-acetylglucosamine-lysosomal-enzyme N-acetylglucosaminephosphotransferase activity|IEA|GO:0003976|GOA|na//molecular function|metal ion binding|IEA|GO:0046872|GOA|na//molecular function|transcription factor binding|IEA|GO:0008134|GO	Gnptab	Yes	Yes	16	F	F	N	1	1	1	FFN11	13	No
A_23_P316511	chr17:46627302-46627361	HOXB3	NM_002146	Homeobox B3	molecular function|sequence-specific DNA binding|IEA|GO:0043565|GOA|na//molecular function|transcription factor activity|IEA|GO:0003700|GOA|na//biological process|anterior/posterior pattern formation|IEA|GO:0009952|GOA|na//biological process|cartilage dev	Hoxb3	Yes	Yes	14	F	F	N	1	1	1	FFN11	13	No
A_24_P25252	chr18:9258575-9258634	ANKRD12	NM_015208	Ankyrin repeat domain 12	cellular component|nucleus|IEA|GO:0005634|GOA|na	Ankrd12	Yes	No	15	F	F	N	1	1	1	FFN11	13	No
A_23_P17269	chr2:55562234-55562293	CCDC88A	NM_018084	Coiled-coil domain containing 88A	molecular function|actin binding|IDA|GO:0003779|GOA|16139227//molecular function|microtubule binding|ISS|GO:0008017|GOA|na//molecular function|phosphoinositide binding|IDA|GO:0035091|GOA|16139227//molecular function|protein homodimerization activity|IPI|G	Ccdc88a	Yes	No	14	F	F	N	1	1	1	FFN11	13	No
A_23_P134085	chr6:154726549-154726608	CNKSR3	NM_173515	CNKSR family member 3	molecular function|protein binding|IEA|GO:0005515|GOA|na//biological process|regulation of signal transduction|IEA|GO:0009966|GOA|na//cellular component|cytoplasm|IEA|GO:0005737|GOA|na//cellular component|membrane|IEA|GO:0016020|GOA|na	Cnksr3	Yes	No	15	F	F	N	1	1	1	FFN11	13	No
A_24_P936589	chr10:12163305-12163364	DHTKD1	NM_018706	Dehydrogenase E1 and transketolase domain containing 1	molecular function|oxidoreductase activity|IEA|GO:0016491|GOA|na//molecular function|oxoglutarate dehydrogenase (succinyl-transferring) activity|IEA|GO:0004591|GOA|na//molecular function|thiamin pyrophosphate binding|IEA|GO:0030976|GOA|na//biological proc	Dhtkd1	Yes	No	15	F	F	N	1	1	1	FFN11	13	No
A_24_P222300	chr5:131014839-131014870	FNIP1	NM_133372	Folliculin interacting protein 1	cellular component|cytoplasm|IEA|GO:0005737|GOA|na	Fnip1	Yes	No	15	F	F	N	1	1	1	FFN11	13	No
A_24_P237278	chr22:29956723-29956756	NIPSNAP1	NM_003634	Nipsnap homolog 1 (C. elegans)	cellular component|mitochondrial inner membrane|IEA|GO:0005743|GOA|na//cellular component|mitochondrion|ISS|GO:0005739|GOA|na	Nipsnap1	Yes	No	14	F	F	N	1	1	1	FFN11	13	No
A_23_P121637	chr4:119202957-119203016	PRSS12	NM_003619	Protease, serine, 12 (neurotrypsin, motopsin)	molecular function|peptidase activity|IEA|GO:0008233|GOA|na//molecular function|scavenger receptor activity|IEA|GO:0005044|GOA|na//molecular function|serine-type endopeptidase activity|IEA|GO:0004252|GOA|na//molecular function|serine-type peptidase activi	Prss12	Yes	No	15	F	F	N	1	1	1	FFN11	13	No
A_24_P220786	chr4:3429829-3429888	RGS12	NM_198229	Regulator of G-protein signaling 12	molecular function|GTPase activator activity|IEA|GO:0005096|GOA|na//molecular function|GTPase regulator activity|IDA|GO:0030695|GOA|9651375//molecular function|protein binding|IEA|GO:0005515|GOA|na//molecular function|receptor signaling protein activity|I	Rgs12	Yes	No	16	F	F	N	1	1	1	FFN11	13	No
A_23_P364625	chr9:26993718-26993777	LRRC19	NM_022901	Leucine rich repeat containing 19	cellular component|integral to membrane|IEA|GO:0016021|GOA|na//cellular component|membrane|IEA|GO:0016020|GOA|na	Lrrc19	Yes	No	15	F	F	N	1	2	1	FFN12	1	No
A_24_P102512	chr22:24452654-24452705	CABIN1	NM_012295	Calcineurin binding protein 1	molecular function|binding|IEA|GO:0005488|GOA|na//molecular function|phosphoprotein phosphatase inhibitor activity|NAS|GO:0004864|GOA|9655484//molecular function|protein phosphatase 2B binding|IEA|GO:0030346|GOA|na//biological process|cell surface recepto	Cabin1	Yes	No	15	F	F	N	2	0	1	FFN20	2	No
A_24_P360993	chr12:10233888-10233947	CLEC1A	NM_016511	C-type lectin domain family 1, member A	molecular function|binding|IEA|GO:0005488|GOA|na//molecular function|sugar binding|IEA|GO:0005529|GOA|na//molecular function|transmembrane receptor activity|TAS|GO:0004888|GOA|10671229//biological process|cell surface receptor linked signaling pathway|TAS	Clec1a	Yes	No	14	F	F	N	2	0	1	FFN20	2	No
A_23_P353652	chr15:100253342-100253401	MEF2A	NM_005587	Myocyte enhancer factor 2A	molecular function|protein binding|IPI|GO:0005515|GOA|16043483//molecular function|protein binding|IPI|GO:0005515|GOA|16043483//molecular function|sequence-specific DNA binding|IEA|GO:0043565|GOA|na//molecular function|transcription factor activity|IDA|GO	Mef2a	Yes	Yes	14	F	F	N	2	2	1	FFN22	5	No
A_24_P282172	chr14:92506309-92506368	TRIP11	NM_004239	Thyroid hormone receptor interactor 11	molecular function|protein binding|IPI|GO:0005515|GOA|17438371//molecular function|transcription coactivator activity|TAS|GO:0003713|GOA|9256431//biological process|transcription from RNA polymerase II promoter|TAS|GO:0006366|GOA|9256431//cellular compone	Trip11	Yes	Yes	15	F	F	N	2	2	1	FFN22	5	No
A_24_P32411	chr8:68007870-68007929	CSPP1	NM_024790	Centrosome and spindle pole associated protein 1	cellular component|cytoplasm|IEA|GO:0005737|GOA|na//cellular component|cytoskeleton|IEA|GO:0005856|GOA|na//cellular component|microtubule|IEA|GO:0005874|GOA|na//cellular component|microtubule organizing center|IEA|GO:0005815|GOA|na//cellular component|spi	Cspp1	Yes	No	16	F	F	N	2	2	1	FFN22	5	No
A_24_P915300	chr1:85648640-85648699	SYDE2	NM_032184	Synapse defective 1, Rho GTPase, homolog 2 (C. elegans)	molecular function|GTPase activator activity|IEA|GO:0005096|GOA|na//molecular function|Rho GTPase activator activity|ISS|GO:0005100|GOA|na//biological process|activation of Rho GTPase activity|ISS|GO:0032862|GOA|na//biological process|signal transduction|	Syde2	Yes	No	14	F	F	N	2	2	1	FFN22	5	No
A_24_P105733	chr2:218747097-218747136	TNS1	NM_022648	Tensin 1	molecular function|actin binding|IEA|GO:0003779|GOA|na//molecular function|protein binding|IPI|GO:0005515|GOA|17190795//biological process|cell migration|IEA|GO:0016477|GOA|na//biological process|cell-substrate junction assembly|IEA|GO:0007044|GOA|na//cel	Tns1	Yes	No	15	F	F	N	2	2	1	FFN22	5	No
A_24_P364412	chr12:80190702-80191005	PPP1R12A	NM_002480	Protein phosphatase 1, regulatory (inhibitor) subunit 12A	molecular function|phosphoprotein phosphatase activity|IEA|GO:0004721|GOA|na//molecular function|protein binding|IPI|GO:0005515|GOA|ARRAY(0x2e94d70)//molecular function|signal transducer activity|NAS|GO:0004871|GOA|8662509//cellular component|cytoplasm|IE	Ppp1r12a	Yes	No	14	F	N	F	0	0	0	FNF00	36	Yes	FFF	0	0
A_24_P83379	chr4:85730135-85730194	WDFY3	NM_178583	WD repeat and FYVE domain containing 3	molecular function|beta-N-acetylglucosaminylglycopeptide beta-1,4-galactosyltransferase activity|IEA|GO:0003831|GOA|na//molecular function|binding|IEA|GO:0005488|GOA|na//molecular function|metal ion binding|IEA|GO:0046872|GOA|na//molecular function|phosph	Wdfy3	Yes	No	14	F	N	F	0	0	0	FNF00	36	Yes	FFF	0	0
A_23_P323930	chr4:99393408-99393467	TSPAN5	NM_005723	Tetraspanin 5	cellular component|integral to membrane|IEA|GO:0016021|GOA|na//cellular component|membrane|IEA|GO:0016020|GOA|na	Tspan5	Yes	No	15	F	N	F	0	0	0	FNF00	36	Yes	FFF	0	0
A_24_P213494	chr10:129854387-129854429	PTPRE	NM_130435	Protein tyrosine phosphatase, receptor type, E	molecular function|hydrolase activity|IEA|GO:0016787|GOA|na//molecular function|protein binding|IPI|GO:0005515|GOA|ARRAY(0x2e8cba0)//molecular function|protein homodimerization activity|IEA|GO:0042803|GOA|na//molecular function|transmembrane receptor prot	Ptpre	Yes	No	14	F	N	F	0	0	0	FNF00	36	Yes	FFF	0	1
A_23_P25305	chr12:103353454-103353513	ASCL1	NM_004316	Achaete-scute complex homolog 1 (Drosophila)	molecular function|E-box binding|IDA|GO:0070888|GOA|ARRAY(0xc7a5d0)//molecular function|bHLH transcription factor binding|IPI|GO:0043425|GOA|ARRAY(0x19c8358)//molecular function|protein binding|IPI|GO:0005515|GOA|10903890//molecular function|sequence-spec	Ascl1	Yes	Yes	16	F	N	F	0	0	0	FNF00	36	Yes	FFF	0	1
A_23_P29922	chr4:187005890-187005949	TLR3	NM_003265	Toll-like receptor 3	molecular function|double-stranded RNA binding|IDA|GO:0003725|GOA|16111635//molecular function|double-stranded RNA binding|NAS|GO:0003725|GOA|12054664//molecular function|protein binding|IEA|GO:0005515|GOA|na//molecular function|receptor activity|TAS|GO:0	Tlr3	Yes	No	14	F	N	F	0	0	0	FNF00	36	Yes	FFF	0	1
A_23_P92623	chr4:101946679-101946738	PPP3CA	NM_001130692	Protein phosphatase 3, catalytic subunit, alpha isozyme	molecular function|calcium ion binding|NAS|GO:0005509|GOA|8392375//molecular function|calcium-dependent protein serine/threonine phosphatase activity|IEA|GO:0004723|GOA|na//molecular function|calmodulin binding|NAS|GO:0005516|GOA|8392375//molecular functi	Ppp3ca	Yes	No	15	F	N	F	0	0	0	FNF00	36	Yes	FFF	0	1
A_23_P205778	chr15:52414848-52414907	GNB5	NM_016194	Guanine nucleotide binding protein (G protein), beta 5	molecular function|GTPase activity|NAS|GO:0003924|GOA|9606987//molecular function|protein binding|IEA|GO:0005515|GOA|na//molecular function|signal transducer activity|NAS|GO:0004871|GOA|9606987//biological process|G-protein coupled receptor protein signal	Gnb5	Yes	No	14	F	N	F	0	0	0	FNF00	36	Yes	FFF	0	1
A_24_P196298	chr11:118354935-118354994	MLL	NM_005933	Myeloid/lymphoid or mixed-lineage leukemia (trithorax homolog, Drosophila)	molecular function|AT DNA binding|NAS|GO:0003680|GOA|1423624//molecular function|RNA polymerase II transcription factor activity|TAS|GO:0003702|GOA|10821850//molecular function|chromatin binding|IEA|GO:0003682|GOA|na//molecular function|histone acetyl-lysine binding|IDA|GO:0070577|GOA|19187761//molecular function|histone methyltransferase activity (H3-K4 specific)|IDA|GO:0042800|GOA|ARRAY(0xf4a99…	Mll1	No	Yes	14	F	N	F	0	0	0	FNF00	36	Yes	FFM	0	1
A_23_P45140	chr12:25362271-25362330	KRAS	NM_033360	V-Ki-ras2 Kirsten rat sarcoma viral oncogene homolog	molecular function|GDP binding|IEA|GO:0019003|GOA|na//molecular function|GMP binding|IEA|GO:0019002|GOA|na//molecular function|GTP binding|IEA|GO:0005525|GOA|na//molecular function|GTPase activity|IEA|GO:0003924|GOA|na//molecular function|LRR domain bindi	Kras	Yes	No	16	F	N	F	0	0	0	FNF00	36	Yes	FFM	0	1
A_24_P22174	chr14:104057419-104057478	C14orf153	BC007412	Chromosome 14 open reading frame 153		2810002N01Rik	No	No	14	F	N	F	0	0	0	FNF00	36	No
A_23_P206920	chr16:15797952-15808796	MYH11	NM_022844	Myosin, heavy chain 11, smooth muscle	molecular function|ATP binding|IEA|GO:0005524|GOA|na//molecular function|actin binding|IEA|GO:0003779|GOA|na//molecular function|calmodulin binding|IEA|GO:0005516|GOA|na//molecular function|motor activity|IEA|GO:0003774|GOA|na//molecular function|nucleoti	Myh11	Yes	No	14	F	N	F	0	0	0	FNF00	36	No
A_24_P348925	chr14:99959862-99959921	CCNK	NM_003858	Cyclin K	molecular function|protein binding|IPI|GO:0005515|GOA|16713569//biological process|cell cycle|IEA|GO:0007049|GOA|na//biological process|cell division|IEA|GO:0051301|GOA|na//biological process|mitosis|IEA|GO:0007067|GOA|na//biological process|regulation of	Ccnk	Yes	No	14	F	N	F	0	0	0	FNF00	36	No
A_23_P20622	chr9:99264992-99265049	CDC14B	NM_033331	CDC14 cell division cycle 14 homolog B (S. cerevisiae)	molecular function|hydrolase activity|IEA|GO:0016787|GOA|na//molecular function|protein binding|IPI|GO:0005515|GOA|18662541//molecular function|protein serine/threonine phosphatase activity|IDA|GO:0004722|GOA|9367992//molecular function|protein tyrosine p	Cdc14b	Yes	No	14	F	N	F	0	0	0	FNF00	36	No
A_23_P52738	chr11:126215496-126215555	DCPS	NM_014026	Decapping enzyme, scavenger	molecular function|hydrolase activity|IEA|GO:0016787|GOA|na//molecular function|protein binding|IPI|GO:0005515|GOA|16140270//biological process|deadenylation-dependent decapping of nuclear-transcribed mRNA|IEA|GO:0000290|GOA|na//biological process|nuclear	Dcps	Yes	No	15	F	N	F	0	0	0	FNF00	36	No
A_24_P391468	chrX:129790605-129790664	ENOX2	NM_182314	Ecto-NOX disulfide-thiol exchanger 2	molecular function|nucleic acid binding|IEA|GO:0003676|GOA|na//molecular function|nucleotide binding|IEA|GO:0000166|GOA|na//molecular function|oxidoreductase activity|IEA|GO:0016491|GOA|na//molecular function|protein disulfide oxidoreductase activity|IDA|	Enox2	Yes	No	14	F	N	F	0	0	0	FNF00	36	No
A_24_P93967	chrX:147014095-147014243	FMR1	NM_002024	Fragile X mental retardation 1	molecular function|RNA binding|TAS|GO:0003723|GOA|8156595//molecular function|mRNA binding|TAS|GO:0003729|GOA|7692601//molecular function|protein binding|IPI|GO:0005515|GOA|ARRAY(0xb49130)//biological process|mRNA transport|IEA|GO:0051028|GOA|na//biologic	Fmr1	Yes	No	14	F	N	F	0	0	0	FNF00	36	No
A_32_P145276	chr1:201846689-201846748	IPO9	NM_018085	Importin 9	molecular function|histone binding|ISS|GO:0042393|GOA|na//molecular function|protein binding|IPI|GO:0005515|GOA|ARRAY(0x29e8420)//molecular function|protein transporter activity|IDA|GO:0008565|GOA|11823430//biological process|intracellular protein transpo	Ipo9	Yes	No	15	F	N	F	0	0	0	FNF00	36	No
A_23_P510	chr1:242252899-242252958	PLD5	NM_152666	Phospholipase D family, member 5	molecular function|catalytic activity|IEA|GO:0003824|GOA|na//biological process|metabolic process|IEA|GO:0008152|GOA|na//cellular component|integral to membrane|IEA|GO:0016021|GOA|na//cellular component|membrane|IEA|GO:0016020|GOA|na	Pld5	Yes	No	14	F	N	F	0	0	0	FNF00	36	No
A_23_P358928	chr7:87837829-87837888	SRI	NM_198901	Sorcin	molecular function|calcium channel regulator activity|TAS|GO:0005246|GOA|9668070//molecular function|calcium ion binding|IEA|GO:0005509|GOA|na//molecular function|receptor binding|TAS|GO:0005102|GOA|9668070//biological process|calcium ion transport|IEA|GO	Sri	Yes	No	16	F	N	F	0	0	0	FNF00	36	No
A_24_P924040	chr2:182765454-182765513	SSFA2	NM_006751	Sperm specific antigen 2	molecular function|actin binding|IEA|GO:0003779|GOA|na//cellular component|cytoplasm|IEA|GO:0005737|GOA|na//cellular component|plasma membrane|NAS|GO:0005886|GOA|1555770	Ssfa2	Yes	No	14	F	N	F	0	0	0	FNF00	36	No
A_32_P140898	chr2:48602485-48602544	FOXN2	NM_002158	Forkhead box N2	molecular function|sequence-specific DNA binding|IEA|GO:0043565|GOA|na//molecular function|transcription factor activity|IEA|GO:0003700|GOA|na//biological process|regulation of transcription, DNA-dependent|IEA|GO:0006355|GOA|na//cellular component|cytopla	Foxn2	Yes	Yes	16	F	N	F	0	0	0	FNF00	36	No
A_23_P143029	chr2:176973811-176973870	HOXD11	NM_021192	Homeobox D11	molecular function|sequence-specific DNA binding|IEA|GO:0043565|GOA|na//molecular function|transcription factor activity|NAS|GO:0003700|GOA|na//biological process|anterior/posterior pattern formation|IEA|GO:0009952|GOA|na//biological process|branching inv	Hoxd11	Yes	Yes	14	F	N	F	0	0	0	FNF00	36	No
A_32_P164649	chr19:5626414-5626465	SAFB	NM_002967	Scaffold attachment factor B	molecular function|DNA binding|IEA|GO:0003677|GOA|na//molecular function|RNA binding|IEA|GO:0003723|GOA|na//molecular function|double-stranded DNA binding|TAS|GO:0003690|GOA|1324173//molecular function|nucleotide binding|IEA|GO:0000166|GOA|na//molecular f	Safb	Yes	Yes	14	F	N	F	0	0	0	FNF00	36	No
A_23_P21219	chr3:47125412-47125471	SETD2	NM_014159	SET domain containing 2	molecular function|DNA binding|IEA|GO:0003677|GOA|na//molecular function|histone-lysine N-methyltransferase activity|IEA|GO:0018024|GOA|na//molecular function|methyltransferase activity|IEA|GO:0008168|GOA|na//molecular function|oxidoreductase activity|IEA	Setd2	Yes	Yes	15	F	N	F	0	0	0	FNF00	36	No
A_24_P153800	chr14:21834655-21836453	SUPT16H	NM_007192	Suppressor of Ty 16 homolog (S. cerevisiae)	molecular function|positive transcription elongation factor activity|TAS|GO:0008159|GOA|10421373//biological process|DNA repair|IEA|GO:0006281|GOA|na//biological process|DNA replication|IEA|GO:0006260|GOA|na//biological process|cellular process|IEA|GO:000	Supt16h	Yes	Yes	16	F	N	F	0	0	0	FNF00	36	No
A_23_P41970	chr5:76331493-76331552	AGGF1	NM_018046	Angiogenic factor with G patch and FHA domains 1	molecular function|eukaryotic cell surface binding|IDA|GO:0043499|GOA|14961121//molecular function|nucleic acid binding|IEA|GO:0003676|GOA|na//molecular function|protein binding|IPI|GO:0005515|GOA|14961121//biological process|RNA processing|TAS|GO:0006396	Aggf1	Yes	No	15	F	N	F	0	0	0	FNF00	36	No
A_24_P936171	chr1:15899400-15899459	AGMAT	NM_024758	Agmatine ureohydrolase (agmatinase)	molecular function|agmatinase activity|IEA|GO:0008783|GOA|na//molecular function|hydrolase activity|IEA|GO:0016787|GOA|na//molecular function|metal ion binding|IEA|GO:0046872|GOA|na//biological process|putrescine biosynthetic process|IEA|GO:0009446|GOA|na	Agmat	Yes	No	15	F	N	F	0	0	0	FNF00	36	No
A_23_P351320	chr6:110550035-110550094	CDC40	NM_015891	Cell division cycle 40 homolog (S. cerevisiae)	biological process|RNA splicing|EXP|GO:0008380|GOA|12226669//biological process|mRNA processing|IEA|GO:0006397|GOA|na//cellular component|nucleus|IEA|GO:0005634|GOA|na//cellular component|spliceosomal complex|IEA|GO:0005681|GOA|na	Cdc40	Yes	No	15	F	N	F	0	0	0	FNF00	36	No
A_23_P210323	chr2:65311378-65311437	CEP68	NM_015147	Centrosomal protein 68kDa	cellular component|cytoplasm|IEA|GO:0005737|GOA|na//cellular component|cytoskeleton|IEA|GO:0005856|GOA|na//cellular component|microtubule organizing center|IEA|GO:0005815|GOA|na	Cep68	Yes	No	16	F	N	F	0	0	0	FNF00	36	No
A_23_P40217	chr20:53267203-53267262	DOK5	NM_018431	Docking protein 5	molecular function|insulin receptor binding|IEA|GO:0005158|GOA|na//molecular function|transmembrane receptor protein tyrosine kinase signaling protein activity|IEA|GO:0005066|GOA|na//biological process|MAPKKK cascade|IEA|GO:0000165|GOA|na//biological proc	Dok5	Yes	No	16	F	N	F	0	0	0	FNF00	36	No
A_24_P298334	chr8:25292909-25292968	KCTD9	NM_017634	Potassium channel tetramerisation domain containing 9	molecular function|protein binding|IEA|GO:0005515|GOA|na//molecular function|voltage-gated potassium channel activity|IEA|GO:0005249|GOA|na//biological process|potassium ion transport|IEA|GO:0006813|GOA|na//cellular component|membrane|IEA|GO:0016020|GOA|n	Kctd9	Yes	No	15	F	N	F	0	0	0	FNF00	36	No
A_23_P73170	chr4:119174713-119174756	NDST3	NM_004784	N-deacetylase/N-sulfotransferase (heparan glucosaminyl) 3	molecular function|[heparan sulfate]-glucosamine N-sulfotransferase activity|IEA|GO:0015016|GOA|na//molecular function|hydrolase activity|IEA|GO:0016787|GOA|na//molecular function|sulfotransferase activity|IEA|GO:0008146|GOA|na//molecular function|transfe	Ndst3	Yes	No	14	F	N	F	0	0	0	FNF00	36	No
A_23_P212974	chr4:146059176-146059235	OTUD4	NM_199324	OTU domain containing 4	molecular function|molecular_function|ND|GO:0003674|GOA|na//molecular function|protein binding|IPI|GO:0005515|GOA|17353931//biological process|biological_process|ND|GO:0008150|GOA|na//cellular component|cellular_component|ND|GO:0005575|GOA|na	Otud4	Yes	No	14	F	N	F	0	0	0	FNF00	36	No
A_24_P405313	chr2:172666738-172666787	SLC25A12	NM_003705	Solute carrier family 25 (mitochondrial carrier, Aralar), member 12	molecular function|L-aspartate transmembrane transporter activity|IDA|GO:0015183|GOA|11566871//molecular function|L-glutamate transmembrane transporter activity|IDA|GO:0005313|GOA|11566871//molecular function|calcium ion binding|IDA|GO:0005509|GOA|9722566	Slc25a12	Yes	No	15	F	N	F	0	0	0	FNF00	36	No
A_24_P322771	chr21:43783440-43783499	TFF1	NM_003225	Trefoil factor 1	molecular function|growth factor activity|IEA|GO:0008083|GOA|na//biological process|carbohydrate metabolic process|TAS|GO:0005975|GOA|2303034//biological process|digestion|NAS|GO:0007586|GOA|9043862//biological process|maintenance of gastrointestinal epit	Tff1	Yes	No	14	F	N	F	0	0	0	FNF00	36	No
A_23_P133691	chr6:90087390-90087437	RRAGD	NM_021244	Ras-related GTP binding D	molecular function|GTP binding|IEA|GO:0005525|GOA|na//molecular function|nucleotide binding|IEA|GO:0000166|GOA|na//molecular function|protein binding|IPI|GO:0005515|GOA|ARRAY(0x199087c)//molecular function|protein heterodimerization activity|IPI|GO:004698	Rragd	Yes	No	15	F	N	F	0	1	1	FNF01	10	Yes	FFF	1	0
A_32_P74643	chr3:105086223-105086282	ALCAM	NM_001627	Activated leukocyte cell adhesion molecule	molecular function|receptor binding|TAS|GO:0005102|GOA|7760007//biological process|cell adhesion|IEA|GO:0007155|GOA|na//biological process|motor axon guidance|IEA|GO:0008045|GOA|na//biological process|signal transduction|TAS|GO:0007165|GOA|7760007//cellul	Alcam	Yes	No	15	F	N	F	0	1	1	FNF01	10	Yes	FFF	1	1
A_24_P32887	chr9:136901175-136901234	BRD3	NM_007371	Bromodomain containing 3	molecular function|molecular_function|ND|GO:0003674|GOA|na//biological process|biological_process|ND|GO:0008150|GOA|na//cellular component|nucleus|NAS|GO:0005634|GOA|na	Brd3	Yes	No	15	F	N	F	0	1	1	FNF01	10	Yes	FFM	1	0
A_24_P136807	chr4:39313078-39313137	RFC1	NM_002913	Replication factor C (activator 1) 1, 145kDa	molecular function|ATP binding|IEA|GO:0005524|GOA|na//molecular function|DNA clamp loader activity|IEA|GO:0003689|GOA|na//molecular function|enzyme activator activity|TAS|GO:0008047|GOA|8954124//molecular function|nucleoside-triphosphatase activity|IEA|GO	Rfc1	Yes	No	15	F	N	F	0	1	1	FNF01	10	Yes	FFM	1	0
A_24_P396489	chr1:16722865-16722924	C1orf144	NM_015609	Chromosome 1 open reading frame 144		D4Ertd22e	No	No	16	F	N	F	0	1	1	FNF01	10	No
A_23_P384512	chr10:45498789-45498848	ZNF22	NM_006963	Zinc finger protein 22 (KOX 15)	molecular function|DNA binding|ISS|GO:0003677|GOA|na//molecular function|metal ion binding|IEA|GO:0046872|GOA|na//molecular function|zinc ion binding|IEA|GO:0008270|GOA|na//biological process|odontogenesis|NAS|GO:0042476|GOA|14630903//biological process|regulation of transcription|NAS|GO:0045449|GOA|14630903//cellular component|cytoplasm|IDA|GO:0005737|GOA|18029348//cellular component|intracellul…	Zfp422	No	Yes	14	F	N	F	0	1	1	FNF01	10	No
A_23_P39137	chr19:47425093-47425152	GRLF1	NM_004491	Glucocorticoid receptor DNA binding factor 1	molecular function|DNA binding|IEA|GO:0003677|GOA|na//molecular function|GTPase activator activity|IEA|GO:0005096|GOA|na//molecular function|Rho GTPase activator activity|EXP|GO:0005100|GOA|16188938//molecular function|transcription corepressor activity|T	Grlf1	Yes	Yes	14	F	N	F	0	1	1	FNF01	10	No
A_23_P420610	chr5:72286310-72286369	FCHO2	NM_138782	FCH domain only 2	0	Fcho2	Yes	No	14	F	N	F	0	1	1	FNF01	10	No
A_24_P163632	chr8:107719096-107719155	OXR1	NM_181354	Oxidation resistance 1	molecular function|molecular_function|ND|GO:0003674|GOA|na//biological process|cell wall macromolecule catabolic process|IEA|GO:0016998|GOA|na//biological process|response to oxidative stress|NAS|GO:0006979|GOA|11114193//cellular component|cellular_compon	Oxr1	Yes	No	15	F	N	F	0	1	1	FNF01	10	No
A_23_P56640	chr2:70504199-70504258	PCYOX1	NM_016297	Prenylcysteine oxidase 1	molecular function|binding|IEA|GO:0005488|GOA|na//molecular function|chloride-transporting ATPase activity|IEA|GO:0008555|GOA|na//molecular function|oxidoreductase activity|IEA|GO:0016491|GOA|na//molecular function|prenylcysteine oxidase activity|IDA|GO:0	Pcyox1	Yes	No	15	F	N	F	0	1	1	FNF01	10	No
A_23_P425704	chr17:37563012-37563071	MED1	NM_004774	Mediator complex subunit 1	molecular function|DNA binding|IEA|GO:0003677|GOA|na//molecular function|RNA polymerase II transcription mediator activity|IDA|GO:0016455|GOA|10198638//molecular function|chromatin binding|IEA|GO:0003682|GOA|na//molecular function|ligand-dependent nuclear	Med1	Yes	Yes	14	F	N	F	0	2	1	FNF02	8	Yes	FFF	1	1
A_23_P139950	chr13:50279783-50279842	KPNA3	NM_002267	Karyopherin alpha 3 (importin alpha 4)	molecular function|nuclear localization sequence binding|TAS|GO:0008139|GOA|9435235//molecular function|protein C-terminus binding|IEA|GO:0008022|GOA|na//molecular function|protein binding|IPI|GO:0005515|GOA|ARRAY(0x13cfb10)//molecular function|protein tr	Kpna3	Yes	No	16	F	N	F	0	2	1	FNF02	8	Yes	FFM	1	1
A_32_P11899	chr12:123738360-123738419	C12orf65	NM_152269	Chromosome 12 open reading frame 65	molecular function|translation release factor activity|IEA|GO:0003747|GOA|na//biological process|translational termination|IEA|GO:0006415|GOA|na	2810006K23Rik	No	No	14	F	N	F	0	2	1	FNF02	8	No
A_24_P144481	chr3:14697032-14697091	C3orf19	NM_016474	Chromosome 3 open reading frame 19		C130022K22Rik	No	No	15	F	N	F	0	2	1	FNF02	8	No
A_32_P228775	chr3:197361279-197361336	PPP4R2	NM_174907	Protein phosphatase 4, regulatory subunit 2	molecular function|protein binding|IPI|GO:0005515|GOA|18715871//biological process|RNA splicing|IEA|GO:0008380|GOA|na//biological process|mRNA processing|IEA|GO:0006397|GOA|na//biological process|protein modification process|TAS|GO:0006464|GOA|10769191//c	Ppp4r2	Yes	No	14	F	N	F	0	2	1	FNF02	8	No
A_24_P111009	chr19:5613475-5613511	SAFB2	NM_014649	Scaffold attachment factor B2	molecular function|DNA binding|IEA|GO:0003677|GOA|na//molecular function|RNA binding|IEA|GO:0003723|GOA|na//molecular function|nucleotide binding|IEA|GO:0000166|GOA|na//molecular function|protein binding|IPI|GO:0005515|GOA|12660241//biological process|reg	Safb2	Yes	Yes	14	F	N	F	0	2	1	FNF02	8	No
A_24_P290527	chrX:24225504-24225563	ZFX	NM_003410	Zinc finger protein, X-linked	molecular function|DNA binding|IEA|GO:0003677|GOA|na//molecular function|metal ion binding|IEA|GO:0046872|GOA|na//molecular function|transcription coactivator activity|TAS|GO:0003713|GOA|2105457//molecular function|transcription regulator activity|IEA|GO:	Zfx	Yes	Yes	16	F	N	F	0	2	1	FNF02	8	No
A_32_P206949	chr2:62727915-62727974	TMEM17	NM_198276	Transmembrane protein 17	cellular component|integral to membrane|IEA|GO:0016021|GOA|na//cellular component|membrane|IEA|GO:0016020|GOA|na	Tmem17	Yes	No	14	F	N	F	0	2	1	FNF02	8	No
A_23_P133236	chr5:140605528-140605587	PCDHB14	NM_018934	Protocadherin beta 14	molecular function|calcium ion binding|IEA|GO:0005509|GOA|na//molecular function|protein binding|IEA|GO:0005515|GOA|na//biological process|calcium-dependent cell-cell adhesion|NAS|GO:0016339|GOA|11322959//biological process|cell adhesion|IEA|GO:0007155|GOA|na//biological process|homophilic cell adhesion|IEA|GO:0007156|GOA|na//biological process|synapse assembly|TAS|GO:0007416|GOA|12231349//biolog…	Pcdhb20	No	No	14	F	N	F	1	0	1	FNF10	10	Yes	FFF	1	0
A_23_P8297	chr6:108025643-108025702	SCML4	NM_198081	Sex comb on midleg-like 4 (Drosophila)	molecular function|DNA binding|IEA|GO:0003677|GOA|na//biological process|regulation of transcription|IEA|GO:0045449|GOA|na//cellular component|nucleus|IEA|GO:0005634|GOA|na	Scml4	Yes	Yes	15	F	N	F	1	0	1	FNF10	10	Yes	FFF	1	1
A_24_P248251	chr3:148793667-148793710	HLTF	NM_139048	Helicase-like transcription factor	molecular function|ATP binding|IEA|GO:0005524|GOA|na//molecular function|ATPase activity|IEA|GO:0016887|GOA|na//molecular function|DNA binding|IEA|GO:0003677|GOA|na//molecular function|RNA polymerase II transcription factor activity|IEA|GO:0003702|GOA|na/	Hltf	Yes	Yes	15	F	N	F	1	0	1	FNF10	10	Yes	FFF	1	1
A_24_P36745	chrX:40489256-40489315	CXorf38	NM_144970	Chromosome X open reading frame 38		1810030O07Rik	No	No	16	F	N	F	1	0	1	FNF10	10	No
A_24_P145229	chr19:33439215-33439274	CCDC123	NM_032816	Coiled-coil domain containing 123	cellular component|mitochondrion|IEA|GO:0005739|GOA|na	Ccdc123	Yes	No	15	F	N	F	1	0	1	FNF10	10	No
A_23_P112162	chr8:145540235-145540294	DGAT1	NM_012079	Diacylglycerol O-acyltransferase homolog 1 (mouse)	molecular function|2-acylglycerol O-acyltransferase activity|IEA|GO:0003846|GOA|na//molecular function|O-acyltransferase activity|IEA|GO:0008374|GOA|na//molecular function|acyltransferase activity|TAS|GO:0008415|GOA|9756920//molecular function|diacylglyce	Dgat1	Yes	No	15	F	N	F	1	0	1	FNF10	10	No
A_23_P69683	chr4:110460882-110460941	SEC24B	NM_006323	SEC24 family, member B (S. cerevisiae)	molecular function|protein binding|IPI|GO:0005515|GOA|ARRAY(0x287d924)//molecular function|transporter activity|TAS|GO:0005215|GOA|10075675//molecular function|zinc ion binding|IEA|GO:0008270|GOA|na//biological process|ER to Golgi vesicle-mediated transpo	Sec24b	Yes	No	16	F	N	F	1	0	1	FNF10	10	No
A_23_P435521	chr17:41370687-41370746	TMEM106A	NM_145041	Transmembrane protein 106A	molecular function|molecular_function|ND|GO:0003674|GOA|na//biological process|biological_process|ND|GO:0008150|GOA|na//cellular component|cellular_component|ND|GO:0005575|GOA|na//cellular component|integral to membrane|IEA|GO:0016021|GOA|na//cellular com	Tmem106a	Yes	No	14	F	N	F	1	0	1	FNF10	10	No
A_23_P125748	chrX:101138854-101138913	ZMAT1	NM_032441	Zinc finger, matrin type 1	molecular function|DNA binding|IEA|GO:0003677|GOA|na//molecular function|metal ion binding|IEA|GO:0046872|GOA|na//molecular function|zinc ion binding|IEA|GO:0008270|GOA|na//cellular component|intracellular|IEA|GO:0005622|GOA|na//cellular component|nucleol	Zmat1	Yes	Yes	14	F	N	F	1	0	1	FNF10	10	No
A_24_P162373	chr22:29449612-29449671	ZNRF3	NM_032173	Zinc and ring finger 3	molecular function|metal ion binding|IEA|GO:0046872|GOA|na//molecular function|protein binding|IEA|GO:0005515|GOA|na//molecular function|zinc ion binding|IEA|GO:0008270|GOA|na//cellular component|integral to membrane|IEA|GO:0016021|GOA|na//cellular compon	Znrf3	Yes	No	15	F	N	F	1	0	1	FNF10	10	No
A_23_P216307	chr8:92972251-92972310	RUNX1T1	NM_175636	Runt-related transcription factor 1; translocated to, 1 (cyclin D-related)	molecular function|metal ion binding|IEA|GO:0046872|GOA|na//molecular function|protein binding|IPI|GO:0005515|GOA|ARRAY(0xe1a444)//molecular function|protein homodimerization activity|IEA|GO:0042803|GOA|na//molecular function|transcription factor activity	Runx1t1	Yes	Yes	15	F	N	F	1	1	1	FNF11	18	Yes	FFF	1	0
A_24_P341985	chr11:112085547-112085606	BCO2	NM_031938	Beta-carotene oxygenase 2	molecular function|metal ion binding|IEA|GO:0046872|GOA|na//molecular function|oxidoreductase activity|IEA|GO:0016491|GOA|na//molecular function|oxidoreductase activity, acting on single donors with incorporation of molecular oxygen, incorporation of two	Bco2	Yes	No	15	F	N	F	1	1	1	FNF11	18	Yes	FFM	1	1
A_24_P162173	chr10:61843250-61843293	ANK3	NM_020987	Ankyrin 3, node of Ranvier (ankyrin G)	molecular function|protein binding|IPI|GO:0005515|GOA|ARRAY(0x1498064)//biological process|establishment of protein localization|IMP|GO:0045184|GOA|15611082//biological process|signal transduction|IEA|GO:0007165|GOA|na//cellular component|basolateral plas	Ank3	Yes	No	14	F	N	F	1	1	1	FNF11	18	No
A_23_P114075	chr17:65882283-65882342	BPTF	NM_004459	Bromodomain PHD finger transcription factor	molecular function|DNA-dependent ATPase activity|IDA|GO:0008094|GOA|14609955//molecular function|metal ion binding|IEA|GO:0046872|GOA|na//molecular function|protein binding|IPI|GO:0005515|GOA|14609955//molecular function|sequence-specific DNA binding|IDA|	Bptf	Yes	Yes	15	F	N	F	1	1	1	FNF11	18	No
A_24_P176404	chr16:68599637-68599696	ZFP90	NM_133458	Zinc finger protein 90 homolog (mouse)	molecular function|DNA binding|IEA|GO:0003677|GOA|na//molecular function|metal ion binding|IEA|GO:0046872|GOA|na//molecular function|metallopeptidase activity|IEA|GO:0008237|GOA|na//molecular function|zinc ion binding|IEA|GO:0008270|GOA|na//biological pro	Zfp90	Yes	Yes	15	F	N	F	1	1	1	FNF11	18	No
A_32_P221694	chr15:43645279-43645338	ADAL	NM_001159280	Adenosine deaminase-like	molecular function|adenosine deaminase activity|IEA|GO:0004000|GOA|na//molecular function|hydrolase activity|IEA|GO:0016787|GOA|na//biological process|nucleotide metabolic process|IEA|GO:0009117|GOA|na//biological process|purine ribonucleoside monophospha	Adal	Yes	No	15	F	N	F	1	1	1	FNF11	18	No
A_23_P122027	chr5:132052014-132052073	KIF3A	NM_007054	Kinesin family member 3A	molecular function|ATP binding|IEA|GO:0005524|GOA|na//molecular function|microtubule motor activity|IEA|GO:0003777|GOA|na//molecular function|nucleotide binding|IEA|GO:0000166|GOA|na//molecular function|protein binding|IPI|GO:0005515|GOA|17043677//biologi	Kif3a	Yes	No	14	F	N	F	1	1	1	FNF11	18	No
A_23_P254226	chrX:13778433-13778492	OFD1	NM_003611	Oral-facial-digital syndrome 1	molecular function|protein binding|IPI|GO:0005515|GOA|19800048//biological process|biological_process|ND|GO:0008150|GOA|na//biological process|cilium axoneme assembly|IEA|GO:0035083|GOA|na//cellular component|cellular_component|ND|GO:0005575|GOA|na//cellu	Ofd1	Yes	No	15	F	N	F	1	1	1	FNF11	18	No
A_23_P31177	chr7:134850131-134850190	TMEM140	NM_018295	Transmembrane protein 140	cellular component|integral to membrane|IEA|GO:0016021|GOA|na//cellular component|membrane|IEA|GO:0016020|GOA|na	Tmem140	Yes	No	16	F	N	F	1	1	1	FNF11	18	No
A_24_P102203	chr15:43313501-43313560	UBR1	NM_174916	Ubiquitin protein ligase E3 component n-recognin 1	molecular function|ligase activity|IEA|GO:0016874|GOA|na//molecular function|metal ion binding|IEA|GO:0046872|GOA|na//molecular function|protein binding|IEA|GO:0005515|GOA|na//molecular function|ubiquitin-protein ligase activity|IEA|GO:0004842|GOA|na//mol	Ubr1	Yes	No	15	F	N	F	1	1	1	FNF11	18	No
A_24_P100742	chr4:2909528-2909571	ADD1	NM_176801	Adducin 1 (alpha)	molecular function|actin binding|TAS|GO:0003779|GOA|1840603//molecular function|actin filament binding|IDA|GO:0051015|GOA|7642559//molecular function|calmodulin binding|IEA|GO:0005516|GOA|na//molecular function|metal ion binding|IEA|GO:0046872|GOA|na//mol	Add1	Yes	No	14	F	N	F	1	1	1	FNF11	18	No
A_23_P154894	chr21:45194056-45194115	CSTB	NM_000100	Cystatin B (stefin B)	molecular function|cysteine-type endopeptidase inhibitor activity|IDA|GO:0004869|GOA|6203523//molecular function|endopeptidase inhibitor activity|TAS|GO:0004866|GOA|3053245//molecular function|protease binding|IPI|GO:0002020|GOA|6203523//molecular functio	Cstb	Yes	No	15	F	N	F	1	1	1	FNF11	18	No
A_23_P98631	chr11:18301018-18301077	HPS5	NM_181508	Hermansky-Pudlak syndrome 5	molecular function|protein binding|IEA|GO:0005515|GOA|na//biological process|blood coagulation|IEA|GO:0007596|GOA|na//biological process|organelle organization|IEA|GO:0006996|GOA|na//biological process|pigmentation|IEA|GO:0043473|GOA|na//cellular componen	Hps5	Yes	No	16	F	N	F	1	1	1	FNF11	18	No
A_23_P129322	chr15:40703523-40703783	IVD	NM_002225	Isovaleryl Coenzyme A dehydrogenase	molecular function|FAD binding|IEA|GO:0050660|GOA|na//molecular function|isovaleryl-CoA dehydrogenase activity|ISS|GO:0008470|GOA|na//biological process|leucine catabolic process|ISS|GO:0006552|GOA|na//biological process|oxidation reduction|IEA|GO:0055114	Ivd	Yes	No	14	F	N	F	1	1	1	FNF11	18	No
A_24_P324787	chr19:11276642-11276701	KANK2	NM_015493	KN motif and ankyrin repeat domains 2	0	Kank2	Yes	No	16	F	N	F	1	1	1	FNF11	18	No
A_23_P29185	chr22:28377727-28377786	TTC28	NM_001145418	Tetratricopeptide repeat domain 28	molecular function|binding|IEA|GO:0005488|GOA|na	Ttc28	Yes	No	15	F	N	F	1	1	1	FNF11	18	No
A_32_P165330	chr21:38516904-38516945	TTC3	NM_003316	Tetratricopeptide repeat domain 3	molecular function|ligase activity|IEA|GO:0016874|GOA|na//molecular function|metal ion binding|IEA|GO:0046872|GOA|na//molecular function|protein binding|IPI|GO:0005515|GOA|na//molecular function|ubiquitin-protein ligase activity|IDA|GO:0004842|GOA|na//mol	Ttc3	Yes	No	15	F	N	F	1	1	1	FNF11	18	No
A_24_P290585	chr15:70961753-70961804	UACA	NM_018003	Uveal autoantigen with coiled-coil domains and ankyrin repeats	molecular function|molecular_function|ND|GO:0003674|GOA|na//molecular function|protein binding|IEA|GO:0005515|GOA|na//biological process|DNA damage response, signal transduction resulting in induction of apoptosis|IEA|GO:0008630|GOA|na//biological process	Uaca	Yes	No	16	F	N	F	1	1	1	FNF11	18	No
A_23_P391198	chr8:37720515-37720574	RAB11FIP1	NM_025151	RAB11 family interacting protein 1 (class I)	molecular function|protein binding|IPI|GO:0005515|GOA|17353931//biological process|protein transport|IEA|GO:0015031|GOA|na//cellular component|cytoplasmic vesicle|IEA|GO:0031410|GOA|na//cellular component|membrane|IEA|GO:0016020|GOA|na//cellular component	Rab11fip1	Yes	No	14	F	N	F	1	2	1	FNF12	2	No
A_24_P256863	chr1:36759468-36759527	THRAP3	NM_005119	Thyroid hormone receptor associated protein 3	molecular function|ATP binding|IEA|GO:0005524|GOA|na//molecular function|RNA polymerase II transcription mediator activity|IDA|GO:0016455|GOA|10198638//molecular function|ligand-dependent nuclear receptor transcription coactivator activity|NAS|GO:0030374|	Thrap3	Yes	Yes	15	F	N	F	1	2	1	FNF12	2	No
A_24_P353964	chr2:26459795-26459854	HADHA	NM_000182	Hydroxyacyl-Coenzyme A dehydrogenase/3-ketoacyl-Coenzyme A thiolase/enoyl-Coenzyme A hydratase (trifunctional protein), alpha subunit	molecular function|3-hydroxyacyl-CoA dehydrogenase activity|IEA|GO:0003857|GOA|na//molecular function|NAD or NADH binding|IEA|GO:0051287|GOA|na//molecular function|acetyl-CoA C-acetyltransferase activity|TAS|GO:0003985|GOA|8135828//molecular function|acet	Hadha	Yes	No	15	F	N	F	2	0	1	FNF20	4	Yes	FFM	1	1
A_23_P323488	chr9:98718203-98718262	C9orf102	NM_001010895	Chromosome 9 open reading frame 102	molecular function|ATP binding|IEA|GO:0005524|GOA|na//molecular function|ATP-dependent helicase activity|IEA|GO:0008026|GOA|na//molecular function|DNA binding|IEA|GO:0003677|GOA|na//molecular function|helicase activity|IEA|GO:0004386|GOA|na//molecular function|hydrolase activity|IEA|GO:0016787|GOA|na//molecular function|nucleotide binding|IEA|GO:0000166|GOA|na//biological process|DNA repair|IEA|G…	0610007P08Rik	No	Yes	15	F	N	F	2	0	1	FNF20	4	No
A_24_P366082	chr22:18270893-18270952	MICAL3	NM_015241	Microtubule associated monoxygenase, calponin and LIM domain containing 3	molecular function|metal ion binding|IEA|GO:0046872|GOA|na//molecular function|monooxygenase activity|IEA|GO:0004497|GOA|na//molecular function|zinc ion binding|IEA|GO:0008270|GOA|na//biological process|oxidation reduction|IEA|GO:0055114|GOA|na//cellular	Mical3	Yes	No	14	F	N	F	2	0	1	FNF20	4	No
A_23_P3502	chr16:88695164-88695205	ZC3H18	NM_144604	Zinc finger CCCH-type containing 18	molecular function|metal ion binding|IEA|GO:0046872|GOA|na//molecular function|nucleic acid binding|IEA|GO:0003676|GOA|na//molecular function|zinc ion binding|IEA|GO:0008270|GOA|na//cellular component|nucleus|IEA|GO:0005634|GOA|na	Zc3h18	Yes	No	14	F	N	F	2	0	1	FNF20	4	No
A_24_P249784	chr12:1600127-1600186	ERC1	NR_027949	0	0	Erc1	Yes	No	15	F	N	F	2	1	1	FNF21	1	Yes	FFM	1	0
A_23_P419192	chr7:127014436-127014495	ZNF800	NM_176814	Zinc finger protein 800	molecular function|DNA binding|IEA|GO:0003677|GOA|na//molecular function|metal ion binding|IEA|GO:0046872|GOA|na//molecular function|zinc ion binding|IEA|GO:0008270|GOA|na//biological process|regulation of transcription|IEA|GO:0045449|GOA|na//cellular component|intracellular|IEA|GO:0005622|GOA|na//cellular component|nucleus|IEA|GO:0005634|GOA|na	Zfp800	No	Yes	16	F	N	F	2	2	1	FNF22	15	No
A_23_P132910	chr4:40426177-40426236	RBM47	NM_019027	RNA binding motif protein 47	molecular function|RNA binding|IEA|GO:0003723|GOA|na//cellular component|nucleus|IEA|GO:0005634|GOA|na	Rbm47	Yes	No	14	F	N	F	2	2	1	FNF22	15	No
A_24_P273823	chr11:108032355-108032414	NPAT	NM_002519	Nuclear protein, ataxia-telangiectasia locus	molecular function|protein C-terminus binding|IPI|GO:0008022|GOA|15988025//molecular function|protein N-terminus binding|IPI|GO:0047485|GOA|19170105//molecular function|protein binding|IPI|GO:0005515|GOA|18850719//molecular function|transcription activato	Npat	Yes	Yes	16	F	N	F	2	2	1	FNF22	15	No
A_23_P46606	chr1:211923169-211923228	LPGAT1	NM_014873	Lysophosphatidylglycerol acyltransferase 1	molecular function|acyltransferase activity|IEA|GO:0008415|GOA|na//molecular function|molecular_function|ND|GO:0003674|GOA|na//molecular function|transferase activity|IEA|GO:0016740|GOA|na//biological process|biological_process|ND|GO:0008150|GOA|na//biolo	Lpgat1	Yes	No	15	F	N	F	2	2	1	FNF22	15	No
A_23_P38457	chr17:27871269-27871328	TAOK1	NM_020791	TAO kinase 1	molecular function|ATP binding|NAS|GO:0005524|GOA|14517247//molecular function|kinase activity|NAS|GO:0016301|GOA|14517247//molecular function|nucleotide binding|IEA|GO:0000166|GOA|na//molecular function|protein kinase activator activity|IEA|GO:0030295|GO	Taok1	Yes	No	15	F	N	F	2	2	1	FNF22	15	No
A_24_P7887	chr22:41553254-41553313	EP300	NM_001429	E1A binding protein p300	molecular function|DNA binding|IDA|GO:0003677|GOA|9194565//molecular function|acetyltransferase activity|IMP|GO:0016407|GOA|12435739//molecular function|histone acetyltransferase activity|IDA|GO:0004402|GOA|12040021//molecular function|metal ion binding|I	Ep300	Yes	Yes	16	F	N	F	2	2	1	FNF22	15	No
A_24_P840688	chr7:151917785-151919110	MLL3	NM_170606	Myeloid/lymphoid or mixed-lineage leukemia 3	molecular function|DNA binding|IEA|GO:0003677|GOA|na//molecular function|histone-lysine N-methyltransferase activity|IEA|GO:0018024|GOA|na//molecular function|metal ion binding|IEA|GO:0046872|GOA|na//molecular function|methyltransferase activity|IEA|GO:00	Mll3	Yes	Yes	15	F	N	F	2	2	1	FNF22	15	No
A_23_P66988	chr18:55143958-55144017	ONECUT2	NM_004852	One cut homeobox 2	molecular function|RNA polymerase II transcription factor activity|TAS|GO:0003702|GOA|9915796//molecular function|sequence-specific DNA binding|IEA|GO:0043565|GOA|na//molecular function|transcription factor activity|IEA|GO:0003700|GOA|na//biological proce	Onecut2	Yes	Yes	15	F	N	F	2	2	1	FNF22	15	No
A_23_P343799	chr11:15993624-15993683	SOX6	NM_033326	SRY (sex determining region Y)-box 6	molecular function|DNA binding|NAS|GO:0003677|GOA|1614875//molecular function|protein binding|IEA|GO:0005515|GOA|na//molecular function|protein heterodimerization activity|IEA|GO:0046982|GOA|na//molecular function|sequence-specific DNA binding|IEA|GO:0043	Sox6	Yes	Yes	15	F	N	F	2	2	1	FNF22	15	No
A_24_P264192	chr1:24975357-24975416	SRRM1	NM_005839	Serine/arginine repetitive matrix 1	molecular function|DNA binding|IEA|GO:0003677|GOA|na//molecular function|RNA binding|IEA|GO:0003723|GOA|na//molecular function|protein binding|IPI|GO:0005515|GOA|17353931//biological process|RNA splicing|EXP|GO:0008380|GOA|12226669//biological process|RNA	Srrm1	Yes	Yes	14	F	N	F	2	2	1	FNF22	15	No
A_24_P221323	chr3:141162790-141162849	ZBTB38	NM_001080412	Zinc finger and BTB domain containing 38	molecular function|metal ion binding|IEA|GO:0046872|GOA|na//molecular function|protein binding|IEA|GO:0005515|GOA|na//molecular function|transcription factor activity|ISS|GO:0003700|GOA|na//molecular function|zinc ion binding|IEA|GO:0008270|GOA|na//biolog	Zbtb38	Yes	Yes	16	F	N	F	2	2	1	FNF22	15	No
A_32_P37584	chr7:86824037-86824096	DMTF1	NR_024550	0	0	Dmtf1	Yes	No	14	F	N	F	2	2	1	FNF22	15	No
A_23_P148121	chr11:65357976-65358035	EHBP1L1	NM_001099409	EH domain binding protein 1-like 1	0	Ehbp1l1	Yes	No	14	F	N	F	2	2	1	FNF22	15	No
A_23_P114275	chrX:118377199-118377258	PGRMC1	NM_006667	Progesterone receptor membrane component 1	molecular function|heme binding|IEA|GO:0020037|GOA|na//molecular function|protein binding|IPI|GO:0005515|GOA|17353931//molecular function|receptor activity|IEA|GO:0004872|GOA|na//molecular function|steroid binding|IEA|GO:0005496|GOA|na//cellular component	Pgrmc1	Yes	No	16	F	N	F	2	2	1	FNF22	15	No
A_23_P368393	chr2:198285739-198285791	SF3B1	NM_012433	Splicing factor 3b, subunit 1, 155kDa	molecular function|chromatin binding|IEA|GO:0003682|GOA|na//molecular function|protein binding|IPI|GO:0005515|GOA|17353931//biological process|RNA splicing|EXP|GO:0008380|GOA|12226669//biological process|RNA splicing, via transesterification reactions|NAS	Sf3b1	Yes	No	14	F	N	F	2	2	1	FNF22	15	No
A_23_P26124	chr15:60789657-60789716	RORA	NM_134262	RAR-related orphan receptor A	molecular function|ligand-dependent nuclear receptor activity|TAS|GO:0004879|GOA|7926749//molecular function|metal ion binding|IEA|GO:0046872|GOA|na//molecular function|protein binding|IPI|GO:0005515|GOA|16713569//molecular function|sequence-specific DNA	Rora	Yes	No	15	F	M	M	0	0	0	FMM00	7	Yes	FMM	0	1
A_24_P913819	chr1:57233558-57233613	C1orf168	NM_001004303	Chromosome 1 open reading frame 168		1700024P16Rik	No	No	15	F	M	M	0	0	0	FMM00	7	No
A_23_P69171	chr3:151599410-151599469	SUCNR1	NM_033050	Succinate receptor 1	molecular function|G-protein coupled receptor activity|IEA|GO:0004930|GOA|na//molecular function|purinergic nucleotide receptor activity, G-protein coupled|IEA|GO:0045028|GOA|na//molecular function|receptor activity|IEA|GO:0004872|GOA|na//biological proce	Sucnr1	Yes	No	16	F	M	M	0	0	0	FMM00	7	No
A_24_P916808	chr15:91142660-91142719	CRTC3	BC019060	CREB regulated transcription coactivator 3	biological process|interspecies interaction between organisms|IEA|GO:0044419|GOA|na//biological process|regulation of transcription|IEA|GO:0045449|GOA|na//cellular component|cytoplasm|IEA|GO:0005737|GOA|na//cellular component|nucleus|IEA|GO:0005634|GOA|na	Crtc3	Yes	Yes	15	F	M	M	0	0	0	FMM00	7	No
A_23_P14612	chr15:49777580-49777639	FGF7	NM_002009	Fibroblast growth factor 7 (keratinocyte growth factor)	molecular function|chemoattractant activity|IDA|GO:0042056|GOA|17449030//molecular function|growth factor activity|IEA|GO:0008083|GOA|na//molecular function|heparin binding|IEA|GO:0008201|GOA|na//molecular function|type 2 fibroblast growth factor receptor	Fgf7	Yes	No	15	F	M	M	0	0	0	FMM00	7	No
A_24_P93353	chr5:94861002-94861155	TTC37	NM_014639	Tetratricopeptide repeat domain 37	molecular function|binding|IEA|GO:0005488|GOA|na	Ttc37	Yes	No	15	F	M	M	0	0	0	FMM00	7	No
A_23_P371824	chr1:151555864-151555923	TUFT1	NM_020127	Tuftelin 1	molecular function|protein binding|IEA|GO:0005515|GOA|na//molecular function|structural constituent of tooth enamel|NAS|GO:0030345|GOA|12489194//biological process|bone mineralization|NAS|GO:0030282|GOA|12489194//biological process|odontogenesis|NAS|GO:00	Tuft1	Yes	No	14	F	M	M	0	0	0	FMM00	7	No
A_23_P253301	chr3:149683335-149683394	PFN2	NM_053024	Profilin 2	molecular function|actin binding|NAS|GO:0003779|GOA|na//molecular function|phosphatidylinositol-4,5-bisphosphate binding|NAS|GO:0005546|GOA|na//molecular function|protein binding|IPI|GO:0005515|GOA|ARRAY(0x12fa2ec)//biological process|actin cytoskeleton o	Pfn2	Yes	No	14	F	M	M	0	1	1	FMM01	11	Yes	FMF	1	0
A_23_P152428	chr16:71668676-71668735	MARVELD3	NM_052858	MARVEL domain containing 3	cellular component|integral to membrane|IEA|GO:0016021|GOA|na//cellular component|membrane|IEA|GO:0016020|GOA|na	Marveld3	Yes	No	15	F	M	M	0	1	1	FMM01	11	No
A_24_P256764	chr17:8455382-8455441	MYH10	NM_005964	Myosin, heavy chain 10, non-muscle	molecular function|ADP binding|IDA|GO:0043531|GOA|15845534//molecular function|ATP binding|IDA|GO:0005524|GOA|15845534//molecular function|ATP binding|NAS|GO:0005524|GOA|7782316//molecular function|actin binding|NAS|GO:0003779|GOA|7782316//molecular funct	Myh10	Yes	No	16	F	M	M	0	1	1	FMM01	11	No
A_24_P201089	chr8:23423769-23423828	SLC25A37	NM_016612	Solute carrier family 25, member 37	molecular function|binding|IEA|GO:0005488|GOA|na//molecular function|iron ion transmembrane transporter activity|IEA|GO:0005381|GOA|na//biological process|ion transport|IEA|GO:0006811|GOA|na//biological process|mitochondrial iron ion transport|IEA|GO:0048	Slc25a37	Yes	No	14	F	M	M	0	1	1	FMM01	11	No
A_23_P201066	chr1:223441879-223441938	SUSD4	NM_017982	Sushi domain containing 4	cellular component|integral to membrane|IEA|GO:0016021|GOA|na//cellular component|membrane|IEA|GO:0016020|GOA|na	Susd4	Yes	No	14	F	M	M	0	1	1	FMM01	11	No
A_24_P289265	chr9:107618189-107618248	ABCA1	AK024328	ATP-binding cassette, sub-family A (ABC1), member 1	molecular function|ATP binding|IDA|GO:0005524|GOA|11700048//molecular function|ATPase activity|IEA|GO:0016887|GOA|na//molecular function|anion transmembrane transporter activity|ISS|GO:0008509|GOA|na//molecular function|apolipoprotein A-I binding|IPI|GO:0	Abca1	Yes	No	14	F	M	M	0	1	1	FMM01	11	No
A_23_P166663	chr3:57306405-57306464	APPL1	NM_012096	Adaptor protein, phosphotyrosine interaction, PH domain and leucine zipper containing 1	molecular function|protein binding|IPI|GO:0005515|GOA|ARRAY(0x2f55fbc)//molecular function|protein kinase B binding|IPI|GO:0043422|GOA|17848569//biological process|cell cycle|IEA|GO:0007049|GOA|na//biological process|cell proliferation|IDA|GO:0008283|GOA|	Appl1	Yes	No	16	F	M	M	0	1	1	FMM01	11	No
A_23_P156087	chr5:42719622-42719681	GHR	NM_000163	Growth hormone receptor	molecular function|SH2 domain binding|IEA|GO:0042169|GOA|na//molecular function|growth hormone receptor activity|IEA|GO:0004903|GOA|na//molecular function|peptide hormone binding|IPI|GO:0017046|GOA|ARRAY(0xb5c954)//molecular function|phosphate binding|IEA	Ghr	Yes	No	16	F	M	M	0	1	1	FMM01	11	No
A_24_P329229	chr7:66105338-66105397	KCTD7	NM_153033	Potassium channel tetramerisation domain containing 7	molecular function|protein binding|IEA|GO:0005515|GOA|na//molecular function|voltage-gated potassium channel activity|IEA|GO:0005249|GOA|na//biological process|potassium ion transport|IEA|GO:0006813|GOA|na//cellular component|membrane|IEA|GO:0016020|GOA|n	Kctd7	Yes	No	15	F	M	M	0	1	1	FMM01	11	No
A_24_P16997	chr14:50949084-50949135	MAP4K5	NM_198794	Mitogen-activated protein kinase kinase kinase kinase 5	molecular function|ATP binding|IDA|GO:0005524|GOA|9038372//molecular function|nucleotide binding|IEA|GO:0000166|GOA|na//molecular function|protein binding|IPI|GO:0005515|GOA|ARRAY(0x2f3b118)//molecular function|protein kinase activity|TAS|GO:0004672|GOA|9	Map4k5	Yes	No	15	F	M	M	0	1	1	FMM01	11	No
A_23_P108200	chr19:18308370-18308429	RAB3A	NM_002866	RAB3A, member RAS oncogene family	molecular function|GTP binding|IEA|GO:0005525|GOA|na//molecular function|GTPase activity|IMP|GO:0003924|GOA|10859313//molecular function|nucleotide binding|IEA|GO:0000166|GOA|na//molecular function|protein binding|IPI|GO:0005515|GOA|10859313//molecular fu	Rab3a	Yes	No	14	F	M	M	0	1	1	FMM01	11	No
A_24_P382637	chr20:60777179-60777238	GTPBP5	NM_015666	GTP binding protein 5 (putative)	molecular function|GTP binding|IEA|GO:0005525|GOA|na//molecular function|nucleotide binding|IEA|GO:0000166|GOA|na//biological process|ribosome biogenesis|IEA|GO:0042254|GOA|na//cellular component|intracellular|IEA|GO:0005622|GOA|na//cellular component|mit	Gtpbp5	Yes	No	14	F	M	M	0	2	1	FMM02	1	No
A_23_P71319	chr8:11696201-11696260	FDFT1	NM_004462	Farnesyl-diphosphate farnesyltransferase 1	molecular function|farnesyl-diphosphate farnesyltransferase activity|EXP|GO:0004310|GOA|10896663//molecular function|oxidoreductase activity|IEA|GO:0016491|GOA|na//molecular function|protein binding|IPI|GO:0005515|GOA|17353931//molecular function|transfer	Fdft1	Yes	No	14	F	M	M	1	0	1	FMM10	1	No
A_23_P44724	chr12:77252554-77252613	CSRP2	NM_001321	Cysteine and glycine-rich protein 2	molecular function|metal ion binding|IEA|GO:0046872|GOA|na//molecular function|molecular_function|ND|GO:0003674|GOA|na//molecular function|zinc ion binding|IEA|GO:0008270|GOA|na//biological process|cell differentiation|NAS|GO:0030154|GOA|na//biological pr	Csrp2	Yes	No	16	F	M	M	1	1	1	FMM11	3	Yes	FMF	1	1
A_23_P94338	chr8:120581508-120581567	ENPP2	NM_006209	Ectonucleotide pyrophosphatase/phosphodiesterase 2	molecular function|alkylglycerophosphoethanolamine phosphodiesterase activity|IEA|GO:0047391|GOA|na//molecular function|hydrolase activity|TAS|GO:0016787|GOA|7982964//molecular function|metal ion binding|IEA|GO:0046872|GOA|na//molecular function|nucleic a	Enpp2	Yes	No	16	F	M	M	1	1	1	FMM11	3	Yes	FMM	1	1
A_23_P145824	chr7:94920086-94920145	PPP1R9A	NM_017650	Protein phosphatase 1, regulatory (inhibitor) subunit 9A	molecular function|actin binding|IEA|GO:0003779|GOA|na//molecular function|protein binding|IEA|GO:0005515|GOA|na//biological process|cell differentiation|IEA|GO:0030154|GOA|na//biological process|multicellular organismal development|IEA|GO:0007275|GOA|na/	Ppp1r9a	Yes	No	16	F	M	M	1	1	1	FMM11	3	No
A_23_P112289	chr9:100362821-100362880	TMOD1	NM_003275	Tropomodulin 1	molecular function|actin binding|IEA|GO:0003779|GOA|na//molecular function|tropomyosin binding|IEA|GO:0005523|GOA|na//biological process|myofibril assembly|IEA|GO:0030239|GOA|na//cellular component|cortical cytoskeleton|IEA|GO:0030863|GOA|na//cellular com	Tmod1	Yes	No	16	F	M	M	2	0	1	FMM20	7	Yes	FMF	1	1
A_23_P206113	chr15:75043624-75044138	CYP1A2	NM_000761	Cytochrome P450, family 1, subfamily A, polypeptide 2	molecular function|aromatase activity|IEA|GO:0070330|GOA|na//molecular function|caffeine oxidase activity|IDA|GO:0034875|GOA|18619574//molecular function|demethylase activity|IDA|GO:0032451|GOA|2813353//molecular function|electron carrier activity|TAS|GO:	Cyp1a2	Yes	No	14	F	M	M	2	0	1	FMM20	7	Yes	FMF	1	1
A_23_P118185	chr16:48385610-48385669	LONP2	NM_031490	Lon peptidase 2, peroxisomal	molecular function|ATP binding|IEA|GO:0005524|GOA|na//molecular function|ATP-dependent peptidase activity|IEA|GO:0004176|GOA|na//molecular function|enzyme binding|IPI|GO:0019899|GOA|18281296//molecular function|nucleoside-triphosphatase activity|IEA|GO:00	Lonp2	Yes	No	14	F	M	M	2	0	1	FMM20	7	Yes	FMM	1	0
A_24_P293530	chr1:47516002-47516061	CYP4X1	NM_178033	Cytochrome P450, family 4, subfamily X, polypeptide 1	molecular function|aromatase activity|IEA|GO:0070330|GOA|na//molecular function|electron carrier activity|IEA|GO:0009055|GOA|na//molecular function|heme binding|IEA|GO:0020037|GOA|na//molecular function|metal ion binding|IEA|GO:0046872|GOA|na//molecular f	Cyp4x1	Yes	No	15	F	M	M	2	0	1	FMM20	7	No
A_32_P83203	chr2:206041210-206041269	PARD3B	NM_205863	Par-3 partitioning defective 3 homolog B (C. elegans)	molecular function|protein binding|IEA|GO:0005515|GOA|na//biological process|cell cycle|IEA|GO:0007049|GOA|na//biological process|cell division|IEA|GO:0051301|GOA|na//cellular component|cell junction|IEA|GO:0030054|GOA|na//cellular component|endomembrane	Pard3b	Yes	No	15	F	M	M	2	0	1	FMM20	7	No
A_23_P88411	chr14:81942931-81942990	SEL1L	NM_005065	Sel-1 suppressor of lin-12-like (C. elegans)	molecular function|protein binding|IPI|GO:0005515|GOA|ARRAY(0x42cd5c4)//biological process|Notch signaling pathway|IEA|GO:0007219|GOA|na//cellular component|endoplasmic reticulum|IEA|GO:0005783|GOA|na//cellular component|endoplasmic reticulum membrane|IEA	Sel1l	Yes	No	14	F	M	M	2	0	1	FMM20	7	No
A_23_P147729	chr12:69158570-69158629	SLC35E3	NM_018656	Solute carrier family 35, member E3	cellular component|integral to membrane|IEA|GO:0016021|GOA|na//cellular component|membrane|IEA|GO:0016020|GOA|na	Slc35e3	Yes	No	15	F	M	M	2	0	1	FMM20	7	No
A_23_P89780	chr18:21534735-21534794	LAMA3	NM_198129	Laminin, alpha 3	molecular function|receptor binding|IEA|GO:0005102|GOA|na//molecular function|structural molecule activity|NAS|GO:0005198|GOA|8586427//biological process|epidermis development|TAS|GO:0008544|GOA|8586427//biological process|hemidesmosome assembly|EXP|GO:00	Lama3	Yes	No	15	F	M	M	2	1	1	FMM21	2	Yes	FMM	1	1
A_24_P366967	chr1:93965049-93965108	FNBP1L	NM_017737	Formin binding protein 1-like	molecular function|lipid binding|IEA|GO:0008289|GOA|na//biological process|endocytosis|IEA|GO:0006897|GOA|na//cellular component|cell cortex|IEA|GO:0005938|GOA|na//cellular component|cytoplasm|IEA|GO:0005737|GOA|na//cellular component|cytoplasmic membrane	Fnbp1l	Yes	No	16	F	M	M	2	1	1	FMM21	2	No
A_23_P2041	chr11:12380556-12380615	MICALCL	NM_032867	MICAL C-terminal like	molecular function|mitogen-activated protein kinase binding|ISS|GO:0051019|GOA|na//biological process|biological_process|ND|GO:0008150|GOA|na//biological process|cell differentiation|IEA|GO:0030154|GOA|na//biological process|multicellular organismal devel	Micalcl	Yes	No	14	F	M	M	2	2	1	FMM22	9	Yes	FMF	1	1
A_23_P65357	chr14:70839223-70839282	SYNJ2BP	NM_018373	Synaptojanin 2 binding protein	molecular function|protein binding|IEA|GO:0005515|GOA|na//cellular component|integral to membrane|IEA|GO:0016021|GOA|na//cellular component|membrane|IEA|GO:0016020|GOA|na//cellular component|mitochondrial outer membrane|IEA|GO:0005741|GOA|na//cellular com	Synj2bp	Yes	No	14	F	M	M	2	2	1	FMM22	9	Yes	FMM	1	0
A_24_P7211	chr5:154182848-154182895	LARP1	NM_015315	La ribonucleoprotein domain family, member 1	molecular function|RNA binding|IEA|GO:0003723|GOA|na//molecular function|protein binding|IPI|GO:0005515|GOA|17353931	Larp1	Yes	No	14	F	M	M	2	2	1	FMM22	9	No
A_24_P45728	chr1:151509723-151509782	CGN	NM_020770	Cingulin	molecular function|actin binding|ISS|GO:0003779|GOA|na//molecular function|motor activity|IEA|GO:0003774|GOA|na//molecular function|protein binding|IPI|GO:0005515|GOA|ARRAY(0x2e77394)//biological process|biological_process|ND|GO:0008150|GOA|na//cellular c	Cgn	Yes	No	15	F	M	M	2	2	1	FMM22	9	No
A_24_P271985	chr2:233709092-233709151	GIGYF2	NM_015575	GRB10 interacting GYF protein 2	molecular function|protein binding|IPI|GO:0005515|GOA|16120600	Gigyf2	Yes	No	15	F	M	M	2	2	1	FMM22	9	No
A_23_P169479	chr9:80038193-80038252	GNA14	NM_004297	Guanine nucleotide binding protein (G protein), alpha 14	molecular function|GTP binding|IEA|GO:0005525|GOA|na//molecular function|GTPase activity|TAS|GO:0003924|GOA|10191087//molecular function|guanyl nucleotide binding|IEA|GO:0019001|GOA|na//molecular function|nucleotide binding|IEA|GO:0000166|GOA|na//molecula	Gna14	Yes	No	15	F	M	M	2	2	1	FMM22	9	No
A_24_P171601	chr3:42679283-42679342	NKTR	NM_005385	Natural killer-tumor recognition sequence	molecular function|cyclosporin A binding|TAS|GO:0016018|GOA|8421688//molecular function|isomerase activity|IEA|GO:0016853|GOA|na//molecular function|peptidyl-prolyl cis-trans isomerase activity|IEA|GO:0003755|GOA|na//biological process|protein folding|IEA	Nktr	Yes	No	14	F	M	M	2	2	1	FMM22	9	No
A_24_P58453	chr9:95078048-95078107	NOL8	NR_024020	0	0	Nol8	Yes	No	16	F	M	M	2	2	1	FMM22	9	No
A_24_P25354	chr8:38684831-38684890	TACC1	NM_006283	Transforming, acidic coiled-coil containing protein 1	molecular function|protein binding|IPI|GO:0005515|GOA|ARRAY(0x2f3d6d8)//biological process|cell cycle|IEA|GO:0007049|GOA|na//biological process|cell division|IEA|GO:0051301|GOA|na//cellular component|cytoplasm|IEA|GO:0005737|GOA|na//cellular component|cyt	Tacc1	Yes	No	14	F	M	M	2	2	1	FMM22	9	No
A_23_P115919	chr10:13320283-13320342	PHYH	NM_006214	Phytanoyl-CoA 2-hydroxylase	molecular function|L-ascorbic acid binding|IEA|GO:0031418|GOA|na//molecular function|catalytic activity|TAS|GO:0003824|GOA|9326939//molecular function|electron carrier activity|TAS|GO:0009055|GOA|8954107//molecular function|metal ion binding|IEA|GO:004687	Phyh	Yes	No	16	F	M	N	0	0	0	FMN00	11	Yes	FMM	0	1
A_23_P406122	chr20:3232168-3232227	C20orf194	NM_001009984	Chromosome 20 open reading frame 194		4930402H24Rik	No	No	14	F	M	N	0	0	0	FMN00	11	No
A_32_P172803	chr4:156266639-156266698	MAP9	NM_001039580	Microtubule-associated protein 9	biological process|cell cycle|IEA|GO:0007049|GOA|na//biological process|cell division|IEA|GO:0051301|GOA|na//biological process|mitosis|IEA|GO:0007067|GOA|na//cellular component|cytoplasm|IEA|GO:0005737|GOA|na//cellular component|cytoskeleton|IEA|GO:0005856|GOA|na//cellular component|microtubule|IEA|GO:0005874|GOA|na//cellular component|spindle|IEA|GO:0005819|GOA|na	Mtap9	No	No	15	F	M	N	0	0	0	FMN00	11	No
A_23_P394545	chr12:105540848-105540907	KIAA1033	NM_015275	KIAA1033	biological process|endosome transport|ISS|GO:0016197|GOA|na//cellular component|WASH complex|IDA|GO:0071203|GOA|19922875	A230046K03Rik	No	No	14	F	M	N	0	0	0	FMN00	11	No
A_24_P230176	chr17:79640236-79640295	CCDC137	NM_199287	Coiled-coil domain containing 137	0	Ccdc137	Yes	No	15	F	M	N	0	0	0	FMN00	11	No
A_23_P391980	chr16:66657318-66657377	CMTM4	NM_181521	CKLF-like MARVEL transmembrane domain containing 4	molecular function|cytokine activity|IEA|GO:0005125|GOA|na//biological process|chemotaxis|IEA|GO:0006935|GOA|na//cellular component|extracellular space|IEA|GO:0005615|GOA|na//cellular component|integral to membrane|IEA|GO:0016021|GOA|na//cellular componen	Cmtm4	Yes	No	14	F	M	N	0	0	0	FMN00	11	No
A_24_P158946	chr12:32786493-32786552	FGD4	NM_139241	FYVE, RhoGEF and PH domain containing 4	molecular function|Rho guanyl-nucleotide exchange factor activity|IEA|GO:0005089|GOA|na//molecular function|actin filament binding|IEA|GO:0051015|GOA|na//molecular function|guanyl-nucleotide exchange factor activity|EXP|GO:0005085|GOA|11756498//molecular	Fgd4	Yes	No	15	F	M	N	0	0	0	FMN00	11	No
A_23_P114814	chr1:228879425-228879484	RHOU	NM_021205	Ras homolog gene family, member U	molecular function|GTP binding|IEA|GO:0005525|GOA|na//molecular function|GTPase activity|IEA|GO:0003924|GOA|na//molecular function|metal ion binding|IEA|GO:0046872|GOA|na//molecular function|nucleotide binding|IEA|GO:0000166|GOA|na//molecular function|pro	Rhou	Yes	No	15	F	M	N	0	0	0	FMN00	11	No
A_32_P89691	chr15:45366167-45366225	SORD	NM_003104	Sorbitol dehydrogenase	molecular function|L-iditol 2-dehydrogenase activity|IDA|GO:0003939|GOA|ARRAY(0x19a5db8)//molecular function|L-iditol 2-dehydrogenase activity|ISS|GO:0003939|GOA|na//molecular function|NAD or NADH binding|IDA|GO:0051287|GOA|12962626//molecular function|bi	Sord	Yes	No	16	F	M	N	0	0	0	FMN00	11	No
A_32_P361915	chr15:78301342-78301401	TBC1D2B	NM_144572	TBC1 domain family, member 2B	molecular function|GTPase activator activity|IEA|GO:0005096|GOA|na//molecular function|Rab GTPase activator activity|IEA|GO:0005097|GOA|na//biological process|regulation of Rab GTPase activity|IEA|GO:0032313|GOA|na//cellular component|intracellular|IEA|GO	Tbc1d2b	Yes	No	15	F	M	N	0	0	0	FMN00	11	No
A_23_P371495	chr12:29655379-29655438	TMTC1	NM_175861	Transmembrane and tetratricopeptide repeat containing 1	molecular function|binding|IEA|GO:0005488|GOA|na//cellular component|integral to membrane|IEA|GO:0016021|GOA|na//cellular component|membrane|IEA|GO:0016020|GOA|na	Tmtc1	Yes	No	14	F	M	N	0	0	0	FMN00	11	No
A_24_P165949	chr3:190027965-190028024	CLDN1	NM_021101	Claudin 1	molecular function|PDZ domain binding|IEA|GO:0030165|GOA|na//molecular function|identical protein binding|ISS|GO:0042802|GOA|na//molecular function|structural molecule activity|IEA|GO:0005198|GOA|na//biological process|calcium-independent cell-cell adhesi	Cldn1	Yes	No	15	F	M	N	0	1	1	FMN01	3	Yes	FMF	1	0
A_23_P147801	chr3:88190798-88190857	ZNF654	NM_018293	Zinc finger protein 654	molecular function|DNA binding|IEA|GO:0003677|GOA|na//molecular function|metal ion binding|IEA|GO:0046872|GOA|na//molecular function|zinc ion binding|IEA|GO:0008270|GOA|na//biological process|regulation of transcription|IEA|GO:0045449|GOA|na//cellular component|intracellular|IEA|GO:0005622|GOA|na//cellular component|nucleus|IEA|GO:0005634|GOA|na	Zfp654	No	Yes	15	F	M	N	0	1	1	FMN01	3	No
A_23_P421379	chr11:2154402-2154754	IGF2	NR_003512	insulin-like growth factor 2 (somatomedin A)	molecular function|growth factor activity|IDA|GO:0008083|GOA|11500939//molecular function|hormone activity|IEA|GO:0005179|GOA|na//molecular function|insulin receptor binding|IPI|GO:0005158|GOA|12138094//molecular function|insulin-like growth factor recep	Igf2	Yes	No	14	F	M	N	0	1	1	FMN01	3	No
A_23_P117515	chr14:58838770-58838829	ARID4A	NM_023001	AT rich interactive domain 4A (RBP1-like)	molecular function|DNA binding|IDA|GO:0003677|GOA|15640446//molecular function|chromatin binding|IEA|GO:0003682|GOA|na//molecular function|protein binding|IPI|GO:0005515|GOA|12724404//molecular function|protein binding|TAS|GO:0005515|GOA|1857421//molecula	Arid4a	Yes	Yes	15	F	M	N	0	2	1	FMN02	5	Yes	FMF	1	1
A_24_P923353	chr6:24535617-24535676	ALDH5A1	NM_170740	Aldehyde dehydrogenase 5 family, member A1	molecular function|oxidoreductase activity|IEA|GO:0016491|GOA|na//molecular function|protein homodimerization activity|IC|GO:0042803|GOA|16199352//molecular function|succinate-semialdehyde dehydrogenase activity|IDA|GO:0004777|GOA|9683595//molecular funct	Aldh5a1	Yes	No	14	F	M	N	0	2	1	FMN02	5	Yes	FMM	1	1
A_23_P380839	chr11:76256997-76257056	C11orf30	NM_020193	Chromosome 11 open reading frame 30	biological process|DNA repair|IEA|GO:0006281|GOA|na//biological process|chromatin modification|IEA|GO:0016568|GOA|na//biological process|regulation of transcription|IEA|GO:0045449|GOA|na//cellular component|nucleus|IEA|GO:0005634|GOA|na	2210018M11Rik	No	Yes	14	F	M	N	0	2	1	FMN02	5	No
A_23_P41755	chr5:139494528-139494587	PURA	NM_005859	Purine-rich element binding protein A	molecular function|RNA polymerase II transcription factor activity, enhancer binding|TAS|GO:0003705|GOA|9334258//molecular function|SMAD binding|IEA|GO:0046332|GOA|na//molecular function|double-stranded telomeric DNA binding|IDA|GO:0003691|GOA|15777841//m	Pura	Yes	Yes	14	F	M	N	0	2	1	FMN02	5	No
A_24_P340428	chr3:182553899-182554157	ATP11B	NM_014616	ATPase, class VI, type 11B	molecular function|ATP binding|IEA|GO:0005524|GOA|na//molecular function|ATPase activity, coupled to transmembrane movement of ions, phosphorylative mechanism|IEA|GO:0015662|GOA|na//molecular function|binding|NAS|GO:0005488|GOA|11790799//molecular functio	Atp11b	Yes	No	14	F	M	N	0	2	1	FMN02	5	No
A_24_P67096	chr17:67309288-67309347	ABCA5	NM_172232	ATP-binding cassette, sub-family A (ABC1), member 5	molecular function|ATP binding|IEA|GO:0005524|GOA|na//molecular function|ATPase activity|IEA|GO:0016887|GOA|na//molecular function|nucleotide binding|IEA|GO:0000166|GOA|na//biological process|transport|IEA|GO:0006810|GOA|na//cellular component|Golgi appar	Abca5	Yes	No	14	F	M	N	1	0	1	FMN10	2	No
A_23_P91964	chr3:141328313-141328725	RASA2	NM_006506	RAS p21 protein activator 2	molecular function|Ras GTPase activator activity|TAS|GO:0005099|GOA|8812506//molecular function|metal ion binding|IEA|GO:0046872|GOA|na//biological process|intracellular signaling cascade|IEA|GO:0007242|GOA|na//biological process|regulation of small GTPas	Rasa2	Yes	No	14	F	M	N	1	0	1	FMN10	2	No
A_23_P78108	chr17:26900423-26900482	ALDOC	NM_005165	Aldolase C, fructose-bisphosphate	molecular function|cytoskeletal protein binding|IDA|GO:0008092|GOA|9244396//molecular function|fructose-bisphosphate aldolase activity|IDA|GO:0004332|GOA|ARRAY(0x1534ed8)//molecular function|lyase activity|IEA|GO:0016829|GOA|na//molecular function|protein	Aldoc	Yes	No	14	F	M	N	1	1	1	FMN11	6	Yes	FMF	1	1
A_24_P179479	chr2:37495239-37495298	PRKD3	BC030706	Protein kinase D3	molecular function|ATP binding|IEA|GO:0005524|GOA|na//molecular function|metal ion binding|IEA|GO:0046872|GOA|na//molecular function|nucleotide binding|IEA|GO:0000166|GOA|na//molecular function|protein binding|IPI|GO:0005515|GOA|17196367//molecular functi	Prkd3	Yes	No	15	F	M	N	1	1	1	FMN11	6	Yes	FMM	1	1
A_23_P97795	chr10:27493392-27493451	ACBD5	NR_024150	0	0	Acbd5	Yes	No	15	F	M	N	1	1	1	FMN11	6	No
A_24_P295245	chr8:62596599-62596658	ASPH	NM_032468	Aspartate beta-hydroxylase	molecular function|binding|IEA|GO:0005488|GOA|na//molecular function|calcium ion binding|TAS|GO:0005509|GOA|11007777//molecular function|electron carrier activity|TAS|GO:0009055|GOA|7821814//molecular function|oxidoreductase activity|IEA|GO:0016491|GOA|na	Asph	Yes	No	14	F	M	N	1	1	1	FMN11	6	No
A_23_P34942	chr1:93131511-93131549	EVI5	NM_005665	Ecotropic viral integration site 5	molecular function|Rab GTPase activator activity|IEA|GO:0005097|GOA|na//molecular function|protein binding|IPI|GO:0005515|GOA|16439210//biological process|cell cycle|IEA|GO:0007049|GOA|na//biological process|cell division|IEA|GO:0051301|GOA|na//biological	Evi5	Yes	No	16	F	M	N	1	1	1	FMN11	6	No
A_23_P103897	chr1:85009909-85009968	SPATA1	NM_001081472	Spermatogenesis associated 1	0	Spata1	Yes	No	14	F	M	N	1	1	1	FMN11	6	No
A_23_P40936	chr3:15084530-15084589	NR2C2	NM_003298	Nuclear receptor subfamily 2, group C, member 2	molecular function|metal ion binding|IEA|GO:0046872|GOA|na//molecular function|receptor activity|TAS|GO:0004872|GOA|9006963//molecular function|sequence-specific DNA binding|IEA|GO:0043565|GOA|na//molecular function|steroid hormone receptor activity|IEA|G	Nr2c2	Yes	Yes	14	F	M	N	1	2	1	FMN12	1	No
A_23_P90510	chr19:1497806-1497865	REEP6	NM_138393	Receptor accessory protein 6	cellular component|integral to membrane|IEA|GO:0016021|GOA|na//cellular component|membrane|IEA|GO:0016020|GOA|na	Reep6	Yes	No	14	F	M	N	2	0	1	FMN20	16	Yes	FMF	1	0
A_23_P71598	chr9:13106799-13106858	MPDZ	NM_003829	Multiple PDZ domain protein	molecular function|protein C-terminus binding|IPI|GO:0008022|GOA|11802782//molecular function|protein binding|IPI|GO:0005515|GOA|16192269//biological process|interspecies interaction between organisms|IEA|GO:0044419|GOA|na//cellular component|apical plasm	Mpdz	Yes	No	14	F	M	N	2	0	1	FMN20	16	Yes	FMF	1	1
A_23_P104237	chr10:113913394-113913425	GPAM	NM_020918	Glycerol-3-phosphate acyltransferase, mitochondrial	molecular function|acyltransferase activity|IEA|GO:0008415|GOA|na//molecular function|glycerol-3-phosphate O-acyltransferase activity|EXP|GO:0004366|GOA|11546763//molecular function|glycerol-3-phosphate O-acyltransferase activity|IMP|GO:0004366|GOA|182387	Gpam	Yes	No	14	F	M	N	2	0	1	FMN20	16	Yes	FMF	1	1
A_24_P331560	chrX:7271727-7271786	STS	NM_000351	Steroid sulfatase (microsomal), isozyme S	molecular function|hydrolase activity|IEA|GO:0016787|GOA|na//molecular function|metal ion binding|IEA|GO:0046872|GOA|na//molecular function|steryl-sulfatase activity|IEA|GO:0004773|GOA|na//molecular function|sulfuric ester hydrolase activity|IDA|GO:000848	Sts	Yes	No	16	F	M	N	2	0	1	FMN20	16	Yes	FMM	1	1
A_32_P59549	chr10:118030342-118030401	GFRA1	NM_145793	GDNF family receptor alpha 1	molecular function|glial cell line-derived neurotrophic factor receptor activity|TAS|GO:0016167|GOA|10829012//molecular function|receptor activity|NAS|GO:0004872|GOA|na//molecular function|receptor binding|TAS|GO:0005102|GOA|9545641//biological process|ce	Gfra1	Yes	No	14	F	M	N	2	0	1	FMN20	16	Yes	FMM	1	1
A_32_P66908	chr4:105389789-105389848	CXXC4	AK127778	CXXC finger 4	molecular function|DNA binding|IEA|GO:0003677|GOA|na//molecular function|PDZ domain binding|IPI|GO:0030165|GOA|11113207//molecular function|metal ion binding|IEA|GO:0046872|GOA|na//molecular function|zinc ion binding|IEA|GO:0008270|GOA|na//biological proc	Cxxc4	Yes	Yes	16	F	M	N	2	0	1	FMN20	16	No
A_32_P141612	chr2:148691768-148691827	ORC4L	NM_181742	Origin recognition complex, subunit 4-like (yeast)	molecular function|ATP binding|IEA|GO:0005524|GOA|na//molecular function|DNA binding|IEA|GO:0003677|GOA|na//molecular function|DNA replication origin binding|IMP|GO:0003688|GOA|9353276//molecular function|nucleoside-triphosphatase activity|IEA|GO:0017111|	Orc4l	Yes	Yes	14	F	M	N	2	0	1	FMN20	16	No
A_23_P216108	chr8:41513069-41513128	ANK1	NM_020480	Ankyrin 1, erythrocytic	molecular function|cytoskeletal adaptor activity|IDA|GO:0008093|GOA|379653//molecular function|cytoskeletal adaptor activity|TAS|GO:0008093|GOA|11427698//molecular function|enzyme binding|TAS|GO:0019899|GOA|11427698//molecular function|protein binding|IPI	Ank1	Yes	No	14	F	M	N	2	0	1	FMN20	16	No
A_24_P925413	chr5:79032030-79032089	CMYA5	NM_153610	Cardiomyopathy associated 5	molecular function|identical protein binding|IEA|GO:0042802|GOA|na//molecular function|protein binding|IPI|GO:0005515|GOA|17353931//cellular component|cytoplasm|IEA|GO:0005737|GOA|na//cellular component|perinuclear region of cytoplasm|IEA|GO:0048471|GOA|n	Cmya5	Yes	No	16	F	M	N	2	0	1	FMN20	16	No
A_24_P322867	chr11:1577507-1577566	DUSP8	NM_004420	Dual specificity phosphatase 8	molecular function|MAP kinase tyrosine/serine/threonine phosphatase activity|IEA|GO:0017017|GOA|na//molecular function|hydrolase activity|IEA|GO:0016787|GOA|na//molecular function|protein tyrosine phosphatase activity|IEA|GO:0004725|GOA|na//biological pro	Dusp8	Yes	No	14	F	M	N	2	0	1	FMN20	16	No
A_24_P555791	chr15:28501076-28501135	HERC2	NM_004667	Hect domain and RLD 2	molecular function|acid-amino acid ligase activity|IEA|GO:0016881|GOA|na//molecular function|guanyl-nucleotide exchange factor activity|NAS|GO:0005085|GOA|9949213//molecular function|heme binding|IEA|GO:0020037|GOA|na//molecular function|ligase activity|I	Herc2	Yes	No	14	F	M	N	2	0	1	FMN20	16	No
A_32_P332320	chr12:117648139-117648198	NOS1	BC010126	Nitric oxide synthase 1 (neuronal)	molecular function|FAD binding|ISS|GO:0050660|GOA|na//molecular function|FMN binding|ISS|GO:0010181|GOA|na//molecular function|NADP or NADPH binding|ISS|GO:0050661|GOA|na//molecular function|arginine binding|TAS|GO:0034618|GOA|17029414//molecular function	Nos1	Yes	No	16	F	M	N	2	0	1	FMN20	16	No
A_23_P167812	chr6:17293731-17293790	RBM24	NM_153020	RNA binding motif protein 24	molecular function|RNA binding|IEA|GO:0003723|GOA|na//molecular function|nucleotide binding|IEA|GO:0000166|GOA|na//cellular component|cytoplasm|IEA|GO:0005737|GOA|na//cellular component|nucleus|IEA|GO:0005634|GOA|na	Rbm24	Yes	No	15	F	M	N	2	0	1	FMN20	16	No
A_24_P81691	chr11:130780176-130780235	SNX19	NM_014758	Sorting nexin 19	molecular function|phosphoinositide binding|IEA|GO:0035091|GOA|na//molecular function|protein binding|IPI|GO:0005515|GOA|16273344//biological process|cell communication|IEA|GO:0007154|GOA|na//biological process|protein transport|IEA|GO:0015031|GOA|na	Snx19	Yes	No	15	F	M	N	2	0	1	FMN20	16	No
A_32_P120863	chr2:37132728-37143247	STRN	NM_003162	Striatin, calmodulin binding protein	molecular function|armadillo repeat domain binding|IPI|GO:0070016|GOA|18502210//molecular function|calmodulin binding|ISS|GO:0005516|GOA|na//molecular function|calmodulin binding|NAS|GO:0005516|GOA|ARRAY(0x2978a50)//molecular function|estrogen receptor bi	Strn	Yes	No	15	F	M	N	2	0	1	FMN20	16	No
A_24_P178106	chr5:112871382-112871441	YTHDC2	NM_022828	YTH domain containing 2	molecular function|ATP binding|IEA|GO:0005524|GOA|na//molecular function|ATP-dependent helicase activity|IEA|GO:0008026|GOA|na//molecular function|helicase activity|IEA|GO:0004386|GOA|na//molecular function|hydrolase activity|IEA|GO:0016787|GOA|na//molecu	Ythdc2	Yes	No	15	F	M	N	2	0	1	FMN20	16	No
A_24_P143599	chr13:113460565-113460608	ATP11A	NM_032189	ATPase, class VI, type 11A	molecular function|ATP binding|IEA|GO:0005524|GOA|na//molecular function|ATPase activity, coupled to transmembrane movement of ions, phosphorylative mechanism|IEA|GO:0015662|GOA|na//molecular function|hydrolase activity|IEA|GO:0016787|GOA|na//molecular fu	Atp11a	Yes	No	14	F	M	N	2	1	1	FMN21	5	Yes	FMM	1	1
A_23_P14841	chr15:64462076-64462135	CSNK1G1	NM_022048	Casein kinase 1, gamma 1	molecular function|ATP binding|IEA|GO:0005524|GOA|na//molecular function|nucleotide binding|IEA|GO:0000166|GOA|na//molecular function|protein serine/threonine kinase activity|IEA|GO:0004674|GOA|na//molecular function|transferase activity|IEA|GO:0016740|GO	Csnk1g1	Yes	No	14	F	M	N	2	1	1	FMN21	5	No
A_24_P52697	chr11:2016674-2016733	H19	NR_002196	0	0	H19	Yes	No	16	F	M	N	2	1	1	FMN21	5	No
A_24_P509420	chr5:95128848-95128907	RHOBTB3	NM_014899	Rho-related BTB domain containing 3	molecular function|ATP binding|IDA|GO:0005524|GOA|19490898//molecular function|ATPase activity|IDA|GO:0016887|GOA|19490898//molecular function|Rab GTPase binding|IPI|GO:0017137|GOA|19490898//molecular function|hydrolase activity|IEA|GO:0016787|GOA|na//mol	Rhobtb3	Yes	No	14	F	M	N	2	1	1	FMN21	5	No
A_24_P924721	chr15:63340846-63340905	TPM1	NM_001018008	Tropomyosin 1 (alpha)	molecular function|actin binding|TAS|GO:0003779|GOA|12686598//molecular function|structural constituent of cytoskeleton|TAS|GO:0005200|GOA|12686598//molecular function|structural constituent of muscle|TAS|GO:0008307|GOA|8205619//biological process|cardiac	Tpm1	Yes	No	15	F	M	N	2	1	1	FMN21	5	No
A_23_P165295	chr19:13136196-13136255	NFIX	NM_002501	Nuclear factor I/X (CCAAT-binding transcription factor)	molecular function|RNA polymerase II transcription factor activity, enhancer binding|TAS|GO:0003705|GOA|7937100//molecular function|transcription factor activity|TAS|GO:0003700|GOA|ARRAY(0x2f2c6f0)//biological process|DNA replication|IEA|GO:0006260|GOA|na	Nfix	Yes	Yes	14	F	M	N	2	2	1	FMN22	14	Yes	FMF	1	1
A_24_P275386	chr12:125510811-125510870	BRI3BP	AK055703	BRI3 binding protein	cellular component|integral to membrane|IEA|GO:0016021|GOA|na//cellular component|membrane|IEA|GO:0016020|GOA|na	Bri3bp	Yes	No	14	F	M	N	2	2	1	FMN22	14	Yes	FMF	1	1
A_32_P22191	chr3:107364682-107364725	BBX	NM_020235	Bobby sox homolog (Drosophila)	molecular function|DNA binding|IEA|GO:0003677|GOA|na//biological process|regulation of transcription|IEA|GO:0045449|GOA|na//cellular component|nucleus|IEA|GO:0005634|GOA|na	Bbx	Yes	Yes	15	F	M	N	2	2	1	FMN22	14	No
A_24_P191207	chr1:151091442-151091501	GABPB2	BC027033	GA binding protein transcription factor, beta subunit 2	molecular function|protein homodimerization activity|IEA|GO:0042803|GOA|na//biological process|regulation of transcription|IEA|GO:0045449|GOA|na//cellular component|nucleus|IEA|GO:0005634|GOA|na	Gabpb2	Yes	Yes	16	F	M	N	2	2	1	FMN22	14	No
A_24_P230916	chr1:67424625-67424666	MIER1	NM_020948	Mesoderm induction early response 1 homolog (Xenopus laevis)	molecular function|DNA binding|IEA|GO:0003677|GOA|na//molecular function|signal transducer activity|IMP|GO:0004871|GOA|12761501//biological process|positive regulation of I-kappaB kinase/NF-kappaB cascade|IMP|GO:0043123|GOA|12761501//biological process|re	Mier1	Yes	Yes	15	F	M	N	2	2	1	FMN22	14	No
A_24_P418294	chr3:101476920-101476979	CEP97	NM_024548	Centrosomal protein 97kDa	molecular function|protein binding|IPI|GO:0005515|GOA|ARRAY(0x42f1ddc)//cellular component|centrosome|IDA|GO:0005813|GOA|18029348//cellular component|cytoplasm|IDA|GO:0005737|GOA|18029348//cellular component|cytoskeleton|IEA|GO:0005856|GOA|na	Cep97	Yes	No	14	F	M	N	2	2	1	FMN22	14	No
A_24_P208897	chr4:73927566-73927625	COX18	NM_173827	COX18 cytochrome c oxidase assembly homolog (S. cerevisiae)	molecular function|protein transporter activity|IGI|GO:0008565|GOA|16911509//biological process|protein insertion into mitochondrial membrane|IGI|GO:0051204|GOA|16911509//biological process|respiratory chain complex IV assembly|IGI|GO:0008535|GOA|16911509	Cox18	Yes	No	14	F	M	N	2	2	1	FMN22	14	No
A_24_P102504	chr3:108363605-108365499	DZIP3	NM_014648	DAZ interacting protein 3, zinc finger	molecular function|RNA binding|IDA|GO:0003723|GOA|12538761//molecular function|ligase activity|IEA|GO:0016874|GOA|na//molecular function|metal ion binding|IEA|GO:0046872|GOA|na//molecular function|polyubiquitin binding|IDA|GO:0031593|GOA|12538761//molecul	Dzip3	Yes	No	15	F	M	N	2	2	1	FMN22	14	No
A_23_P384663	chr10:28345474-28345533	MPP7	NM_173496	Membrane protein, palmitoylated 7 (MAGUK p55 subfamily member 7)	molecular function|protein binding|IEA|GO:0005515|GOA|na//cellular component|adherens junction|IEA|GO:0005912|GOA|na//cellular component|cell junction|IEA|GO:0030054|GOA|na//cellular component|membrane|IEA|GO:0016020|GOA|na//cellular component|tight junct	Mpp7	Yes	No	14	F	M	N	2	2	1	FMN22	14	No
A_32_P68050	chr4:170347297-170347344	NEK1	NM_012224	NIMA (never in mitosis gene a)-related kinase 1	molecular function|ATP binding|IEA|GO:0005524|GOA|na//molecular function|metal ion binding|IEA|GO:0046872|GOA|na//molecular function|nucleotide binding|IEA|GO:0000166|GOA|na//molecular function|protein binding|IPI|GO:0005515|GOA|ARRAY(0x1c524d4)//molecula	Nek1	Yes	No	16	F	M	N	2	2	1	FMN22	14	No
A_24_P830690	chr16:2631645-2631704	PDPK1	NM_031268	3-phosphoinositide dependent protein kinase-1	molecular function|3-phosphoinositide-dependent protein kinase activity|EXP|GO:0004676|GOA|9768361//molecular function|3-phosphoinositide-dependent protein kinase activity|IDA|GO:0004676|GOA|9368760//molecular function|ATP binding|IEA|GO:0005524|GOA|na//m	Pdpk1	Yes	No	14	F	M	N	2	2	1	FMN22	14	No
A_23_P382302	chr2:152320022-152320081	RIF1	NM_018151	RAP1 interacting factor homolog (yeast)	molecular function|binding|IEA|GO:0005488|GOA|na//biological process|cell cycle|IEA|GO:0007049|GOA|na//biological process|response to DNA damage stimulus|IEA|GO:0006974|GOA|na//cellular component|chromosome|IEA|GO:0005694|GOA|na//cellular component|chromo	Rif1	Yes	No	16	F	M	N	2	2	1	FMN22	14	No
A_24_P347566	chr15:63133422-63133481	TLN2	NM_015059	Talin 2	molecular function|actin binding|NAS|GO:0003779|GOA|10320934//molecular function|insulin receptor binding|IEA|GO:0005158|GOA|na//molecular function|protein binding|IPI|GO:0005515|GOA|10320934//molecular function|structural constituent of cytoskeleton|IEA|	Tln2	Yes	No	15	F	M	N	2	2	1	FMN22	14	No
A_24_P68275	chr9:88967618-88967677	ZCCHC6	NM_024617	Zinc finger, CCHC domain containing 6	molecular function|RNA uridylyltransferase activity|IDA|GO:0050265|GOA|17353264//molecular function|metal ion binding|IEA|GO:0046872|GOA|na//molecular function|nucleic acid binding|IEA|GO:0003676|GOA|na//molecular function|nucleotidyltransferase activity|	Zcchc6	Yes	No	15	F	M	N	2	2	1	FMN22	14	No
A_24_P144936	chr1:35919262-35919291	KIAA0319L	NM_024874	KIAA0319-like	cellular component|integral to membrane|IEA|GO:0016021|GOA|na//cellular component|membrane|IEA|GO:0016020|GOA|na	AU040320	No	No	14	F	N	M	0	0	0	FNM00	3	No
A_23_P11564	chr1:47144128-47144187	KIAA0494	NM_014774	KIAA0494		4732418C07Rik	No	No	16	F	N	M	0	0	0	FNM00	3	No
A_23_P147869	chr4:123193410-123193469	KIAA1109	NM_015312	KIAA1109	cellular component|integral to membrane|IEA|GO:0016021|GOA|na//cellular component|membrane|IEA|GO:0016020|GOA|na	4932438A13Rik	No	No	15	F	N	M	0	0	0	FNM00	3	No
A_23_P139408	chr3:124951184-124951243	ZNF148	NM_021964	Zinc finger protein 148	molecular function|double-stranded DNA binding|IEA|GO:0003690|GOA|na//molecular function|metal ion binding|IEA|GO:0046872|GOA|na//molecular function|protein binding|IPI|GO:0005515|GOA|12771217//molecular function|sequence-specific DNA binding|IDA|GO:0043565|GOA|12771217//molecular function|specific RNA polymerase II transcription factor activity|TAS|GO:0003704|GOA|9685330//molecular function|tran…	Zfp148	No	Yes	16	F	N	M	0	1	1	FNM01	1	No
A_23_P133974	chr6:34574358-34574417	C6orf106	NM_024294	Chromosome 6 open reading frame 106		D17Wsu92e	No	No	14	F	N	M	0	2	1	FNM02	1	No
A_24_P237389	chrX:20142959-20143018	EIF1AX	NM_001412	Eukaryotic translation initiation factor 1A, X-linked	molecular function|RNA binding|IEA|GO:0003723|GOA|na//molecular function|translation factor activity, nucleic acid binding|TAS|GO:0008135|GOA|8106356//molecular function|translation initiation factor activity|IEA|GO:0003743|GOA|na//biological process|translational initiation|IEA|GO:0006413|GOA|na//cellular component|cytoplasm|IDA|GO:0005737|GOA|18029348//cellular component|cytosol|EXP|GO:0005829|…	Eif1a	No	No	16	F	N	M	2	0	1	FNM20	1	Yes	FMM	1	1
A_23_P135878	chr18:12448459-12448518	SPIRE1	NM_020148	Spire homolog 1 (Drosophila)	molecular function|actin binding|IEA|GO:0003779|GOA|na//molecular function|protein binding|IPI|GO:0005515|GOA|17353931//biological process|transport|IEA|GO:0006810|GOA|na//cellular component|cytoplasm|IEA|GO:0005737|GOA|na//cellular component|cytoskeleton	Spire1	Yes	No	16	M	F	F	0	0	0	MFF00	4	Yes	MFF	0	1
A_23_P20743	chr9:104237635-104237694	C9orf125	NM_032342	Chromosome 9 open reading frame 125	cellular component|integral to membrane|IEA|GO:0016021|GOA|na//cellular component|membrane|IEA|GO:0016020|GOA|na	2810432L12Rik	No	No	14	M	F	F	0	0	0	MFF00	4	No
A_23_P254863	chr5:43280703-43280762	MGC42105	NM_153361	Serine/threonine-protein kinase NIM1	molecular function|ATP binding|IDA|GO:0005524|GOA|15733851//molecular function|magnesium ion binding|IDA|GO:0000287|GOA|15733851//molecular function|nucleotide binding|IEA|GO:0000166|GOA|na//molecular function|protein serine/threonine kinase activity|IDA|GO:0004674|GOA|15733851//molecular function|transferase activity|IEA|GO:0016740|GOA|na//biological process|protein amino acid phosphorylation|ID…	E130304F04Rik	No	No	14	M	F	F	0	0	0	MFF00	4	No
A_23_P168610	chr7:16818689-16818741	TSPAN13	NM_014399	Tetraspanin 13	cellular component|integral to plasma membrane|TAS|GO:0005887|GOA|10719184//cellular component|membrane|IEA|GO:0016020|GOA|na//cellular component|membrane fraction|TAS|GO:0005624|GOA|10719184	Tspan13	Yes	No	16	M	F	F	0	0	0	MFF00	4	No
A_24_P206679	chr10:54525221-54525280	MBL2	NM_000242	Mannose-binding lectin (protein C) 2, soluble (opsonic defect)	molecular function|bacterial cell surface binding|TAS|GO:0051635|GOA|2477488//molecular function|calcium-dependent protein binding|IPI|GO:0048306|GOA|ARRAY(0x14d7328)//molecular function|eukaryotic cell surface binding|TAS|GO:0043499|GOA|2477488//molecula	Mbl2	Yes	No	15	M	F	F	0	2	1	MFF02	3	Yes	MFM	1	1
A_23_P217637	chrX:100601358-100601418	TIMM8A	NM_004085	Translocase of inner mitochondrial membrane 8 homolog A (yeast)	molecular function|metal ion binding|IEA|GO:0046872|GOA|na//molecular function|protein binding|IPI|GO:0005515|GOA|17353931//biological process|nervous system development|TAS|GO:0007399|GOA|8841189//biological process|protein import into mitochondrial inner membrane|IEA|GO:0045039|GOA|na//biological process|protein transport|IEA|GO:0015031|GOA|na//biological process|transmembrane transport|IEA|GO:…	Timm8a1	No	No	16	M	F	F	0	2	1	MFF02	3	No
A_23_P88559	chr15:58861011-58861070	LIPC	NM_000236	Lipase, hepatic	molecular function|apolipoprotein binding|ISS|GO:0034185|GOA|na//molecular function|heparin binding|IEA|GO:0008201|GOA|na//molecular function|hydrolase activity|IEA|GO:0016787|GOA|na//molecular function|low-density lipoprotein binding|ISS|GO:0030169|GOA|n	Lipc	Yes	No	15	M	F	F	0	2	1	MFF02	3	No
A_23_P82523	chr7:87135313-87135359	ABCB1	NM_000927	ATP-binding cassette, sub-family B (MDR/TAP), member 1	molecular function|ATP binding|IEA|GO:0005524|GOA|na//molecular function|ATPase activity|IEA|GO:0016887|GOA|na//molecular function|ATPase activity, coupled to transmembrane movement of substances|TAS|GO:0042626|GOA|3022150//molecular function|hydrolase activity|IEA|GO:0016787|GOA|na//molecular function|nucleotide binding|IEA|GO:0000166|GOA|na//molecular function|protein binding|IPI|GO:0005515|GOA…	Abcb1a	No	No	15	M	F	F	1	0	1	MFF10	5	Yes	MFF	1	1
A_23_P154605	chr20:46286424-46286483	SULF2	NM_198596	Sulfatase 2	molecular function|arylsulfatase activity|IDA|GO:0004065|GOA|12368295//molecular function|calcium ion binding|IEA|GO:0005509|GOA|na//molecular function|hydrolase activity|IEA|GO:0016787|GOA|na//biological process|heparan sulfate proteoglycan metabolic pro	Sulf2	Yes	No	14	M	F	F	1	0	1	MFF10	5	Yes	MFF	1	1
A_24_P60441	chr4:5815695-5815754	EVC	NM_153717	Ellis van Creveld syndrome	biological process|cartilage development|IEA|GO:0051216|GOA|na//biological process|muscle organ development|TAS|GO:0007517|GOA|10700184//biological process|skeletal system development|TAS|GO:0001501|GOA|10700184//cellular component|integral to membrane|IE	Evc	Yes	No	16	M	F	F	1	0	1	MFF10	5	No
A_23_P27265	chr18:65178320-65178379	DSEL	NM_032160	Dermatan sulfate epimerase-like	molecular function|isomerase activity|IEA|GO:0016853|GOA|na//molecular function|sulfotransferase activity|IEA|GO:0008146|GOA|na//cellular component|integral to membrane|IEA|GO:0016021|GOA|na//cellular component|membrane|IEA|GO:0016020|GOA|na	Dsel	Yes	No	14	M	F	F	1	0	1	MFF10	5	No
A_23_P214291	chr6:52357082-52357141	EFHC1	NR_033327	0	0	Efhc1	Yes	No	14	M	F	F	1	0	1	MFF10	5	No
A_24_P294408	chr3:119348247-119348306	PLA1A	NM_015900	Phospholipase A1 member A	molecular function|hydrolase activity|IEA|GO:0016787|GOA|na//molecular function|phospholipase A1 activity|TAS|GO:0008970|GOA|10196188//biological process|lipid catabolic process|IEA|GO:0016042|GOA|na//biological process|lipid metabolic process|TAS|GO:0006	Pla1a	Yes	No	14	M	F	F	1	1	1	MFF11	5	Yes	MFF	1	1
A_23_P201179	chr1:114240019-114240078	PHTF1	AJ011863	Putative homeodomain transcription factor 1	molecular function|transcription factor activity|TAS|GO:0003700|GOA|10729229//biological process|regulation of transcription|IEA|GO:0045449|GOA|na//cellular component|cis-Golgi network|IEA|GO:0005801|GOA|na//cellular component|endoplasmic reticulum|IEA|GO	Phtf1	Yes	Yes	15	M	F	F	1	1	1	MFF11	5	Yes	MFM	1	1
A_23_P45365	chrX:107940580-107940639	COL4A5	NM_033381	Collagen, type IV, alpha 5	molecular function|extracellular matrix structural constituent|IEA|GO:0005201|GOA|na//molecular function|protein binding|IPI|GO:0005515|GOA|12878203//cellular component|collagen|IEA|GO:0005581|GOA|na//cellular component|collagen type IV|TAS|GO:0005587|GOA	Col4a5	Yes	No	16	M	F	F	1	1	1	MFF11	5	No
A_23_P142631	chr2:24286286-24286345	FKBP1B	NM_054033	FK506 binding protein 1B, 12.6 kDa	molecular function|FK506 binding|IDA|GO:0005528|GOA|7592869//molecular function|isomerase activity|IEA|GO:0016853|GOA|na//molecular function|peptidyl-prolyl cis-trans isomerase activity|IDA|GO:0003755|GOA|7592869//molecular function|protein binding|IPI|GO	Fkbp1b	Yes	No	14	M	F	F	1	1	1	MFF11	5	No
A_23_P200928	chr1:236140300-236140359	NID1	NM_002508	Nidogen 1	molecular function|calcium ion binding|IEA|GO:0005509|GOA|na//molecular function|extracellular matrix binding|IEA|GO:0050840|GOA|na//molecular function|protein binding|IEA|GO:0005515|GOA|na//biological process|bioluminescence|IEA|GO:0008218|GOA|na//biolog	Nid1	Yes	No	15	M	F	F	1	1	1	MFF11	5	No
A_24_P281908	chr12:111655692-111655741	CUX2	NM_015267	Cut-like homeobox 2	molecular function|sequence-specific DNA binding|IEA|GO:0043565|GOA|na//molecular function|transcription factor activity|NAS|GO:0003700|GOA|na//molecular function|transcription repressor activity|IEA|GO:0016564|GOA|na//biological process|negative regulati	Cux2	Yes	Yes	16	M	F	F	1	2	1	MFF12	1	Yes	MFF	1	1
A_23_P96827	chr1:159558017-159558076	APCS	NM_001639	Amyloid P component, serum	molecular function|metal ion binding|IEA|GO:0046872|GOA|na//molecular function|sugar binding|IEA|GO:0005529|GOA|na//molecular function|unfolded protein binding|TAS|GO:0051082|GOA|10812074//biological process|acute-phase response|TAS|GO:0006953|GOA|2987268	Apcs	Yes	No	15	M	F	F	2	0	1	MFF20	1	Yes	MFF	1	1
A_24_P315120	chr9:101829168-101829227	COL15A1	NM_001855	Collagen, type XV, alpha 1	molecular function|extracellular matrix structural constituent|IC|GO:0005201|GOA|9651385//molecular function|protein binding|IEA|GO:0005515|GOA|na//biological process|angiogenesis|IEA|GO:0001525|GOA|na//biological process|cell adhesion|IC|GO:0007155|GOA|9	Col15a1	Yes	No	14	M	F	F	2	2	1	MFF22	1	No
A_23_P305205	chr7:36364603-36364662	KIAA0895	NM_015314	KIAA0895		9530077C05Rik	No	No	15	M	F	N	0	0	0	MFN00	6	No
A_32_P179686	chr17:47370884-47370943	ZNF652	NM_014897	Zinc finger protein 652	molecular function|DNA binding|IEA|GO:0003677|GOA|na//molecular function|metal ion binding|IEA|GO:0046872|GOA|na//molecular function|protein binding|IPI|GO:0005515|GOA|16966434//molecular function|zinc ion binding|IEA|GO:0008270|GOA|na//biological process|regulation of transcription|IEA|GO:0045449|GOA|na//cellular component|intracellular|IEA|GO:0005622|GOA|na//cellular component|nucleus|IEA|GO:00…	Zfp652	No	Yes	15	M	F	N	0	0	0	MFN00	6	No
A_23_P31721	chr8:86126199-86126258	E2F5	NM_001951	E2F transcription factor 5, p130-binding	molecular function|protein binding|TAS|GO:0005515|GOA|7760804//molecular function|transcription factor activity|IEA|GO:0003700|GOA|na//molecular function|transcription factor binding|IPI|GO:0008134|GOA|16360038//biological process|regulation of transcript	E2f5	Yes	Yes	14	M	F	N	0	0	0	MFN00	6	No
A_24_P376902	chr2:203642211-203642270	ICA1L	NM_138468	Islet cell autoantigen 1,69kDa-like	0	Ica1l	Yes	No	14	M	F	N	0	0	0	MFN00	6	No
A_23_P380901	chr2:209358543-209358602	PTH2R	NM_005048	Parathyroid hormone 2 receptor	molecular function|parathyroid hormone receptor activity|TAS|GO:0004991|GOA|7797535//biological process|G-protein coupled receptor protein signaling pathway|EXP|GO:0007186|GOA|18240029//biological process|signal transduction|IEA|GO:0007165|GOA|na//cellula	Pth2r	Yes	No	14	M	F	N	0	0	0	MFN00	6	No
A_23_P401076	chr9:95847304-95847363	SUSD3	NM_145006	Sushi domain containing 3	cellular component|integral to membrane|IEA|GO:0016021|GOA|na//cellular component|membrane|IEA|GO:0016020|GOA|na	Susd3	Yes	No	14	M	F	N	0	0	0	MFN00	6	No
A_23_P144337	chr4:139966027-139966086	CCRN4L	NM_012118	CCR4 carbon catabolite repression 4-like (S. cerevisiae)	molecular function|transcription factor activity|TAS|GO:0003700|GOA|10521507//biological process|rhythmic process|IEA|GO:0048511|GOA|na//biological process|transcription from RNA polymerase II promoter|TAS|GO:0006366|GOA|10521507//cellular component|nucle	Ccrn4l	Yes	Yes	14	M	F	N	1	0	1	MFN10	6	Yes	MFF	1	1
A_23_P208752	chr19:36936900-36936959	ZNF566	NM_032838	Zinc finger protein 566	molecular function|DNA binding|IEA|GO:0003677|GOA|na//molecular function|metal ion binding|IEA|GO:0046872|GOA|na//molecular function|zinc ion binding|IEA|GO:0008270|GOA|na//biological process|regulation of transcription, DNA-dependent|IEA|GO:0006355|GOA|na//cellular component|intracellular|IEA|GO:0005622|GOA|na//cellular component|nucleus|IEA|GO:0005634|GOA|na	Zfp566	No	Yes	14	M	F	N	1	0	1	MFN10	6	No
A_32_P54037	chr12:96260902-96260961	CCDC38	NM_182496	Coiled-coil domain containing 38	0	Ccdc38	Yes	No	14	M	F	N	1	0	1	MFN10	6	No
A_23_P212105	chr3:16628817-16628876	DAZL	NM_001351	Deleted in azoospermia-like	molecular function|RNA binding|IEA|GO:0003723|GOA|na//molecular function|nucleotide binding|IEA|GO:0000166|GOA|na//molecular function|protein binding|IPI|GO:0005515|GOA|16001084//molecular function|translation activator activity|IDA|GO:0008494|GOA|1600108	Dazl	Yes	No	16	M	F	N	1	0	1	MFN10	6	No
A_23_P156402	chr5:137454601-137464202	NME5	NM_003551	Non-metastatic cells 5, protein expressed in (nucleoside-diphosphate kinase)	molecular function|ATP binding|IEA|GO:0005524|GOA|na//molecular function|nucleoside diphosphate kinase activity|IEA|GO:0004550|GOA|na//molecular function|protein binding|IPI|GO:0005515|GOA|19447967//biological process|CTP biosynthetic process|IEA|GO:00062	Nme5	Yes	No	16	M	F	N	1	0	1	MFN10	6	No
A_32_P55225	chr1:155868101-155868160	RIT1	NM_006912	Ras-like without CAAX 1	molecular function|GTP binding|IEA|GO:0005525|GOA|na//molecular function|GTPase activity|IEA|GO:0003924|GOA|na//molecular function|calmodulin binding|TAS|GO:0005516|GOA|8918462//molecular function|nucleotide binding|IEA|GO:0000166|GOA|na//molecular functi	Rit1	Yes	No	15	M	F	N	1	0	1	MFN10	6	No
A_23_P62953	chr1:164781270-164781329	PBX1	NM_002585	Pre-B-cell leukemia homeobox 1	molecular function|DNA binding|IDA|GO:0003677|GOA|10052460//molecular function|protein binding|IPI|GO:0005515|GOA|ARRAY(0x19ae984)//molecular function|protein heterodimerization activity|IEA|GO:0046982|GOA|na//molecular function|sequence-specific DNA bind	Pbx1	Yes	Yes	16	M	F	N	1	1	1	MFN11	4	Yes	MFM	1	0
A_23_P72157	chr4:675700-675759	MFSD7	NM_032219	Major facilitator superfamily domain containing 7	biological process|transmembrane transport|IEA|GO:0055085|GOA|na//cellular component|integral to membrane|IEA|GO:0016021|GOA|na//cellular component|membrane|IEA|GO:0016020|GOA|na	Mfsd7a	No	No	16	M	F	N	1	1	1	MFN11	4	No
A_23_P17053	chr2:113743007-113743066	IL1F9	NM_019618	Interleukin 1 family, member 9	molecular function|cytokine activity|IEA|GO:0005125|GOA|na//molecular function|interleukin-1 receptor antagonist activity|IEA|GO:0005152|GOA|na//biological process|cell-cell signaling|TAS|GO:0007267|GOA|10744718//cellular component|extracellular region|IE	Il1f9	Yes	No	14	M	F	N	1	1	1	MFN11	4	No
A_23_P166459	chr22:38075652-38075711	LGALS1	NM_002305	Lectin, galactoside-binding, soluble, 1	molecular function|galactoside binding|IEA|GO:0016936|GOA|na//molecular function|glycoprotein binding|IEA|GO:0001948|GOA|na//molecular function|protein binding|IPI|GO:0005515|GOA|17353931//molecular function|protein homodimerization activity|IEA|GO:004280	Lgals1	Yes	No	15	M	F	N	1	1	1	MFN11	4	No
A_23_P17103	chr2:99614473-99614532	TSGA10	NM_182911	Testis specific, 10	molecular function|molecular_function|ND|GO:0003674|GOA|na//molecular function|structural molecule activity|IEA|GO:0005198|GOA|na//biological process|cell projection assembly|IEA|GO:0030031|GOA|na//biological process|spermatogenesis|TAS|GO:0007283|GOA|111	Tsga10	Yes	No	14	M	F	N	2	0	1	MFN20	1	No
A_24_P196382	chr3:112252293-112252352	ATG3	BC043267	ATG3 autophagy related 3 homolog (S. cerevisiae)	molecular function|enzyme binding|IPI|GO:0019899|GOA|11825910//molecular function|protein binding|IPI|GO:0005515|GOA|ARRAY(0x2f3efa4)//molecular function|small conjugating protein ligase activity|IDA|GO:0019787|GOA|11825910//biological process|autophagic	Atg3	Yes	No	16	M	F	N	2	2	1	MFN22	4	Yes	MFF	1	1
A_24_P398572	chr12:102789726-102789785	IGF1	NM_001111284	Insulin-like growth factor 1 (somatomedin C)	molecular function|growth factor activity|IEA|GO:0008083|GOA|na//molecular function|hormone activity|IDA|GO:0005179|GOA|7188854//molecular function|hormone activity|IEA|GO:0005179|GOA|na//molecular function|insulin receptor binding|IPI|GO:0005158|GOA|8452	Igf1	Yes	No	16	M	F	N	2	2	1	MFN22	4	Yes	MFM	1	1
A_23_P365785	chr2:10140731-10140790	GRHL1	NM_198182	Grainyhead-like 1 (Drosophila)	molecular function|DNA binding|IEA|GO:0003677|GOA|na//biological process|multicellular organismal development|IEA|GO:0007275|GOA|na//biological process|regulation of transcription|IEA|GO:0045449|GOA|na//cellular component|Golgi apparatus|IDA|GO:0005794|GO	Grhl1	Yes	Yes	14	M	F	N	2	2	1	MFN22	4	No
A_32_P503015	chr10:28872398-28872434	WAC	NR_024557	0	0	Wac	Yes	No	14	M	F	N	2	2	1	MFN22	4	No
A_32_P149072	chr3:143709466-143709525	C3orf58	NM_173552	Chromosome 3 open reading frame 58	cellular component|extracellular region|IEA|GO:0005576|GOA|na	1190002N15Rik	No	No	15	M	M	M	0	0	0	MMM00	5	No
A_32_P226186	chr7:138516304-138516363	KIAA1549	NM_020910	KIAA1549	cellular component|integral to membrane|IEA|GO:0016021|GOA|na//cellular component|membrane|IEA|GO:0016020|GOA|na	D630045J12Rik	No	No	14	M	M	M	0	0	0	MMM00	5	No
A_32_P25357	chr16:89261839-89261898	CDH15	NM_004933	Cadherin 15, type 1, M-cadherin (myotubule)	molecular function|calcium ion binding|IEA|GO:0005509|GOA|na//molecular function|protein binding|IEA|GO:0005515|GOA|na//biological process|cell adhesion|IEA|GO:0007155|GOA|na//biological process|homophilic cell adhesion|IEA|GO:0007156|GOA|na//cellular com	Cdh15	Yes	No	15	M	M	M	0	0	0	MMM00	5	No
A_24_P130936	chrY:15027862-15027921	DDX3Y	NM_004660	DEAD (Asp-Glu-Ala-Asp) box polypeptide 3, Y-linked	molecular function|ATP binding|IEA|GO:0005524|GOA|na//molecular function|ATP-dependent helicase activity|IEA|GO:0008026|GOA|na//molecular function|DNA binding|IEA|GO:0003677|GOA|na//molecular function|RNA binding|IEA|GO:0003723|GOA|na//molecular function|	Ddx3y	Yes	Yes	16	M	M	M	0	0	0	MMM00	5	No
A_23_P16798	chr2:24344091-24344150	PFN4	NM_199346	Profilin family, member 4	molecular function|actin binding|IEA|GO:0003779|GOA|na//biological process|actin cytoskeleton organization|IEA|GO:0030036|GOA|na//cellular component|actin cytoskeleton|IEA|GO:0015629|GOA|na//cellular component|cytoplasm|IEA|GO:0005737|GOA|na	Pfn4	Yes	No	14	M	M	M	0	0	0	MMM00	5	No
A_23_P58407	chr4:69512758-69512817	UGT2B15	NM_001076	UDP glucuronosyltransferase 2 family, polypeptide B15	molecular function|glucuronosyltransferase activity|IEA|GO:0015020|GOA|na//biological process|metabolic process|IEA|GO:0008152|GOA|na//biological process|steroid metabolic process|TAS|GO:0008202|GOA|7835232//biological process|xenobiotic metabolic process|TAS|GO:0006805|GOA|7835232//cellular component|endoplasmic reticulum|IEA|GO:0005783|GOA|na//cellular component|endoplasmic reticulum membrane|I…	Ugt2b35	No	No	14	M	M	M	0	1	1	MMM01	1	No
A_23_P53736	chr12:117581809-117581868	FBXO21	NM_033624	F-box protein 21	molecular function|ubiquitin-protein ligase activity|NAS|GO:0004842|GOA|10531035//biological process|ubiquitin-dependent protein catabolic process|NAS|GO:0006511|GOA|10531035//cellular component|ubiquitin ligase complex|NAS|GO:0000151|GOA|10531035	Fbxo21	Yes	No	14	M	M	M	1	1	1	MMM11	4	Yes	MMM	1	1
A_23_P31563	chr7:77584254-77584313	PHTF2	NM_001127358	Putative homeodomain transcription factor 2	molecular function|DNA binding|IEA|GO:0003677|GOA|na//biological process|regulation of transcription|IEA|GO:0045449|GOA|na//cellular component|endoplasmic reticulum|IDA|GO:0005783|GOA|11256614//cellular component|nucleus|IEA|GO:0005634|GOA|na	Phtf2	Yes	Yes	14	M	M	M	1	1	1	MMM11	4	Yes	MMM	1	1
A_23_P7744	chr5:94994279-94994338	SPATA9	NM_031952	Spermatogenesis associated 9	biological process|cell differentiation|IEA|GO:0030154|GOA|na//biological process|multicellular organismal development|IEA|GO:0007275|GOA|na//biological process|spermatogenesis|IEA|GO:0007283|GOA|na//cellular component|integral to membrane|IEA|GO:0016021|	Spata9	Yes	No	14	M	M	M	1	1	1	MMM11	4	No
A_23_P257231	chr4:109663266-109663325	AGXT2L1	NR_027475	0	0	Agxt2l1	Yes	No	14	M	M	M	1	1	1	MMM11	4	No
A_24_P273583	chr1:9330937-9330996	H6PD	NM_004285	Hexose-6-phosphate dehydrogenase (glucose 1-dehydrogenase)	molecular function|6-phosphogluconolactonase activity|IEA|GO:0017057|GOA|na//molecular function|binding|IEA|GO:0005488|GOA|na//molecular function|glucose 1-dehydrogenase activity|IEA|GO:0047936|GOA|na//molecular function|glucose-6-phosphate dehydrogenase	H6pd	Yes	No	16	M	M	M	2	0	1	MMM20	6	Yes	MMM	1	0
A_24_P254101	chr19:32975930-32975989	DPY19L3	NM_207325	Dpy-19-like 3 (C. elegans)	cellular component|integral to membrane|IEA|GO:0016021|GOA|na//cellular component|membrane|IEA|GO:0016020|GOA|na	Dpy19l3	Yes	No	15	M	M	M	2	0	1	MMM20	6	Yes	MMM	1	1
A_23_P10966	chr15:26792524-26792583	GABRB3	NM_021912	Gamma-aminobutyric acid (GABA) A receptor, beta 3	molecular function|GABA-A receptor activity|IEA|GO:0004890|GOA|na//molecular function|chloride channel activity|IEA|GO:0005254|GOA|na//molecular function|extracellular ligand-gated ion channel activity|IEA|GO:0005230|GOA|na//molecular function|ion channel	Gabrb3	Yes	No	14	M	M	M	2	0	1	MMM20	6	No
A_32_P175715	chr10:15014542-15014601	MEIG1	NM_001080836	Meiosis expressed gene 1 homolog (mouse)	molecular function|protein binding|IEA|GO:0005515|GOA|na//cellular component|nucleus|IEA|GO:0005634|GOA|na	Meig1	Yes	No	15	M	M	M	2	0	1	MMM20	6	No
A_24_P94402	chr2:16086767-16086826	MYCN	NM_005378	V-myc myelocytomatosis viral related oncogene, neuroblastoma derived (avian)	molecular function|DNA binding|TAS|GO:0003677|GOA|10597290//molecular function|protein binding|IPI|GO:0005515|GOA|ARRAY(0x2ee84d4)//molecular function|transcription factor activity|IEA|GO:0003700|GOA|na//biological process|branching morphogenesis of a tub	Mycn	Yes	Yes	15	M	M	M	2	0	1	MMM20	6	No
A_23_P10559	chr17:79091195-79091254	AATK	NM_001080395	Apoptosis-associated tyrosine kinase	molecular function|ATP binding|IEA|GO:0005524|GOA|na//molecular function|nucleotide binding|IEA|GO:0000166|GOA|na//molecular function|protein binding|IPI|GO:0005515|GOA|14521924//molecular function|protein serine/threonine kinase activity|IEA|GO:0004674|G	Aatk	Yes	No	16	M	M	M	2	0	1	MMM20	6	No
A_24_P393658	chr6:83877201-83877260	PGM3	AL117443	Phosphoglucomutase 3	molecular function|isomerase activity|IEA|GO:0016853|GOA|na//molecular function|magnesium ion binding|IEA|GO:0000287|GOA|na//molecular function|phosphoacetylglucosamine mutase activity|IDA|GO:0004610|GOA|11004509//molecular function|phosphoglucomutase act	Pgm3	Yes	No	15	M	M	M	2	1	1	MMM21	2	Yes	MMM	1	0
A_23_P146551	chr9:27329620-27329679	MOBKL2B	NM_024761	MOB1, Mps One Binder kinase activator-like 2B (yeast)	molecular function|metal ion binding|IEA|GO:0046872|GOA|na//molecular function|protein binding|IPI|GO:0005515|GOA|ARRAY(0x42fe2ec)	Mobkl2b	Yes	No	14	M	M	M	2	1	1	MMM21	2	No
A_23_P363936	chr4:128754250-128754309	HSPA4L	NM_014278	Heat shock 70kDa protein 4-like	molecular function|ATP binding|ISS|GO:0005524|GOA|na//molecular function|nucleotide binding|IEA|GO:0000166|GOA|na//molecular function|protein binding|IPI|GO:0005515|GOA|17353931//biological process|protein folding|ISS|GO:0006457|GOA|na//biological process	Hspa4l	Yes	No	15	M	M	M	2	2	1	MMM22	3	Yes	MMF	1	1
A_24_P17691	chr4:69403394-69403453	UGT2B17	NM_001077	UDP glucuronosyltransferase 2 family, polypeptide B17	molecular function|glucuronosyltransferase activity|IEA|GO:0015020|GOA|na//biological process|metabolic process|IEA|GO:0008152|GOA|na//biological process|steroid metabolic process|TAS|GO:0008202|GOA|8798464//cellular component|endoplasmic reticulum|IEA|GO:0005783|GOA|na//cellular component|endoplasmic reticulum membrane|IEA|GO:0005789|GOA|na//cellular component|integral to membrane|IEA|GO:0016021…	Ugt2b5	No	No	15	M	M	M	2	2	1	MMM22	3	No
A_23_P95755	chr10:6275146-6275205	PFKFB3	NM_004566	6-phosphofructo-2-kinase/fructose-2,6-biphosphatase 3	molecular function|6-phosphofructo-2-kinase activity|EXP|GO:0003873|GOA|15896703//molecular function|6-phosphofructo-2-kinase activity|NAS|GO:0003873|GOA|8830046//molecular function|ATP binding|IEA|GO:0005524|GOA|na//molecular function|fructose-2,6-bispho	Pfkfb3	Yes	No	14	M	M	M	2	2	1	MMM22	3	No
A_23_P89902	chr19:45988786-45988845	RTN2	NM_206901	Reticulon 2	molecular function|signal transducer activity|NAS|GO:0004871|GOA|na//biological process|signal transduction|NAS|GO:0007165|GOA|na//cellular component|endoplasmic reticulum|IEA|GO:0005783|GOA|na//cellular component|endoplasmic reticulum membrane|IEA|GO:000	Rtn2	Yes	No	15	M	M	N	0	0	0	MMN00	2	No
A_32_P209250	chrY:15592470-15592529	UTY	NM_182660	Ubiquitously transcribed tetratricopeptide repeat gene, Y-linked	molecular function|binding|IEA|GO:0005488|GOA|na//molecular function|metal ion binding|IEA|GO:0046872|GOA|na//molecular function|oxidoreductase activity|IEA|GO:0016491|GOA|na//molecular function|oxidoreductase activity, acting on single donors with incorp	Uty	Yes	No	16	M	M	N	0	0	0	MMN00	2	No
A_23_P259442	chr4:166419232-166419291	CPE	NM_001873	Carboxypeptidase E	molecular function|carboxypeptidase activity|TAS|GO:0004180|GOA|9019408//molecular function|metal ion binding|IEA|GO:0046872|GOA|na//molecular function|metallocarboxypeptidase activity|IEA|GO:0004181|GOA|na//molecular function|metallopeptidase activity|IE	Cpe	Yes	No	15	M	M	N	0	1	1	MMN01	3	No
A_32_P54594	chr22:30093923-30093982	NF2	NM_181833	Neurofibromin 2 (merlin)	molecular function|cytoskeletal protein binding|IEA|GO:0008092|GOA|na//molecular function|protein binding|IPI|GO:0005515|GOA|ARRAY(0x2ecbf74)//biological process|Schwann cell proliferation|IMP|GO:0014010|GOA|17353411//biological process|actin cytoskeleton	Nf2	Yes	No	15	M	M	N	0	1	1	MMN01	3	No
A_23_P38334	chr17:40948759-40948818	WNK4	NM_032387	WNK lysine deficient protein kinase 4	molecular function|ATP binding|ISS|GO:0005524|GOA|na//molecular function|nucleotide binding|IEA|GO:0000166|GOA|na//molecular function|protein binding|IEA|GO:0005515|GOA|na//molecular function|protein serine/threonine kinase activity|ISS|GO:0004674|GOA|na/	Wnk4	Yes	No	14	M	M	N	0	1	1	MMN01	3	No
A_23_P138492	chr10:105350215-105350274	NEURL	NM_004210	Neuralized homolog (Drosophila)	molecular function|metal ion binding|IEA|GO:0046872|GOA|na//molecular function|protein binding|IEA|GO:0005515|GOA|na//molecular function|zinc ion binding|IEA|GO:0008270|GOA|na//biological process|lactation|IEA|GO:0007595|GOA|na//biological process|nervous	Neurl1a	No	No	14	M	M	N	2	0	1	MMN20	6	No
A_23_P324384	chrY:22941435-22941494	RPS4Y2	NM_001039567	Ribosomal protein S4, Y-linked 2	molecular function|rRNA binding|IEA|GO:0019843|GOA|na//molecular function|structural constituent of ribosome|IEA|GO:0003735|GOA|na//biological process|translation|IEA|GO:0006412|GOA|na//cellular component|intracellular|IEA|GO:0005622|GOA|na//cellular comp	Gm9294	No	No	16	M	M	N	2	0	1	MMN20	6	No
A_23_P413634	chr19:58637916-58637975	ZNF329	NM_024620	Zinc finger protein 329	molecular function|DNA binding|IEA|GO:0003677|GOA|na//molecular function|metal ion binding|IEA|GO:0046872|GOA|na//molecular function|zinc ion binding|IEA|GO:0008270|GOA|na//biological process|regulation of transcription|IEA|GO:0045449|GOA|na//cellular component|intracellular|IEA|GO:0005622|GOA|na//cellular component|nucleus|IEA|GO:0005634|GOA|na	Zfp329	No	Yes	16	M	M	N	2	0	1	MMN20	6	No
A_32_P208868	chr3:5260056-5260115	EDEM1	NM_014674	ER degradation enhancer, mannosidase alpha-like 1	molecular function|calcium ion binding|IEA|GO:0005509|GOA|na//molecular function|mannosyl-oligosaccharide 1,2-alpha-mannosidase activity|IEA|GO:0004571|GOA|na//molecular function|misfolded protein binding|IDA|GO:0051787|GOA|19524542//molecular function|pr	Edem1	Yes	No	14	M	M	N	2	0	1	MMN20	6	No
A_24_P38572	chr9:33464877-33464935	NOL6	NM_022917	Nucleolar protein family 6 (RNA-associated)	molecular function|RNA binding|ISS|GO:0003723|GOA|11895476//biological process|rRNA processing|ISS|GO:0006364|GOA|na//cellular component|condensed nuclear chromosome|ISS|GO:0000794|GOA|11895476//cellular component|nucleolus|ISS|GO:0005730|GOA|11895476//ce	Nol6	Yes	No	15	M	M	N	2	0	1	MMN20	6	No
A_23_P503010	chr14:92962507-92962566	SLC24A4	NM_153648	Solute carrier family 24 (sodium/potassium/calcium exchanger), member 4	molecular function|antiporter activity|IEA|GO:0015297|GOA|na//molecular function|symporter activity|IEA|GO:0015293|GOA|na//biological process|calcium ion transport|IEA|GO:0006816|GOA|na//biological process|ion transport|IEA|GO:0006811|GOA|na//biological p	Slc24a4	Yes	No	15	M	M	N	2	0	1	MMN20	6	No
A_23_P128375	chr12:110208051-110208110	C12orf34	NM_032829	Chromosome 12 open reading frame 34		BC057022	No	No	14	M	M	N	2	2	1	MMN22	3	No
A_23_P212204	chr3:9520291-9520350	SETD5	BX648380	SET domain containing 5	0	Setd5	Yes	No	15	M	M	N	2	2	1	MMN22	3	No
A_32_P86517	chr12:46754585-46754644	SLC38A2	NM_018976	Solute carrier family 38, member 2	molecular function|amino acid transmembrane transporter activity|EXP|GO:0015171|GOA|10930503//molecular function|symporter activity|IEA|GO:0015293|GOA|na//biological process|amino acid transport|EXP|GO:0006865|GOA|18195088//biological process|ion transpor	Slc38a2	Yes	No	14	M	M	N	2	2	1	MMN22	3	No
A_23_P153676	chr19:2997884-2997943	TLE2	NM_003260	Transducin-like enhancer of split 2 (E(sp1) homolog, Drosophila)	molecular function|protein binding|IPI|GO:0005515|GOA|17041588//biological process|Wnt receptor signaling pathway|IEA|GO:0016055|GOA|na//biological process|organ morphogenesis|TAS|GO:0009887|GOA|8808280//biological process|regulation of transcription|IEA|	Tle2	Yes	Yes	14	M	N	M	0	0	0	MNM00	9	Yes	MMF	0	1
A_23_P49865	chr17:7191590-7191649	YBX2	NM_015982	Y box binding protein 2	molecular function|DNA binding|IEA|GO:0003677|GOA|na//molecular function|chromatin binding|IEA|GO:0003682|GOA|na//molecular function|lipid binding|IEA|GO:0008289|GOA|na//molecular function|mRNA binding|IEA|GO:0003729|GOA|na//molecular function|ribonucleop	Ybx2	Yes	Yes	15	M	N	M	0	0	0	MNM00	9	No
A_32_P118372	chr4:128635137-128635196	INTU	NM_015693	Inturned planar cell polarity effector homolog (Drosophila)	molecular function|protein binding|IEA|GO:0005515|GOA|na	Intu	Yes	No	15	M	N	M	0	0	0	MNM00	9	No
A_23_P218002	chr11:57156585-57156644	PRG2	NM_002728	Proteoglycan 2, bone marrow (natural killer cell activator, eosinophil granule major basic protein)	molecular function|binding|IEA|GO:0005488|GOA|na//molecular function|heparin binding|IEA|GO:0008201|GOA|na//molecular function|sugar binding|IEA|GO:0005529|GOA|na//biological process|defense response to bacterium|IEA|GO:0042742|GOA|na//biological process|	Prg2	Yes	No	14	M	N	M	0	0	0	MNM00	9	No
A_24_P12413	chr6:52362555-52362614	TRAM2	NM_012288	Translocation associated membrane protein 2	molecular function|protein binding|IPI|GO:0005515|GOA|14749390//biological process|collagen biosynthetic process|IMP|GO:0032964|GOA|14749390//biological process|protein transport|IEA|GO:0015031|GOA|na//biological process|transmembrane transport|IEA|GO:005	Tram2	Yes	No	14	M	N	M	0	0	0	MNM00	9	No
A_23_P364324	chr7:48686854-48686913	ABCA13	NM_152701	ATP-binding cassette, sub-family A (ABC1), member 13	molecular function|ATP binding|IEA|GO:0005524|GOA|na//molecular function|ATPase activity|IEA|GO:0016887|GOA|na//molecular function|nucleotide binding|IEA|GO:0000166|GOA|na//biological process|transport|IEA|GO:0006810|GOA|na//cellular component|integral to	Abca13	Yes	No	15	M	N	M	0	0	0	MNM00	9	No
A_23_P100501	chr16:4559722-4559781	HMOX2	NM_002134	Heme oxygenase (decycling) 2	molecular function|electron carrier activity|IDA|GO:0009055|GOA|1575508//molecular function|heme oxygenase (decyclizing) activity|IDA|GO:0004392|GOA|1575508//molecular function|metal ion binding|IEA|GO:0046872|GOA|na//molecular function|oxidoreductase act	Hmox2	Yes	No	15	M	N	M	0	0	0	MNM00	9	No
A_23_P112004	chr8:133584584-133584643	LRRC6	NM_012472	Leucine rich repeat containing 6	molecular function|molecular_function|ND|GO:0003674|GOA|na//biological process|biological_process|ND|GO:0008150|GOA|na//cellular component|cellular_component|ND|GO:0005575|GOA|na//cellular component|cytoplasm|IEA|GO:0005737|GOA|na	Lrrc6	Yes	No	15	M	N	M	0	0	0	MNM00	9	No
A_23_P137226	chrY:14971461-14971520	USP9Y	NM_004654	Ubiquitin specific peptidase 9, Y-linked	molecular function|co-SMAD binding|ISS|GO:0070410|GOA|na//molecular function|cysteine-type peptidase activity|IEA|GO:0008234|GOA|na//molecular function|peptidase activity|IEA|GO:0008233|GOA|na//molecular function|ubiquitin thiolesterase activity|IEA|GO:00	Usp9y	Yes	No	16	M	N	M	0	0	0	MNM00	9	No
A_32_P223918	chr12:12045357-12045416	ETV6	NM_001987	Ets variant 6	molecular function|protein binding|IPI|GO:0005515|GOA|12590135//molecular function|protein domain specific binding|IPI|GO:0019904|GOA|12588862//molecular function|sequence-specific DNA binding|IEA|GO:0043565|GOA|na//molecular function|transcription factor	Etv6	Yes	Yes	15	M	N	M	0	1	1	MNM01	1	No
A_32_P136588	chr16:74482305-74482364	GLG1	NR_027265	0	0	Glg1	Yes	No	14	M	N	M	0	2	1	MNM02	1	No
A_32_P167471	chr14:95648617-95648676	CLMN	NM_024734	Calmin (calponin-like, transmembrane)	molecular function|actin binding|IEA|GO:0003779|GOA|na//cellular component|cytoplasm|IEA|GO:0005737|GOA|na//cellular component|integral to membrane|IEA|GO:0016021|GOA|na//cellular component|membrane|IEA|GO:0016020|GOA|na	Clmn	Yes	No	14	M	N	M	1	1	1	MNM11	1	No
A_24_P915149	chr17:36883647-36883703	MLLT6	NM_005937	Myeloid/lymphoid or mixed-lineage leukemia (trithorax homolog, Drosophila); translocated to, 6	molecular function|metal ion binding|IEA|GO:0046872|GOA|na//molecular function|protein binding|IPI|GO:0005515|GOA|16713569//molecular function|zinc ion binding|IEA|GO:0008270|GOA|na//biological process|regulation of transcription, DNA-dependent|TAS|GO:000	Mllt6	Yes	Yes	14	M	N	M	1	2	1	MNM12	1	No
A_32_P174083	chr7:25158320-25158379	CYCS	NM_018947	Cytochrome c, somatic	molecular function|electron transporter, transferring electrons from CoQH2-cytochrome c reductase complex and cytochrome c oxidase complex activity|IDA|GO:0045155|GOA|8689682//molecular function|heme binding|TAS|GO:0020037|GOA|9515723//molecular function|	Cycs	Yes	No	15	M	N	M	2	0	1	MNM20	3	Yes	MMM	1	1
A_24_P181295	chr14:58598254-58598313	C14orf37	NM_001001872	Chromosome 14 open reading frame 37	cellular component|integral to membrane|IEA|GO:0016021|GOA|na//cellular component|membrane|IEA|GO:0016020|GOA|na	3632451O06Rik	No	No	14	M	N	M	2	0	1	MNM20	3	No
A_23_P101480	chr19:12985699-12985758	MAST1	NM_014975	Microtubule associated serine/threonine kinase 1	molecular function|ATP binding|ISS|GO:0005524|GOA|na//molecular function|magnesium ion binding|ISS|GO:0000287|GOA|na//molecular function|nucleotide binding|IEA|GO:0000166|GOA|na//molecular function|protein binding|IEA|GO:0005515|GOA|na//molecular function	Mast1	Yes	No	16	M	N	M	2	0	1	MNM20	3	No
A_32_P145443	chr14:77490987-77491046	C14orf4	NM_024496	Chromosome 14 open reading frame 4	molecular function|molecular_function|ND|GO:0003674|GOA|na//biological process|biological_process|ND|GO:0008150|GOA|na//cellular component|nucleus|NAS|GO:0005634|GOA|11095982	6430527G18Rik	No	No	14	M	N	M	2	2	1	MNM22	2	No
A_23_P159325	chr19:8439169-8439228	ANGPTL4	NM_139314	Angiopoietin-like 4	molecular function|enzyme inhibitor activity|ISS|GO:0004857|GOA|na//molecular function|receptor binding|IEA|GO:0005102|GOA|na//biological process|cell differentiation|IEA|GO:0030154|GOA|na//biological process|multicellular organismal development|IEA|GO:00	Angptl4	Yes	No	14	M	N	M	2	2	1	MNM22	2	No

## Sheet: Table S5C
Table S5C - 158 genes that show sex-biased expression in both human and rat liver based on criteria: |fold-change| >1.15, p<0.005 (human microarray) or p<0.05 (rat microarray). All information summarized in column N, where the first character represents the sex-bias in human liver; the 2nd character indicates the sex-bias in rat liver; 3rd and 4th digit numbers are the responses to hypophysectomy…
						Rat			Human		rat sex-biased genes' response to hypophysectomy	Response to hypophysectomy in rat	Class	Number of genes in Class	87 common sex-biased genes in human mouse and rat
Reporter Name	Chromosome Coordinate	Gene Symbol	Gene Accession	Gene Name	GO Annotation	rat symbol	same symbol between human and rat	DNA binding or Transcription	Composite array score	sex-bias		1-response 0-no response
A_23_P133236	chr5:140605528-140605587	PCDHB14	NM_018934	Protocadherin beta 14	molecular function|calcium ion binding|IEA|GO:0005509|GOA|na//molecular function|protein binding|IEA|GO:0005515|GOA|na//biological process|calcium-dependent cell-cell adhesion|NAS|GO:0016339|GOA|11322959//biological process|cell adhesion|IEA|GO:0007155|GOA|na//biological process|homophilic cell adhesion|IEA|GO:0007156|GOA|na//biological process|synapse assembly|TAS|GO:0007416|GOA|12231349//biolog…	Pcdhb20	0	No	14	F	F00	0	FF00	15	Yes
A_23_P1038	chr1:202700994-202701053	KDM5B	NM_006618	Lysine (K)-specific demethylase 5B	molecular function|DNA binding|IDA|GO:0003677|GOA|15640446//molecular function|metal ion binding|IEA|GO:0046872|GOA|na//molecular function|oxidoreductase activity|IEA|GO:0016491|GOA|na//molecular function|oxidoreductase activity, acting on single donors with incorporation of molecular oxygen, incorporation of two atoms of oxygen|IEA|GO:0016702|GOA|na//molecular function|protein binding|IEA|GO:000…	Kdm5b	1	Yes	14	F	M00	0	FM00	15	No
A_24_P224116	chr12:120759953-120760012	PLA2G1B	NM_000928	Phospholipase A2, group IB (pancreas)	molecular function|bile acid binding|ISS|GO:0032052|GOA|7060561//molecular function|calcium ion binding|IDA|GO:0005509|GOA|7060561//molecular function|calcium-dependent phospholipase A2 activity|IDA|GO:0047498|GOA|7060561//molecular function|cell surface binding|IDA|GO:0043498|GOA|1918029//molecular function|hydrolase activity|IEA|GO:0016787|GOA|na//molecular function|phospholipase A2 activity|ID…	Pla2g1b	1	Yes	15	F	M00	0	FM00	15	No
A_23_P393144	chr10:35897518-35897577	GJD4	NM_153368	Gap junction protein, delta 4, 40.1kDa	biological process|cell communication|IEA|GO:0007154|GOA|na//cellular component|cell junction|IEA|GO:0030054|GOA|na//cellular component|connexon complex|IEA|GO:0005922|GOA|na//cellular component|integral to membrane|IEA|GO:0016021|GOA|na//cellular component|plasma membrane|IEA|GO:0005886|GOA|na	Gjd4	1	No	16	M	F00	0	MF00	2	No
A_23_P127339	chr10:99433715-99433774	PI4K2A	NM_018425	Phosphatidylinositol 4-kinase type 2 alpha	molecular function|1-phosphatidylinositol 4-kinase activity|IDA|GO:0004430|GOA|11279162//molecular function|ATP binding|IEA|GO:0005524|GOA|na//molecular function|kinase activity|IEA|GO:0016301|GOA|na//molecular function|magnesium ion binding|NAS|GO:0000287|GOA|11279162//molecular function|nucleotide binding|IEA|GO:0000166|GOA|na//molecular function|protein complex binding|IEA|GO:0032403|GOA|na//m…	Pi4k2a	1	No	14	F	M00	0	FM00	15	No
A_23_P203773	chr11:27370980-27371039	CCDC34	NM_080654	Coiled-coil domain containing 34	0	Ccdc34	1	No	14	F	M00	0	FM00	15	No
A_24_P255218	chr15:52643463-52643522	MYO5A	NM_001142495	Myosin VA (heavy chain 12, myoxin)	molecular function|ATP binding|IEA|GO:0005524|GOA|na//molecular function|actin filament binding|IEA|GO:0051015|GOA|na//molecular function|calmodulin binding|IEA|GO:0005516|GOA|na//molecular function|microfilament motor activity|NAS|GO:0000146|GOA|10448864//molecular function|nucleotide binding|IEA|GO:0000166|GOA|na//biological process|actin filament-based movement|NAS|GO:0030048|GOA|10448864//bio…	Myo5a	1	No	15	F	F00	0	FF00	15	No
A_23_P146865	chr16:27232880-27232939	JMJD5	NM_024773	Jumonji domain containing 5	molecular function|molecular_function|ND|GO:0003674|GOA|na//biological process|biological_process|ND|GO:0008150|GOA|na//cellular component|cellular_component|ND|GO:0005575|GOA|na	Jmjd5	1	No	14	F	F00	0	FF00	15	No
A_32_P201521	chr17:26653738-26653797	TMEM97	NM_014573	Transmembrane protein 97	molecular function|molecular_function|ND|GO:0003674|GOA|na//biological process|regulation of cell growth|NAS|GO:0001558|GOA|7694637//cellular component|cellular_component|ND|GO:0005575|GOA|na//cellular component|integral to membrane|IEA|GO:0016021|GOA|na//cellular component|membrane|IEA|GO:0016020|GOA|na	Tmem97	1	No	15	F	M00	0	FM00	15	No
A_23_P141606	chr17:28575348-28575407	BLMH	NM_000386	Bleomycin hydrolase	molecular function|aminopeptidase activity|TAS|GO:0004177|GOA|9546396//molecular function|carboxypeptidase activity|TAS|GO:0004180|GOA|9546396//molecular function|cysteine-type endopeptidase activity|IEA|GO:0004197|GOA|na//molecular function|cysteine-type peptidase activity|TAS|GO:0008234|GOA|8639621//molecular function|peptidase activity|IEA|GO:0008233|GOA|na//molecular function|protein binding|…	Blmh	1	No	16	M	M00	0	MM00	4	No
A_24_P111061	chr21:35140021-35140080	ITSN1	NM_003024	Intersectin 1 (SH3 domain protein)	molecular function|Rho guanyl-nucleotide exchange factor activity|IEA|GO:0005089|GOA|na//molecular function|calcium ion binding|NAS|GO:0005509|GOA|9799604//molecular function|guanyl-nucleotide exchange factor activity|EXP|GO:0005085|GOA|11756498//molecular function|guanyl-nucleotide exchange factor activity|NAS|GO:0005085|GOA|9799604//molecular function|protein binding|IPI|GO:0005515|GOA|ARRAY(0x…	Itsn1	1	No	16	F	M00	0	FM00	15	No
A_23_P147098	chr7:135635346-135635392	MTPN	NM_145808	Myotrophin	molecular function|protein binding|IPI|GO:0005515|GOA|17353931//biological process|catecholamine metabolic process|IEA|GO:0006584|GOA|na//biological process|cell growth|NAS|GO:0016049|GOA|12031792//biological process|cerebellar granule cell differentiation|IEA|GO:0021707|GOA|na//biological process|neuron differentiation|NAS|GO:0030182|GOA|12031792//biological process|regulation of striated muscle…	Mtpn	1	No	14	F	M00	0	FM00	15	No
A_23_P170888	chr7:154684967-154685026	DPP6	NM_130797	Dipeptidyl-peptidase 6	molecular function|dipeptidyl-peptidase activity|TAS|GO:0008239|GOA|8103397//biological process|cell death|IEA|GO:0008219|GOA|na//biological process|proteolysis|IEA|GO:0006508|GOA|na//cellular component|integral to membrane|IEA|GO:0016021|GOA|na//cellular component|membrane|IEA|GO:0016020|GOA|na	Dpp6	1	No	15	F	M00	0	FM00	15	No
A_23_P215341	chr7:30053821-30053880	FKBP14	NM_017946	FK506 binding protein 14, 22 kDa	molecular function|calcium ion binding|IEA|GO:0005509|GOA|na//molecular function|isomerase activity|IEA|GO:0016853|GOA|na//molecular function|peptidyl-prolyl cis-trans isomerase activity|IEA|GO:0003755|GOA|na//biological process|protein folding|IEA|GO:0006457|GOA|na//cellular component|endoplasmic reticulum|IEA|GO:0005783|GOA|na//cellular component|endoplasmic reticulum lumen|IEA|GO:0005788|GOA|na	Fkbp14	1	No	14	F	F00	0	FF00	15	No
A_23_P93912	chr7:92017155-92017304	ANKIB1	NM_019004	Ankyrin repeat and IBR domain containing 1	molecular function|metal ion binding|IEA|GO:0046872|GOA|na//molecular function|protein binding|IEA|GO:0005515|GOA|na//molecular function|zinc ion binding|IEA|GO:0008270|GOA|na	Ankib1	1	No	16	F	M00	0	FM00	15	No
A_32_P32463	chr8:26435599-26435658	DPYSL2	NM_001386	Dihydropyrimidinase-like 2	molecular function|dihydropyrimidinase activity|TAS|GO:0004157|GOA|8973361//molecular function|hydrolase activity, acting on carbon-nitrogen (but not peptide) bonds|IEA|GO:0016810|GOA|na//molecular function|protein binding|IPI|GO:0005515|GOA|16260607//biological process|cell differentiation|IEA|GO:0030154|GOA|na//biological process|multicellular organismal development|IEA|GO:0007275|GOA|na//biolo…	Dpysl2	1	No	14	F	F00	0	FF00	15	No
A_23_P73571	chrX:105452546-105452605	MUM1L1	NM_152423	Melanoma associated antigen (mutated) 1-like 1	0	Mum1l1	1	No	15	F	F00	0	FF00	15	No
A_32_P213306	chr4:39458092-39458151	RPL9	NM_001024921	Ribosomal protein L9	molecular function|RNA binding|TAS|GO:0003723|GOA|8597601//molecular function|rRNA binding|IEA|GO:0019843|GOA|na//molecular function|structural constituent of ribosome|IEA|GO:0003735|GOA|na//biological process|translation|TAS|GO:0006412|GOA|8597601//biological process|translational elongation|EXP|GO:0006414|GOA|15189156//cellular component|cytoplasm|IDA|GO:0005737|GOA|18029348//cellular component…	Rpl9	1	No	14	M	F00	0	MF00	2	No
A_23_P317654	chrX:41206112-41206171	DDX3X	NM_001356	DEAD (Asp-Glu-Ala-Asp) box polypeptide 3, X-linked	molecular function|ATP binding|IEA|GO:0005524|GOA|na//molecular function|ATP-dependent RNA helicase activity|TAS|GO:0004004|GOA|9381176//molecular function|DNA binding|IEA|GO:0003677|GOA|na//molecular function|RNA binding|IEA|GO:0003723|GOA|na//molecular function|helicase activity|IEA|GO:0004386|GOA|na//molecular function|hydrolase activity|IEA|GO:0016787|GOA|na//molecular function|nucleotide bin…	Ddx3x	1	Yes	15	F	M00	0	FM00	15	Yes
A_23_P62953	chr1:164781270-164781329	PBX1	NM_002585	Pre-B-cell leukemia homeobox 1	molecular function|DNA binding|IDA|GO:0003677|GOA|10052460//molecular function|protein binding|IPI|GO:0005515|GOA|ARRAY(0x19ae984)//molecular function|protein heterodimerization activity|IEA|GO:0046982|GOA|na//molecular function|sequence-specific DNA binding|IEA|GO:0043565|GOA|na//molecular function|transcription factor activity|IEA|GO:0003700|GOA|na//biological process|adrenal gland development|…	Pbx1	1	Yes	16	M	M00	0	MM00	4	Yes
A_24_P136807	chr4:39313078-39313137	RFC1	NM_002913	Replication factor C (activator 1) 1, 145kDa	molecular function|ATP binding|IEA|GO:0005524|GOA|na//molecular function|DNA clamp loader activity|IEA|GO:0003689|GOA|na//molecular function|enzyme activator activity|TAS|GO:0008047|GOA|8954124//molecular function|nucleoside-triphosphatase activity|IEA|GO:0017111|GOA|na//molecular function|nucleotide binding|IEA|GO:0000166|GOA|na//molecular function|protein binding|IPI|GO:0005515|GOA|ARRAY(0xc53f…	Rfc1	1	Yes	15	F	M00	0	FM00	15	Yes
A_23_P216307	chr8:92972251-92972310	RUNX1T1	NM_175636	Runt-related transcription factor 1; translocated to, 1 (cyclin D-related)	molecular function|metal ion binding|IEA|GO:0046872|GOA|na//molecular function|protein binding|IPI|GO:0005515|GOA|ARRAY(0xe1a444)//molecular function|protein homodimerization activity|IEA|GO:0042803|GOA|na//molecular function|transcription factor activity|IEA|GO:0003700|GOA|na//molecular function|transcription repressor activity|IEA|GO:0016564|GOA|na//molecular function|zinc ion binding|IEA|GO:00…	Runx1t1	1	Yes	15	F	F00	0	FF00	15	Yes
A_24_P736006	chr1:171168486-171168545	FMO2	NM_001460	Flavin containing monooxygenase 2 (non-functional)	molecular function|FAD binding|IEA|GO:0050660|GOA|na//molecular function|NADP or NADPH binding|IEA|GO:0050661|GOA|na//molecular function|flavin-containing monooxygenase activity|IDA|GO:0004499|GOA|11744609//molecular function|monooxygenase activity|EXP|GO:0004497|GOA|11744609//biological process|NADP metabolic process|IDA|GO:0006739|GOA|11744609//biological process|drug metabolic process|IDA|GO:0…	Fmo2	1	No	15	F	F00	0	FF00	15	Yes
A_24_P273583	chr1:9330937-9330996	H6PD	NM_004285	Hexose-6-phosphate dehydrogenase (glucose 1-dehydrogenase)	molecular function|6-phosphogluconolactonase activity|IEA|GO:0017057|GOA|na//molecular function|binding|IEA|GO:0005488|GOA|na//molecular function|glucose 1-dehydrogenase activity|IEA|GO:0047936|GOA|na//molecular function|glucose-6-phosphate dehydrogenase activity|IEA|GO:0004345|GOA|na//molecular function|hydrolase activity|IEA|GO:0016787|GOA|na//molecular function|oxidoreductase activity|IEA|GO:0…	H6pd	1	No	16	M	M00	0	MM00	4	Yes
A_24_P249784	chr12:1600127-1600186	ERC1	NR_027949	0	0	Erc1	1	No	15	F	M00	0	FM00	15	Yes
A_24_P364412	chr12:80190702-80191005	PPP1R12A	NM_002480	Protein phosphatase 1, regulatory (inhibitor) subunit 12A	molecular function|phosphoprotein phosphatase activity|IEA|GO:0004721|GOA|na//molecular function|protein binding|IPI|GO:0005515|GOA|ARRAY(0x2e94d70)//molecular function|signal transducer activity|NAS|GO:0004871|GOA|8662509//cellular component|cytoplasm|IEA|GO:0005737|GOA|na	Ppp1r12a	1	No	14	F	F00	0	FF00	15	Yes
A_23_P65357	chr14:70839223-70839282	SYNJ2BP	NM_018373	Synaptojanin 2 binding protein	molecular function|protein binding|IEA|GO:0005515|GOA|na//cellular component|integral to membrane|IEA|GO:0016021|GOA|na//cellular component|membrane|IEA|GO:0016020|GOA|na//cellular component|mitochondrial outer membrane|IEA|GO:0005741|GOA|na//cellular component|mitochondrion|IDA|GO:0005739|GOA|18029348	Synj2bp	1	No	14	F	M00	0	FM00	15	Yes
A_23_P118185	chr16:48385610-48385669	LONP2	NM_031490	Lon peptidase 2, peroxisomal	molecular function|ATP binding|IEA|GO:0005524|GOA|na//molecular function|ATP-dependent peptidase activity|IEA|GO:0004176|GOA|na//molecular function|enzyme binding|IPI|GO:0019899|GOA|18281296//molecular function|nucleoside-triphosphatase activity|IEA|GO:0017111|GOA|na//molecular function|nucleotide binding|IEA|GO:0000166|GOA|na//molecular function|peptidase activity|IDA|GO:0008233|GOA|18281296//mo…	Lonp2	1	No	14	F	M00	0	FM00	15	Yes
A_23_P90510	chr19:1497806-1497865	REEP6	NM_138393	Receptor accessory protein 6	cellular component|integral to membrane|IEA|GO:0016021|GOA|na//cellular component|membrane|IEA|GO:0016020|GOA|na	Reep6	1	No	14	F	F00	0	FF00	15	Yes
A_23_P253301	chr3:149683335-149683394	PFN2	NM_053024	Profilin 2	molecular function|actin binding|NAS|GO:0003779|GOA|na//molecular function|phosphatidylinositol-4,5-bisphosphate binding|NAS|GO:0005546|GOA|na//molecular function|protein binding|IPI|GO:0005515|GOA|ARRAY(0x12fa2ec)//biological process|actin cytoskeleton organization|IEA|GO:0030036|GOA|na//biological process|regulation of actin polymerization or depolymerization|NAS|GO:0008064|GOA|na//cellular com…	Pfn2	1	No	14	F	F00	0	FF00	15	Yes
A_24_P165949	chr3:190027965-190028024	CLDN1	NM_021101	Claudin 1	molecular function|PDZ domain binding|IEA|GO:0030165|GOA|na//molecular function|identical protein binding|ISS|GO:0042802|GOA|na//molecular function|structural molecule activity|IEA|GO:0005198|GOA|na//biological process|calcium-independent cell-cell adhesion|ISS|GO:0016338|GOA|na//biological process|cell adhesion|TAS|GO:0007155|GOA|9647647//biological process|interspecies interaction between organ…	Cldn1	1	No	15	F	F00	0	FF00	15	Yes
A_24_P83379	chr4:85730135-85730194	WDFY3	NM_178583	WD repeat and FYVE domain containing 3	molecular function|beta-N-acetylglucosaminylglycopeptide beta-1,4-galactosyltransferase activity|IEA|GO:0003831|GOA|na//molecular function|binding|IEA|GO:0005488|GOA|na//molecular function|metal ion binding|IEA|GO:0046872|GOA|na//molecular function|phosphatidylinositol binding|IDA|GO:0005545|GOA|15292400//molecular function|zinc ion binding|IEA|GO:0008270|GOA|na//cellular component|autophagic vac…	Wdfy3	1	No	14	F	F00	0	FF00	15	Yes
A_23_P323930	chr4:99393408-99393467	TSPAN5	NM_005723	Tetraspanin 5	cellular component|integral to membrane|IEA|GO:0016021|GOA|na//cellular component|membrane|IEA|GO:0016020|GOA|na	Tspan5	1	No	15	F	F00	0	FF00	15	Yes
A_24_P393658	chr6:83877201-83877260	PGM3	AL117443	Phosphoglucomutase 3	molecular function|isomerase activity|IEA|GO:0016853|GOA|na//molecular function|magnesium ion binding|IEA|GO:0000287|GOA|na//molecular function|phosphoacetylglucosamine mutase activity|IDA|GO:0004610|GOA|11004509//molecular function|phosphoglucomutase activity|IEA|GO:0004614|GOA|na//biological process|UDP-N-acetylglucosamine biosynthetic process|IEA|GO:0006048|GOA|na//biological process|carbohydr…	Pgm3	1	No	15	M	M00	0	MM00	4	Yes
A_23_P133691	chr6:90087390-90087437	RRAGD	NM_021244	Ras-related GTP binding D	molecular function|GTP binding|IEA|GO:0005525|GOA|na//molecular function|nucleotide binding|IEA|GO:0000166|GOA|na//molecular function|protein binding|IPI|GO:0005515|GOA|ARRAY(0x199087c)//molecular function|protein heterodimerization activity|IPI|GO:0046982|GOA|11073942//cellular component|cytoplasm|IDA|GO:0005737|GOA|11073942//cellular component|nucleus|IDA|GO:0005634|GOA|11073942	Rragd	1	No	15	F	F00	0	FF00	15	Yes
A_24_P32887	chr9:136901175-136901234	BRD3	NM_007371	Bromodomain containing 3	molecular function|molecular_function|ND|GO:0003674|GOA|na//biological process|biological_process|ND|GO:0008150|GOA|na//cellular component|nucleus|NAS|GO:0005634|GOA|na	Brd3	1	No	15	F	M00	0	FM00	15	Yes
A_23_P82523	chr7:87135313-87135359	ABCB1	NM_000927	ATP-binding cassette, sub-family B (MDR/TAP), member 1	molecular function|ATP binding|IEA|GO:0005524|GOA|na//molecular function|ATPase activity|IEA|GO:0016887|GOA|na//molecular function|ATPase activity, coupled to transmembrane movement of substances|TAS|GO:0042626|GOA|3022150//molecular function|hydrolase activity|IEA|GO:0016787|GOA|na//molecular function|nucleotide binding|IEA|GO:0000166|GOA|na//molecular function|protein binding|IPI|GO:0005515|GOA…	Abcb1a	0	No	15	M	F02	1	MF02	6	Yes
A_24_P237389	chrX:20142959-20143018	EIF1AX	NM_001412	Eukaryotic translation initiation factor 1A, X-linked	molecular function|RNA binding|IEA|GO:0003723|GOA|na//molecular function|translation factor activity, nucleic acid binding|TAS|GO:0008135|GOA|8106356//molecular function|translation initiation factor activity|IEA|GO:0003743|GOA|na//biological process|translational initiation|IEA|GO:0006413|GOA|na//cellular component|cytoplasm|IDA|GO:0005737|GOA|18029348//cellular component|cytosol|EXP|GO:0005829|…	Eif1a	0	No	16	F	M20	1	FM20	13	Yes
A_24_P185709	chr20:34820431-34820490	EPB41L1	NM_177996	Erythrocyte membrane protein band 4.1-like 1	molecular function|actin binding|IEA|GO:0003779|GOA|na//molecular function|binding|IEA|GO:0005488|GOA|na//molecular function|structural molecule activity|IEA|GO:0005198|GOA|na//biological process|cortical actin cytoskeleton organization|IEA|GO:0030866|GOA|na//cellular component|cytoplasm|IEA|GO:0005737|GOA|na//cellular component|cytoskeleton|IEA|GO:0005856|GOA|na//cellular component|cytosol|EXP|G…	Epb4.1l1	0	No	14	F	M01	1	FM01	16	Yes
A_24_P196298	chr11:118354935-118354994	MLL	NM_005933	Myeloid/lymphoid or mixed-lineage leukemia (trithorax homolog, Drosophila)	molecular function|AT DNA binding|NAS|GO:0003680|GOA|1423624//molecular function|RNA polymerase II transcription factor activity|TAS|GO:0003702|GOA|10821850//molecular function|chromatin binding|IEA|GO:0003682|GOA|na//molecular function|histone acetyl-lysine binding|IDA|GO:0070577|GOA|19187761//molecular function|histone methyltransferase activity (H3-K4 specific)|IDA|GO:0042800|GOA|ARRAY(0xf4a99…	Mll1	0	Yes	14	F	M01	1	FM01	16	Yes
A_24_P128041	chrX:76953070-76953105	ATRX	NM_138270	Alpha thalassemia/mental retardation syndrome X-linked (RAD54 homolog, S. cerevisiae)	molecular function|ATP binding|IEA|GO:0005524|GOA|na//molecular function|DNA binding|IEA|GO:0003677|GOA|na//molecular function|DNA helicase activity|TAS|GO:0003678|GOA|7697714//molecular function|chromatin binding|IEA|GO:0003682|GOA|na//molecular function|chromo shadow domain binding|IPI|GO:0070087|GOA|15882967//molecular function|helicase activity|TAS|GO:0004386|GOA|7874112//molecular function|h…	Atrx	1	Yes	15	F	M22	1	FM22	5	No
A_23_P96144	chr2:203424632-203424691	BMPR2	NM_001204	Bone morphogenetic protein receptor, type II (serine/threonine kinase)	molecular function|ATP binding|IEA|GO:0005524|GOA|na//molecular function|growth factor binding|IEA|GO:0019838|GOA|na//molecular function|metal ion binding|IEA|GO:0046872|GOA|na//molecular function|nucleotide binding|IEA|GO:0000166|GOA|na//molecular function|protein binding|IPI|GO:0005515|GOA|ARRAY(0x1d5c388)//molecular function|protein serine/threonine kinase activity|IEA|GO:0004674|GOA|na//molec…	Bmpr2	1	Yes	15	F	M01	1	FM01	16	No
A_23_P214969	chr6:139693592-139693651	CITED2	NM_006079	Cbp/p300-interacting transactivator, with Glu/Asp-rich carboxy-terminal domain, 2	molecular function|LBD domain binding|IPI|GO:0050693|GOA|15051727//molecular function|protein binding|IPI|GO:0005515|GOA|ARRAY(0x1543220)//molecular function|transcription activator activity|IDA|GO:0016563|GOA|ARRAY(0x11fcfec)//molecular function|transcription coactivator activity|IDA|GO:0003713|GOA|15051727//molecular function|transcription corepressor activity|IMP|GO:0003714|GOA|17906695//molec…	Cited2	1	Yes	15	F	M01	1	FM01	16	No
A_23_P134366	chr7:13935455-13935514	ETV1	NM_004956	Ets variant 1	molecular function|sequence-specific DNA binding|IEA|GO:0043565|GOA|na//molecular function|transcription factor activity|IEA|GO:0003700|GOA|na//biological process|regulation of transcription, DNA-dependent|IEA|GO:0006355|GOA|na//biological process|transcription from RNA polymerase II promoter|TAS|GO:0006366|GOA|7700648//cellular component|nucleus|IEA|GO:0005634|GOA|na	Etv1	1	Yes	15	F	F11	1	FF11	6	No
A_23_P110531	chr5:52780837-52780896	FST	NM_013409	Follistatin	molecular function|activin binding|IPI|GO:0048185|GOA|12697670//molecular function|heparan sulfate proteoglycan binding|IEA|GO:0043395|GOA|na//molecular function|protein binding|IPI|GO:0005515|GOA|ARRAY(0x180496c)//molecular function|signal transducer activity|NAS|GO:0004871|GOA|12702211//biological process|BMP signaling pathway|IEA|GO:0030509|GOA|na//biological process|female gonad development|I…	Fst	1	Yes	14	F	M11	1	FM11	11	No
A_32_P120851	chr5:150408035-150408094	GPX3	NM_002084	Glutathione peroxidase 3 (plasma)	molecular function|glutathione binding|IEA|GO:0043295|GOA|na//molecular function|glutathione peroxidase activity|IDA|GO:0004602|GOA|ARRAY(0xc1b780)//molecular function|oxidoreductase activity|IEA|GO:0016491|GOA|na//molecular function|selenium binding|IDA|GO:0008430|GOA|ARRAY(0x153e990)//molecular function|transcription factor binding|TAS|GO:0008134|GOA|8056346//biological process|glutathione meta…	Gpx3	1	Yes	15	M	F22	1	MF22	4	No
A_24_P350969	chr17:2293179-2293238	MNT	AK001561	MAX binding protein	molecular function|transcription coactivator activity|TAS|GO:0003713|GOA|9598315//molecular function|transcription corepressor activity|TAS|GO:0003714|GOA|9598315//molecular function|transcription factor activity|IEA|GO:0003700|GOA|na//biological process|cell aging|IEA|GO:0007569|GOA|na//biological process|multicellular organismal development|TAS|GO:0007275|GOA|9184233//biological process|negativ…	Mnt	1	Yes	14	M	F22	1	MF22	4	No
A_24_P313354	chr15:96877802-96880605	NR2F2	NM_021005	Nuclear receptor subfamily 2, group F, member 2	molecular function|ligand-dependent nuclear receptor activity|TAS|GO:0004879|GOA|1899293//molecular function|ligand-regulated transcription factor activity|TAS|GO:0003706|GOA|8530078//molecular function|metal ion binding|IEA|GO:0046872|GOA|na//molecular function|promoter binding|IDA|GO:0010843|GOA|19210544//molecular function|protein binding|IPI|GO:0005515|GOA|ARRAY(0xf9fc44)//molecular function|…	Nr2f2	1	Yes	14	F	M01	1	FM01	16	No
A_23_P340717	chr15:53049751-53049810	ONECUT1	NM_004498	One cut homeobox 1	molecular function|sequence-specific DNA binding|IEA|GO:0043565|GOA|na//molecular function|transcription activator activity|NAS|GO:0016563|GOA|na//molecular function|transcription factor activity|IEA|GO:0003700|GOA|na//biological process|B cell differentiation|IEA|GO:0030183|GOA|na//biological process|anatomical structure morphogenesis|IEA|GO:0009653|GOA|na//biological process|cell fate commitmen…	Onecut1	1	Yes	14	F	F22	1	FF22	9	No
A_23_P211643	chr22:46615754-46615813	PPARA	NM_005036	Peroxisome proliferator-activated receptor alpha	molecular function|DNA binding|TAS|GO:0003677|GOA|10860941//molecular function|drug binding|IDA|GO:0008144|GOA|ARRAY(0xbd03c4)//molecular function|ligand-dependent nuclear receptor activity|IDA|GO:0004879|GOA|12955147//molecular function|ligand-regulated transcription factor activity|IEA|GO:0003706|GOA|na//molecular function|lipid binding|IDA|GO:0008289|GOA|12955147//molecular function|metal ion …	Ppara	1	Yes	16	F	M11	1	FM11	11	No
A_24_P22887	chr19:13059341-13059533	RAD23A	NM_005053	RAD23 homolog A (S. cerevisiae)	molecular function|damaged DNA binding|IEA|GO:0003684|GOA|na//molecular function|protein binding|IPI|GO:0005515|GOA|16189514//molecular function|single-stranded DNA binding|TAS|GO:0003697|GOA|8168482//biological process|interspecies interaction between organisms|IEA|GO:0044419|GOA|na//biological process|nucleotide-excision repair|IEA|GO:0006289|GOA|na//biological process|proteasomal ubiquitin-dep…	Rad23a	1	Yes	14	F	F10	1	FF10	9	No
A_23_P18205	chr3:51697368-51697427	RAD54L2	NM_015106	RAD54-like 2 (S. cerevisiae)	molecular function|ATP binding|IEA|GO:0005524|GOA|na//molecular function|DNA binding|IEA|GO:0003677|GOA|na//molecular function|helicase activity|IEA|GO:0004386|GOA|na//molecular function|hydrolase activity|IEA|GO:0016787|GOA|na//molecular function|nucleotide binding|IEA|GO:0000166|GOA|na//molecular function|protein kinase binding|IEA|GO:0019901|GOA|na//molecular function|transcription cofactor ac…	Rad54l2	1	Yes	14	M	M20	1	MM20	6	No
A_24_P96403	chr21:36160391-36160450	RUNX1	NM_001754	Runt-related transcription factor 1	molecular function|ATP binding|NAS|GO:0005524|GOA|na//molecular function|DNA binding|NAS|GO:0003677|GOA|na//molecular function|protein binding|IPI|GO:0005515|GOA|ARRAY(0xe38c20)//molecular function|transcription activator activity|IDA|GO:0016563|GOA|ARRAY(0x1d95414)//molecular function|transcription factor activity|IEA|GO:0003700|GOA|na//biological process|multicellular organismal development|TAS…	Runx1	1	Yes	15	M	F10	1	MF10	6	No
A_24_P114459	chr3:72428428-72428487	RYBP	NM_012234	RING1 and YY1 binding protein	molecular function|DNA binding|IEA|GO:0003677|GOA|na//molecular function|metal ion binding|IEA|GO:0046872|GOA|na//molecular function|protein binding|IEA|GO:0005515|GOA|na//molecular function|transcription corepressor activity|IEA|GO:0003714|GOA|na//molecular function|zinc ion binding|IEA|GO:0008270|GOA|na//biological process|apoptosis|IEA|GO:0006915|GOA|na//biological process|multicellular organi…	Rybp	1	Yes	16	F	M01	1	FM01	16	No
A_23_P57989	chr3:176742818-176742877	TBL1XR1	NM_024665	Transducin (beta)-like 1 X-linked receptor 1	molecular function|DNA binding|IEA|GO:0003677|GOA|na//molecular function|beta-catenin binding|IPI|GO:0008013|GOA|18193033//molecular function|histone binding|IDA|GO:0042393|GOA|15601853//molecular function|promoter binding|IDA|GO:0010843|GOA|18193033//molecular function|promoter binding|ISS|GO:0010843|GOA|na//molecular function|protein N-terminus binding|IPI|GO:0047485|GOA|16893456//molecular fun…	Tbl1xr1	1	Yes	16	F	M01	1	FM01	16	No
A_24_P238402	chr1:91406349-91406408	ZNF644	NM_201269	Zinc finger protein 644	molecular function|DNA binding|IEA|GO:0003677|GOA|na//molecular function|metal ion binding|IEA|GO:0046872|GOA|na//molecular function|zinc ion binding|IEA|GO:0008270|GOA|na//biological process|regulation of transcription|IEA|GO:0045449|GOA|na//cellular component|intracellular|IEA|GO:0005622|GOA|na//cellular component|nucleus|IEA|GO:0005634|GOA|na	Znf644	1	Yes	15	F	F10	1	FF10	9	No
A_24_P911179	chr1:197113124-197113183	ASPM	NM_018136	Asp (abnormal spindle) homolog, microcephaly associated (Drosophila)	molecular function|calmodulin binding|IEA|GO:0005516|GOA|na//biological process|cell cycle|IEA|GO:0007049|GOA|na//biological process|cell division|IEA|GO:0051301|GOA|na//biological process|forebrain neuroblast division|IEA|GO:0021873|GOA|na//biological process|maintenance of centrosome location|IEA|GO:0051661|GOA|na//biological process|mitosis|IEA|GO:0007067|GOA|na//biological process|negative re…	Aspm	1	No	14	F	M20	1	FM20	13	No
A_23_P86012	chr1:209788278-209788337	LAMB3	NM_001127641	Laminin, beta 3	molecular function|protein binding|IPI|GO:0005515|GOA|19275936//molecular function|protein complex binding|IEA|GO:0032403|GOA|na//molecular function|structural molecule activity|NAS|GO:0005198|GOA|7550320//biological process|brown fat cell differentiation|IEA|GO:0050873|GOA|na//biological process|cell adhesion|IEA|GO:0007155|GOA|na//biological process|epidermis development|TAS|GO:0008544|GOA|7774…	Lamb3	1	No	14	F	M11	1	FM11	11	No
A_24_P343695	chr10:43617412-43617464	RET	NM_020975	Ret proto-oncogene	molecular function|ATP binding|IEA|GO:0005524|GOA|na//molecular function|calcium ion binding|IEA|GO:0005509|GOA|na//molecular function|nucleotide binding|IEA|GO:0000166|GOA|na//molecular function|protein binding|IEA|GO:0005515|GOA|na//molecular function|protein tyrosine kinase activity|TAS|GO:0004713|GOA|7824936//molecular function|receptor activity|TAS|GO:0004872|GOA|7824936//molecular function|…	Ret	1	No	14	F	F11	1	FF11	6	No
A_24_P107291	chr11:111612791-111612850	PPP2R1B	NM_181700	0	0	Ppp2r1b	1	No	15	M	F12	1	MF12	2	No
A_24_P195510	chrX:71495414-71495473	RPS4X	M58458	Ribosomal protein S4, X-linked	molecular function|rRNA binding|IEA|GO:0019843|GOA|na//molecular function|structural constituent of ribosome|IMP|GO:0003735|GOA|8358435//biological process|multicellular organismal development|IMP|GO:0007275|GOA|8358435//biological process|positive regulation of cell proliferation|IMP|GO:0008284|GOA|1795030//biological process|positive regulation of translation|IMP|GO:0045727|GOA|1795030//biologi…	Rps4x	1	No	16	F	F10	1	FF10	9	No
A_24_P941773	chr12:51324995-51325054	METTL7A	NM_014033	Methyltransferase like 7A	molecular function|methyltransferase activity|IEA|GO:0008168|GOA|na//molecular function|transferase activity|IEA|GO:0016740|GOA|na//biological process|metabolic process|IEA|GO:0008152|GOA|na//cellular component|endoplasmic reticulum|IEA|GO:0005783|GOA|na//cellular component|lipid particle|IEA|GO:0005811|GOA|na//cellular component|membrane|IEA|GO:0016020|GOA|na	Mettl7a	1	No	14	F	M11	1	FM11	11	No
A_23_P32707	chr12:53686748-53687109	ESPL1	NM_012291	Extra spindle pole bodies homolog 1 (S. cerevisiae)	molecular function|catalytic activity|NAS|GO:0003824|GOA|12672959//molecular function|cysteine-type peptidase activity|NAS|GO:0008234|GOA|12672959//molecular function|peptidase activity|IEA|GO:0008233|GOA|na//molecular function|protein binding|IPI|GO:0005515|GOA|ARRAY(0x12e919c)//biological process|apoptosis|TAS|GO:0006915|GOA|11875078//biological process|chromosome segregation|IEA|GO:0007059|GOA…	Espl1	1	No	16	F	M22	1	FM22	5	No
A_23_P139682	chr12:9304816-9304850	PZP	NM_002864	Pregnancy-zone protein	molecular function|endopeptidase inhibitor activity|TAS|GO:0004866|GOA|2476433//molecular function|protein binding|IEA|GO:0005515|GOA|na//molecular function|serine-type endopeptidase inhibitor activity|IEA|GO:0004867|GOA|na//biological process|female pregnancy|TAS|GO:0007565|GOA|2692707//cellular component|extracellular region|NAS|GO:0005576|GOA|14718574//cellular component|extracellular space|IE…	Pzp	1	No	16	F	M01	1	FM01	16	No
A_23_P421423	chr14:103603617-103603676	TNFAIP2	NM_006291	Tumor necrosis factor, alpha-induced protein 2	biological process|angiogenesis|IEA|GO:0001525|GOA|na//biological process|cell differentiation|IEA|GO:0030154|GOA|na//biological process|multicellular organismal development|IEA|GO:0007275|GOA|na//cellular component|extracellular space|TAS|GO:0005615|GOA|1374453	Tnfaip2	1	No	15	M	M01	1	MM01	5	No
A_23_P3038	chr14:65406396-65406455	GPX2	NM_002083	Glutathione peroxidase 2 (gastrointestinal)	molecular function|electron carrier activity|TAS|GO:0009055|GOA|8428933//molecular function|glutathione peroxidase activity|IEA|GO:0004602|GOA|na//molecular function|oxidoreductase activity|IEA|GO:0016491|GOA|na//biological process|interaction with symbiont|IEA|GO:0051702|GOA|na//biological process|negative regulation of inflammatory response to antigenic stimulus|IEA|GO:0002862|GOA|na//biologica…	Gpx2	1	No	14	M	F02	1	MF02	6	No
A_24_P367776	chr16:20430976-20431035	ACSM5	BC016703	Acyl-CoA synthetase medium-chain family member 5	molecular function|ATP binding|IEA|GO:0005524|GOA|na//molecular function|GTP binding|IEA|GO:0005525|GOA|na//molecular function|butyrate-CoA ligase activity|IEA|GO:0047760|GOA|na//molecular function|ligase activity|IEA|GO:0016874|GOA|na//molecular function|metal ion binding|IEA|GO:0046872|GOA|na//molecular function|nucleotide binding|IEA|GO:0000166|GOA|na//biological process|fatty acid metabolic p…	Acsm5	1	No	15	F	F11	1	FF11	6	No
A_23_P207837	chr17:28793063-28793122	CPD	NM_001304	Carboxypeptidase D	molecular function|metal ion binding|IEA|GO:0046872|GOA|na//molecular function|metallocarboxypeptidase activity|IEA|GO:0004181|GOA|na//molecular function|metallopeptidase activity|IEA|GO:0008237|GOA|na//molecular function|peptidase activity|IEA|GO:0008233|GOA|na//molecular function|serine-type carboxypeptidase activity|IEA|GO:0004185|GOA|na//molecular function|zinc ion binding|IEA|GO:0008270|GOA|…	Cpd	1	No	16	M	M20	1	MM20	6	No
A_24_P32151	chr17:293237-293287	FAM101B	NM_182705	Family with sequence similarity 101, member B	0	Fam101b	1	No	14	F	F01	1	FF01	2	No
A_23_P218331	chr17:61510628-61510687	CYB561	NM_001915	Cytochrome b-561	molecular function|cytochrome-b5 reductase activity|TAS|GO:0004128|GOA|7980462//molecular function|ferric-chelate reductase activity|ISS|GO:0000293|GOA|14499595//molecular function|metal ion binding|IEA|GO:0046872|GOA|na//biological process|electron transport chain|IEA|GO:0022900|GOA|na//biological process|generation of precursor metabolites and energy|TAS|GO:0006091|GOA|7559396//biological proce…	Cyb561	1	No	14	F	M01	1	FM01	16	No
A_23_P27450	chr19:45448104-45448412	APOC4	NM_001646	Apolipoprotein C-IV	molecular function|lipid transporter activity|TAS|GO:0005319|GOA|8530039//biological process|lipid metabolic process|TAS|GO:0006629|GOA|8530039//biological process|lipid transport|IEA|GO:0006869|GOA|na//biological process|positive regulation of sequestering of triglyceride|IMP|GO:0010890|GOA|18809223//biological process|triglyceride homeostasis|IMP|GO:0070328|GOA|8827523//cellular component|extra…	Apoc4	1	No	15	F	F02	1	FF02	9	No
A_24_P122921	chr2:111925892-111925951	BCL2L11	NM_138621	BCL2-like 11 (apoptosis facilitator)	molecular function|microtubule binding|IEA|GO:0008017|GOA|na//molecular function|protein binding|IPI|GO:0005515|GOA|ARRAY(0xcdd984)//biological process|B cell apoptosis|IEA|GO:0001783|GOA|na//biological process|B cell homeostasis|IEA|GO:0001782|GOA|na//biological process|T cell homeostasis|IEA|GO:0043029|GOA|na//biological process|activation of pro-apoptotic gene products|EXP|GO:0008633|GOA|14764…	Bcl2l11	1	No	16	M	M01	1	MM01	5	No
A_32_P116857	chr2:178489045-178489104	PDE11A	NM_016953	Phosphodiesterase 11A	molecular function|3',5'-cyclic-GMP phosphodiesterase activity|IEA|GO:0047555|GOA|na//molecular function|3',5'-cyclic-nucleotide phosphodiesterase activity|TAS|GO:0004114|GOA|10725373//molecular function|cyclic-nucleotide phosphodiesterase activity|NAS|GO:0004112|GOA|10906126//molecular function|hydrolase activity|IEA|GO:0016787|GOA|na//molecular function|metal ion binding|IEA|GO:0046872|GOA|na//…	Pde11a	1	No	16	F	M20	1	FM20	13	No
A_32_P195401	chr2:203634375-203634434	FAM117B	NM_173511	Family with sequence similarity 117, member B	0	Fam117b	1	No	16	F	M20	1	FM20	13	No
A_24_P217234	chr2:44547688-44547747	SLC3A1	NM_000341	Solute carrier family 3 (cystine, dibasic and neutral amino acid transporters, activator of cystine, dibasic and neutral amino acid transport), member 1	molecular function|L-cystine transmembrane transporter activity|TAS|GO:0015184|GOA|8054986//molecular function|amino acid transmembrane transporter activity|TAS|GO:0015171|GOA|10799513//molecular function|basic amino acid transmembrane transporter activity|TAS|GO:0015174|GOA|8054986//molecular function|catalytic activity|IEA|GO:0003824|GOA|na//molecular function|cation binding|IEA|GO:0043169|GOA|…	Slc3a1	1	No	16	F	M11	1	FM11	11	No
A_23_P95453	chr2:50147602-50147661	NRXN1	NM_138735	Neurexin 1	molecular function|metal ion binding|IEA|GO:0046872|GOA|na//molecular function|protein binding|IEA|GO:0005515|GOA|na//molecular function|protein binding|IPI|GO:0005515|GOA|11152476//molecular function|receptor activity|TAS|GO:0004872|GOA|1621094//biological process|axon guidance|TAS|GO:0007411|GOA|1621094//biological process|cell adhesion|IEA|GO:0007155|GOA|na//cellular component|integral to memb…	Nrxn1	1	No	14	F	M20	1	FM20	13	No
A_23_P68240	chr2:96687743-96687802	GPAT2	NM_207328	Glycerol-3-phosphate acyltransferase 2, mitochondrial	molecular function|acyltransferase activity|IEA|GO:0008415|GOA|na//molecular function|glycerol-3-phosphate O-acyltransferase activity|ISS|GO:0004366|GOA|na//molecular function|transferase activity|IEA|GO:0016740|GOA|na//biological process|glycerol-3-phosphate metabolic process|ISS|GO:0006072|GOA|na//biological process|metabolic process|IEA|GO:0008152|GOA|na//biological process|phospholipid biosyn…	Gpat2	1	No	15	M	M01	1	MM01	5	No
A_23_P154986	chr22:25023862-25023921	GGT1	NM_013430	Gamma-glutamyltransferase 1	molecular function|acyltransferase activity|IEA|GO:0008415|GOA|na//molecular function|gamma-glutamyltransferase activity|IEA|GO:0003840|GOA|na//molecular function|protein binding|IPI|GO:0005515|GOA|15528406//molecular function|transferase activity|IEA|GO:0016740|GOA|na//biological process|cellular amino acid metabolic process|TAS|GO:0006520|GOA|2904146//biological process|glutathione biosynthetic…	Ggt1	1	No	15	M	F22	1	MF22	4	No
A_23_P167017	chr3:119361003-119361062	POPDC2	NM_022135	Popeye domain containing 2	molecular function|molecular_function|ND|GO:0003674|GOA|na//biological process|biological_process|ND|GO:0008150|GOA|na//cellular component|integral to membrane|NAS|GO:0016021|GOA|10882522//cellular component|membrane|IEA|GO:0016020|GOA|na	Popdc2	1	No	15	M	F12	1	MF12	2	No
A_23_P170233	chr3:122060446-122060505	CSTA	NM_005213	Cystatin A (stefin A)	molecular function|cysteine-type endopeptidase inhibitor activity|IDA|GO:0004869|GOA|6203523//molecular function|protease binding|IPI|GO:0002020|GOA|6203523//molecular function|protein binding, bridging|IDA|GO:0030674|GOA|10908733//molecular function|structural molecule activity|IDA|GO:0005198|GOA|10908733//biological process|keratinocyte differentiation|IDA|GO:0030216|GOA|10908733//biological pr…	Csta	1	No	16	M	M20	1	MM20	6	No
A_23_P92562	chr4:100333763-100333822	ADH7	NM_001166504	Alcohol dehydrogenase 7 (class IV), mu or sigma polypeptide	molecular function|alcohol dehydrogenase (NAD) activity|TAS|GO:0004022|GOA|8074657//molecular function|alcohol dehydrogenase activity, zinc-dependent|IDA|GO:0004024|GOA|7876099//molecular function|aldehyde oxidase activity|IDA|GO:0004031|GOA|9600267//molecular function|binding|IEA|GO:0005488|GOA|na//molecular function|ethanol binding|IDA|GO:0035276|GOA|9228021//molecular function|metal ion bindin…	Adh7	1	No	15	F	F12	1	FF12	4	No
A_24_P388622	chr4:4458978-4459202	STX18	NM_016930	Syntaxin 18	molecular function|SNAP receptor activity|IEA|GO:0005484|GOA|na//molecular function|protein binding|IPI|GO:0005515|GOA|ARRAY(0x490de9c)//biological process|ER to Golgi vesicle-mediated transport|TAS|GO:0006888|GOA|10788491//biological process|intracellular protein transport|IEA|GO:0006886|GOA|na//biological process|vesicle-mediated transport|IEA|GO:0016192|GOA|na//cellular component|Golgi apparat…	Stx18	1	No	16	F	M20	1	FM20	13	No
A_23_P110412	chr4:83405786-83405845	TMEM150C	NM_001080506	Transmembrane protein 150C	0	Tmem150c	1	No	15	F	M01	1	FM01	16	No
A_32_P109653	chr4:90645327-90645386	SNCA	NM_007308	Synuclein, alpha (non A4 component of amyloid precursor)	molecular function|Hsp70 protein binding|IPI|GO:0030544|GOA|18975920//molecular function|alpha-tubulin binding|IPI|GO:0043014|GOA|11698390//molecular function|arachidonic acid binding|IEA|GO:0050544|GOA|na//molecular function|calcium ion binding|IDA|GO:0005509|GOA|ARRAY(0x42358c4)//molecular function|caspase inhibitor activity|IDA|GO:0043027|GOA|10818098//molecular function|dynein binding|IPI|GO:…	Snca	1	No	14	F	M22	1	FM22	5	No
A_24_P334378	chr4:69794649-69794708	UGT2A3	NR_024010	0	0	Ugt2a3	1	No	15	F	F22	1	FF22	9	No
A_23_P348159	chr6:56468851-56468910	DST	NM_020388	Dystonin	molecular function|actin binding|IEA|GO:0003779|GOA|na//molecular function|calcium ion binding|IEA|GO:0005509|GOA|na//molecular function|integrin binding|IPI|GO:0005178|GOA|11375975//molecular function|protein C-terminus binding|IPI|GO:0008022|GOA|11375975//molecular function|protein binding|IEA|GO:0005515|GOA|na//molecular function|protein binding|IPI|GO:0005515|GOA|ARRAY(0x14a7b10)//biological …	Dst	1	No	16	F	F10	1	FF10	9	No
A_23_P255663	chr6:96056776-96056835	MANEA	NM_024641	Mannosidase, endo-alpha	molecular function|glycoprotein endo-alpha-1,2-mannosidase activity|IEA|GO:0004569|GOA|na//molecular function|hydrolase activity|IEA|GO:0016787|GOA|na//cellular component|Golgi apparatus|IDA|GO:0005794|GOA|18029348//cellular component|Golgi membrane|IEA|GO:0000139|GOA|na//cellular component|integral to membrane|IEA|GO:0016021|GOA|na//cellular component|membrane|IEA|GO:0016020|GOA|na	Manea	1	No	15	M	M22	1	MM22	4	No
A_24_P129341	chr7:134225799-134225858	AKR1B10	NM_020299	Aldo-keto reductase family 1, member B10 (aldose reductase)	molecular function|aldo-keto reductase activity|TAS|GO:0004033|GOA|9565553//molecular function|oxidoreductase activity|IEA|GO:0016491|GOA|na//molecular function|protein binding|IPI|GO:0005515|GOA|18056116//biological process|cellular aldehyde metabolic process|TAS|GO:0006081|GOA|9565553//biological process|digestion|TAS|GO:0007586|GOA|9565553//biological process|oxidation reduction|IEA|GO:0055114…	Akr1b10	1	No	14	M	F02	1	MF02	6	No
A_23_P22027	chr7:155100071-155100130	INSIG1	NM_198337	Insulin induced gene 1	molecular function|protein binding|IPI|GO:0005515|GOA|ARRAY(0xf9660c)//biological process|ER-nuclear sterol response pathway|IDA|GO:0030967|GOA|12242332//biological process|cell proliferation|TAS|GO:0008283|GOA|9268630//biological process|cholesterol metabolic process|IEA|GO:0008203|GOA|na//biological process|metabolic process|TAS|GO:0008152|GOA|9268630//biological process|steroid metabolic proce…	Insig1	1	No	15	F	F22	1	FF22	9	No
A_23_P145841	chr7:16501993-16502052	SOSTDC1	NM_015464	Sclerostin domain containing 1	biological process|Wnt receptor signaling pathway|IEA|GO:0016055|GOA|na//cellular component|extracellular region|IEA|GO:0005576|GOA|na	Sostdc1	1	No	14	F	F10	1	FF10	9	No
A_23_P146284	chr8:126034443-126034502	SQLE	NM_003129	Squalene epoxidase	molecular function|FAD binding|IEA|GO:0050660|GOA|na//molecular function|oxidoreductase activity|IEA|GO:0016491|GOA|na//molecular function|squalene monooxygenase activity|EXP|GO:0004506|GOA|10666321//molecular function|squalene monooxygenase activity|NAS|GO:0004506|GOA|9286711//biological process|cellular aromatic compound metabolic process|IEA|GO:0006725|GOA|na//biological process|cholesterol me…	Sqle	1	No	14	F	F02	1	FF02	9	No
A_23_P146111	chr8:99205014-99205073	NIPAL2	NM_024759	NIPA-like domain containing 2	cellular component|integral to membrane|IEA|GO:0016021|GOA|na//cellular component|membrane|IEA|GO:0016020|GOA|na	Nipal2	1	No	15	M	M20	1	MM20	6	No
A_23_P251324	chr9:116080755-116080812	WDR31	NM_145241	WD repeat domain 31	0	Wdr31	1	No	16	F	M11	1	FM11	11	No
A_23_P255884	chr9:124094771-124094830	GSN	NM_198252	Gelsolin (amyloidosis, Finnish type)	molecular function|actin binding|IEA|GO:0003779|GOA|na//molecular function|calcium ion binding|TAS|GO:0005509|GOA|1321812//molecular function|protein binding|IPI|GO:0005515|GOA|ARRAY(0xf50b1c)//biological process|actin filament polymerization|IDA|GO:0030041|GOA|3020431//biological process|actin filament severing|IDA|GO:0051014|GOA|3020431//biological process|aging|IEA|GO:0007568|GOA|na//biologica…	Gsn	1	No	14	M	F10	1	MF10	6	No
A_23_P117515	chr14:58838770-58838829	ARID4A	NM_023001	AT rich interactive domain 4A (RBP1-like)	molecular function|DNA binding|IDA|GO:0003677|GOA|15640446//molecular function|chromatin binding|IEA|GO:0003682|GOA|na//molecular function|protein binding|IPI|GO:0005515|GOA|12724404//molecular function|protein binding|TAS|GO:0005515|GOA|1857421//molecular function|transcription factor activity|TAS|GO:0003700|GOA|8414517//molecular function|transcription repressor activity|IDA|GO:0016564|GOA|1272…	Arid4a	1	Yes	15	F	F10	1	FF10	9	Yes
A_23_P25305	chr12:103353454-103353513	ASCL1	NM_004316	Achaete-scute complex homolog 1 (Drosophila)	molecular function|E-box binding|IDA|GO:0070888|GOA|ARRAY(0xc7a5d0)//molecular function|bHLH transcription factor binding|IPI|GO:0043425|GOA|ARRAY(0x19c8358)//molecular function|protein binding|IPI|GO:0005515|GOA|10903890//molecular function|sequence-specific DNA binding|IEA|GO:0043565|GOA|na//molecular function|transcription factor activity|IDA|GO:0003700|GOA|10903890//biological process|Notch s…	Ascl1	1	Yes	16	F	F02	1	FF02	9	Yes
A_23_P144337	chr4:139966027-139966086	CCRN4L	NM_012118	CCR4 carbon catabolite repression 4-like (S. cerevisiae)	molecular function|transcription factor activity|TAS|GO:0003700|GOA|10521507//biological process|rhythmic process|IEA|GO:0048511|GOA|na//biological process|transcription from RNA polymerase II promoter|TAS|GO:0006366|GOA|10521507//cellular component|nucleus|TAS|GO:0005634|GOA|10521507	Ccrn4l	1	Yes	14	M	F02	1	MF02	6	Yes
A_23_P94338	chr8:120581508-120581567	ENPP2	NM_006209	Ectonucleotide pyrophosphatase/phosphodiesterase 2	molecular function|alkylglycerophosphoethanolamine phosphodiesterase activity|IEA|GO:0047391|GOA|na//molecular function|hydrolase activity|TAS|GO:0016787|GOA|7982964//molecular function|metal ion binding|IEA|GO:0046872|GOA|na//molecular function|nucleic acid binding|IEA|GO:0003676|GOA|na//molecular function|nucleotide diphosphatase activity|TAS|GO:0004551|GOA|8579579//molecular function|phosphodi…	Enpp2	1	Yes	16	F	M01	1	FM01	16	Yes
A_24_P248251	chr3:148793667-148793710	HLTF	NM_139048	Helicase-like transcription factor	molecular function|ATP binding|IEA|GO:0005524|GOA|na//molecular function|ATPase activity|IEA|GO:0016887|GOA|na//molecular function|DNA binding|IEA|GO:0003677|GOA|na//molecular function|RNA polymerase II transcription factor activity|IEA|GO:0003702|GOA|na//molecular function|helicase activity|IEA|GO:0004386|GOA|na//molecular function|hydrolase activity|IEA|GO:0016787|GOA|na//molecular function|hyd…	Hltf	1	Yes	15	F	F10	1	FF10	9	Yes
A_24_P398572	chr12:102789726-102789785	IGF1	NM_001111284	Insulin-like growth factor 1 (somatomedin C)	molecular function|growth factor activity|IEA|GO:0008083|GOA|na//molecular function|hormone activity|IDA|GO:0005179|GOA|7188854//molecular function|hormone activity|IEA|GO:0005179|GOA|na//molecular function|insulin receptor binding|IPI|GO:0005158|GOA|8452530//molecular function|insulin-like growth factor receptor binding|IPI|GO:0005159|GOA|8452530//molecular function|insulin-like growth factor re…	Igf1	1	Yes	16	M	M22	1	MM22	4	Yes
A_23_P45140	chr12:25362271-25362330	KRAS	NM_033360	V-Ki-ras2 Kirsten rat sarcoma viral oncogene homolog	molecular function|GDP binding|IEA|GO:0019003|GOA|na//molecular function|GMP binding|IEA|GO:0019002|GOA|na//molecular function|GTP binding|IEA|GO:0005525|GOA|na//molecular function|GTPase activity|IEA|GO:0003924|GOA|na//molecular function|LRR domain binding|IEA|GO:0030275|GOA|na//molecular function|nucleotide binding|IEA|GO:0000166|GOA|na//molecular function|protein binding|IPI|GO:0005515|GOA|ARR…	Kras	1	Yes	16	F	M20	1	FM20	13	Yes
A_23_P425704	chr17:37563012-37563071	MED1	NM_004774	Mediator complex subunit 1	molecular function|DNA binding|IEA|GO:0003677|GOA|na//molecular function|RNA polymerase II transcription mediator activity|IDA|GO:0016455|GOA|10198638//molecular function|chromatin binding|IEA|GO:0003682|GOA|na//molecular function|ligand-dependent nuclear receptor transcription coactivator activity|NAS|GO:0030374|GOA|10235266//molecular function|protein binding|IPI|GO:0005515|GOA|ARRAY(0x1bcf3dc)…	Med1	1	Yes	14	F	F11	1	FF11	6	Yes
A_23_P165295	chr19:13136196-13136255	NFIX	NM_002501	Nuclear factor I/X (CCAAT-binding transcription factor)	molecular function|RNA polymerase II transcription factor activity, enhancer binding|TAS|GO:0003705|GOA|7937100//molecular function|transcription factor activity|TAS|GO:0003700|GOA|ARRAY(0x2f2c6f0)//biological process|DNA replication|IEA|GO:0006260|GOA|na//biological process|regulation of transcription, DNA-dependent|IEA|GO:0006355|GOA|na//biological process|transcription from RNA polymerase II p…	Nfix	1	Yes	14	F	F02	1	FF02	9	Yes
A_23_P201179	chr1:114240019-114240078	PHTF1	AJ011863	Putative homeodomain transcription factor 1	molecular function|transcription factor activity|TAS|GO:0003700|GOA|10729229//biological process|regulation of transcription|IEA|GO:0045449|GOA|na//cellular component|cis-Golgi network|IEA|GO:0005801|GOA|na//cellular component|endoplasmic reticulum|IEA|GO:0005783|GOA|na//cellular component|nucleus|IEA|GO:0005634|GOA|na	Phtf1	1	Yes	15	M	M20	1	MM20	6	Yes
A_23_P31563	chr7:77584254-77584313	PHTF2	NM_001127358	Putative homeodomain transcription factor 2	molecular function|DNA binding|IEA|GO:0003677|GOA|na//biological process|regulation of transcription|IEA|GO:0045449|GOA|na//cellular component|endoplasmic reticulum|IDA|GO:0005783|GOA|11256614//cellular component|nucleus|IEA|GO:0005634|GOA|na	Phtf2	1	Yes	14	M	M01	1	MM01	5	Yes
A_23_P26124	chr15:60789657-60789716	RORA	NM_134262	RAR-related orphan receptor A	molecular function|ligand-dependent nuclear receptor activity|TAS|GO:0004879|GOA|7926749//molecular function|metal ion binding|IEA|GO:0046872|GOA|na//molecular function|protein binding|IPI|GO:0005515|GOA|16713569//molecular function|sequence-specific DNA binding|IEA|GO:0043565|GOA|na//molecular function|steroid hormone receptor activity|IEA|GO:0003707|GOA|na//molecular function|transcription fact…	Rora	1	Yes	15	F	M02	1	FM02	1	Yes
A_23_P8297	chr6:108025643-108025702	SCML4	NM_198081	Sex comb on midleg-like 4 (Drosophila)	molecular function|DNA binding|IEA|GO:0003677|GOA|na//biological process|regulation of transcription|IEA|GO:0045449|GOA|na//cellular component|nucleus|IEA|GO:0005634|GOA|na	Scml4	1	Yes	15	F	F02	1	FF02	9	Yes
A_23_P4014	chr17:2203709-2203767	SMG6	NM_017575	Smg-6 homolog, nonsense mediated mRNA decay factor (C. elegans)	molecular function|DNA binding|IEA|GO:0003677|GOA|na//molecular function|endonuclease activity|IEA|GO:0004519|GOA|na//molecular function|hydrolase activity|IEA|GO:0016787|GOA|na//molecular function|metal ion binding|IEA|GO:0046872|GOA|na//molecular function|protein binding|IPI|GO:0005515|GOA|12699629//molecular function|telomeric DNA binding|IDA|GO:0042162|GOA|12699629//biological process|mRNA ex…	Smg6	1	Yes	15	F	F10	1	FF10	9	Yes
A_23_P153676	chr19:2997884-2997943	TLE2	NM_003260	Transducin-like enhancer of split 2 (E(sp1) homolog, Drosophila)	molecular function|protein binding|IPI|GO:0005515|GOA|17041588//biological process|Wnt receptor signaling pathway|IEA|GO:0016055|GOA|na//biological process|organ morphogenesis|TAS|GO:0009887|GOA|8808280//biological process|regulation of transcription|IEA|GO:0045449|GOA|na//biological process|signal transduction|TAS|GO:0007165|GOA|8808280//cellular component|nucleus|IEA|GO:0005634|GOA|na	Tle2	1	Yes	14	M	F10	1	MF10	6	Yes
A_23_P29922	chr4:187005890-187005949	TLR3	NM_003265	Toll-like receptor 3	molecular function|double-stranded RNA binding|IDA|GO:0003725|GOA|16111635//molecular function|double-stranded RNA binding|NAS|GO:0003725|GOA|12054664//molecular function|protein binding|IEA|GO:0005515|GOA|na//molecular function|receptor activity|TAS|GO:0004872|GOA|10426995//molecular function|transmembrane receptor activity|NAS|GO:0004888|GOA|12054664//biological process|I-kappaB phosphorylation…	Tlr3	1	Yes	14	F	F12	1	FF12	4	Yes
A_24_P193011	chr11:69458639-69458698	CCND1	NM_053056	Cyclin D1	molecular function|cyclin-dependent protein kinase regulator activity|IEA|GO:0016538|GOA|na//molecular function|protein binding|IPI|GO:0005515|GOA|ARRAY(0xe460a0)//molecular function|protein complex binding|IEA|GO:0032403|GOA|na//molecular function|protein kinase activity|IEA|GO:0004672|GOA|na//molecular function|protein kinase binding|IPI|GO:0019901|GOA|8114739//biological process|G1/S DNA damag…	Ccnd1	1	No	16	F	M22	1	FM22	5	Yes
A_24_P75056	chr11:74329798-74329850	POLD3	NM_006591	Polymerase (DNA-directed), delta 3, accessory subunit	molecular function|DNA-directed DNA polymerase activity|NAS|GO:0003887|GOA|10219083//molecular function|nucleotidyltransferase activity|IEA|GO:0016779|GOA|na//molecular function|protein binding|IPI|GO:0005515|GOA|16510448//molecular function|transferase activity|IEA|GO:0016740|GOA|na//biological process|DNA synthesis during DNA repair|NAS|GO:0000731|GOA|7910606//biological process|DNA-dependent D…	Pold3	1	No	14	F	M01	1	FM01	16	Yes
A_32_P174083	chr7:25158320-25158379	CYCS	NM_018947	Cytochrome c, somatic	molecular function|electron transporter, transferring electrons from CoQH2-cytochrome c reductase complex and cytochrome c oxidase complex activity|IDA|GO:0045155|GOA|8689682//molecular function|heme binding|TAS|GO:0020037|GOA|9515723//molecular function|metal ion binding|IEA|GO:0046872|GOA|na//molecular function|protein binding|IPI|GO:0005515|GOA|ARRAY(0x1d9a630)//molecular function|protein seri…	Cycs	1	No	15	M	M22	1	MM22	4	Yes
A_23_P96827	chr1:159558017-159558076	APCS	NM_001639	Amyloid P component, serum	molecular function|metal ion binding|IEA|GO:0046872|GOA|na//molecular function|sugar binding|IEA|GO:0005529|GOA|na//molecular function|unfolded protein binding|TAS|GO:0051082|GOA|10812074//biological process|acute-phase response|TAS|GO:0006953|GOA|2987268//biological process|chaperone-mediated protein complex assembly|TAS|GO:0051131|GOA|10972085//biological process|protein complex assembly|IEA|GO…	Apcs	1	No	15	M	F02	1	MF02	6	Yes
A_32_P214665	chr1:161255021-161255080	PCP4L1	NM_001102566	Purkinje cell protein 4 like 1	0	Pcp4l1	1	No	16	F	M21	1	FM21	3	Yes
A_23_P12392	chr1:198662240-198662299	PTPRC	NM_080923	Protein tyrosine phosphatase, receptor type, C	molecular function|heparan sulfate proteoglycan binding|IEA|GO:0043395|GOA|na//molecular function|heparin binding|IEA|GO:0008201|GOA|na//molecular function|hydrolase activity|IEA|GO:0016787|GOA|na//molecular function|protein binding|IPI|GO:0005515|GOA|ARRAY(0xc49f68)//molecular function|protein kinase binding|IPI|GO:0019901|GOA|14625311//molecular function|protein tyrosine phosphatase activity|EX…	Ptprc	1	No	14	F	F10	1	FF10	9	Yes
A_24_P52597	chr10:104590302-104590361	CYP17A1	NM_000102	Cytochrome P450, family 17, subfamily A, polypeptide 1	molecular function|electron carrier activity|IEA|GO:0009055|GOA|na//molecular function|heme binding|IEA|GO:0020037|GOA|na//molecular function|metal ion binding|IEA|GO:0046872|GOA|na//molecular function|monooxygenase activity|IEA|GO:0004497|GOA|na//molecular function|oxygen binding|TAS|GO:0019825|GOA|2808364//molecular function|steroid 17-alpha-monooxygenase activity|EXP|GO:0004508|GOA|10406467//b…	Cyp17a1	1	No	16	F	M11	1	FM11	11	Yes
A_23_P104237	chr10:113913394-113913425	GPAM	NM_020918	Glycerol-3-phosphate acyltransferase, mitochondrial	molecular function|acyltransferase activity|IEA|GO:0008415|GOA|na//molecular function|glycerol-3-phosphate O-acyltransferase activity|EXP|GO:0004366|GOA|11546763//molecular function|glycerol-3-phosphate O-acyltransferase activity|IMP|GO:0004366|GOA|18238778//molecular function|transferase activity|IEA|GO:0016740|GOA|na//biological process|fatty acid metabolic process|IEA|GO:0006631|GOA|na//biolog…	Gpam	1	No	14	F	F22	1	FF22	9	Yes
A_32_P59549	chr10:118030342-118030401	GFRA1	NM_145793	GDNF family receptor alpha 1	molecular function|glial cell line-derived neurotrophic factor receptor activity|TAS|GO:0016167|GOA|10829012//molecular function|receptor activity|NAS|GO:0004872|GOA|na//molecular function|receptor binding|TAS|GO:0005102|GOA|9545641//biological process|cell surface receptor linked signaling pathway|NAS|GO:0007166|GOA|8674117//biological process|nervous system development|IEA|GO:0007399|GOA|na//ce…	Gfra1	1	No	14	F	M21	1	FM21	3	Yes
A_24_P213494	chr10:129854387-129854429	PTPRE	NM_130435	Protein tyrosine phosphatase, receptor type, E	molecular function|hydrolase activity|IEA|GO:0016787|GOA|na//molecular function|protein binding|IPI|GO:0005515|GOA|ARRAY(0x2e8cba0)//molecular function|protein homodimerization activity|IEA|GO:0042803|GOA|na//molecular function|transmembrane receptor protein tyrosine phosphatase activity|TAS|GO:0005001|GOA|2170109//biological process|negative regulation of insulin receptor signaling pathway|ISS|G…	Ptpre	1	No	14	F	F01	1	FF01	2	Yes
A_23_P115919	chr10:13320283-13320342	PHYH	NM_006214	Phytanoyl-CoA 2-hydroxylase	molecular function|L-ascorbic acid binding|IEA|GO:0031418|GOA|na//molecular function|catalytic activity|TAS|GO:0003824|GOA|9326939//molecular function|electron carrier activity|TAS|GO:0009055|GOA|8954107//molecular function|metal ion binding|IEA|GO:0046872|GOA|na//molecular function|oxidoreductase activity, acting on single donors with incorporation of molecular oxygen, incorporation of two atoms…	Phyh	1	No	16	F	M21	1	FM21	3	Yes
A_24_P206679	chr10:54525221-54525280	MBL2	NM_000242	Mannose-binding lectin (protein C) 2, soluble (opsonic defect)	molecular function|bacterial cell surface binding|TAS|GO:0051635|GOA|2477488//molecular function|calcium-dependent protein binding|IPI|GO:0048306|GOA|ARRAY(0x14d7328)//molecular function|eukaryotic cell surface binding|TAS|GO:0043499|GOA|2477488//molecular function|mannose binding|NAS|GO:0005537|GOA|11549596//molecular function|mannose binding|TAS|GO:0005537|GOA|2477488//molecular function|protei…	Mbl2	1	No	15	M	M22	1	MM22	4	Yes
A_24_P341985	chr11:112085547-112085606	BCO2	NM_031938	Beta-carotene oxygenase 2	molecular function|metal ion binding|IEA|GO:0046872|GOA|na//molecular function|oxidoreductase activity|IEA|GO:0016491|GOA|na//molecular function|oxidoreductase activity, acting on single donors with incorporation of molecular oxygen, incorporation of two atoms of oxygen|IDA|GO:0016702|GOA|11278918//biological process|carotene metabolic process|IDA|GO:0016119|GOA|11278918//biological process|oxida…	Bco2	1	No	15	F	M11	1	FM11	11	Yes
A_23_P75630	chr11:116660206-116660265	APOA5	NM_052968	Apolipoprotein A-V	molecular function|enzyme activator activity|IDA|GO:0008047|GOA|16806135//molecular function|enzyme binding|IDA|GO:0019899|GOA|15178420//molecular function|heparin binding|IDA|GO:0008201|GOA|15878877//molecular function|heparin binding|IDA|GO:0008201|GOA|17326667//molecular function|lipase activator activity|IMP|GO:0060229|GOA|15178420//molecular function|lipid binding|IDA|GO:0008289|GOA|12810715…	Apoa5	1	No	14	F	F22	1	FF22	9	Yes
A_24_P252934	chr11:116693887-116693946	APOA4	NM_000482	Apolipoprotein A-IV	molecular function|antioxidant activity|IDA|GO:0016209|GOA|16945374//molecular function|cholesterol transporter activity|IDA|GO:0017127|GOA|1935934//molecular function|copper ion binding|IDA|GO:0005507|GOA|16945374//molecular function|eukaryotic cell surface binding|IDA|GO:0043499|GOA|1935934//molecular function|lipid binding|IMP|GO:0008289|GOA|16159879//molecular function|lipid transporter activ…	Apoa4	1	No	16	F	M22	1	FM22	5	Yes
A_23_P87049	chr11:121500247-121500306	SORL1	NM_003105	Sortilin-related receptor, L(DLR class) A repeats-containing	molecular function|low-density lipoprotein binding|IPI|GO:0030169|GOA|17326667//molecular function|transmembrane receptor activity|TAS|GO:0004888|GOA|9157966//biological process|cholesterol metabolic process|IEA|GO:0008203|GOA|na//biological process|lipid transport|IEA|GO:0006869|GOA|na//biological process|receptor-mediated endocytosis|TAS|GO:0006898|GOA|9157966//biological process|steroid metabo…	Sorl1	1	No	14	F	M11	1	FM11	11	Yes
A_23_P2041	chr11:12380556-12380615	MICALCL	NM_032867	MICAL C-terminal like	molecular function|mitogen-activated protein kinase binding|ISS|GO:0051019|GOA|na//biological process|biological_process|ND|GO:0008150|GOA|na//biological process|cell differentiation|IEA|GO:0030154|GOA|na//biological process|multicellular organismal development|IEA|GO:0007275|GOA|na//biological process|spermatogenesis|IEA|GO:0007283|GOA|na//cellular component|cytoplasm|ISS|GO:0005737|GOA|na	Micalcl	1	No	14	F	F11	1	FF11	6	Yes
A_24_P295791	chr11:75509279-75509338	DGAT2	NM_032564	Diacylglycerol O-acyltransferase homolog 2 (mouse)	molecular function|2-acylglycerol O-acyltransferase activity|IEA|GO:0003846|GOA|na//molecular function|acyltransferase activity|IEA|GO:0008415|GOA|na//molecular function|diacylglycerol O-acyltransferase activity|IDA|GO:0004144|GOA|11481335//molecular function|transferase activity|IEA|GO:0016740|GOA|na//biological process|glycerol metabolic process|IEA|GO:0006071|GOA|na//biological process|lipid b…	Dgat2	1	No	15	F	F02	1	FF02	9	Yes
A_23_P361448	chr11:94917588-94917647	SESN3	NM_144665	Sestrin 3	biological process|cell cycle arrest|IEA|GO:0007050|GOA|na//cellular component|nucleus|IEA|GO:0005634|GOA|na	Sesn3	1	No	14	F	M20	1	FM20	13	Yes
A_23_P53736	chr12:117581809-117581868	FBXO21	NM_033624	F-box protein 21	molecular function|ubiquitin-protein ligase activity|NAS|GO:0004842|GOA|10531035//biological process|ubiquitin-dependent protein catabolic process|NAS|GO:0006511|GOA|10531035//cellular component|ubiquitin ligase complex|NAS|GO:0000151|GOA|10531035	Fbxo21	1	No	14	M	M01	1	MM01	5	Yes
A_24_P319113	chr12:121613218-121613277	P2RX7	NM_002562	Purinergic receptor P2X, ligand-gated ion channel, 7	molecular function|ATP binding|IC|GO:0005524|GOA|9038151//molecular function|channel activity|IEA|GO:0015267|GOA|na//molecular function|copper ion binding|IEA|GO:0005507|GOA|na//molecular function|extracellular ATP-gated cation channel activity|IDA|GO:0004931|GOA|9038151//molecular function|ion channel activity|IEA|GO:0005216|GOA|na//molecular function|lipopolysaccharide binding|ISS|GO:0001530|GO…	P2rx7	1	No	14	F	M01	1	FM01	16	Yes
A_24_P275386	chr12:125510811-125510870	BRI3BP	AK055703	BRI3 binding protein	cellular component|integral to membrane|IEA|GO:0016021|GOA|na//cellular component|membrane|IEA|GO:0016020|GOA|na	Bri3bp	1	No	14	F	F02	1	FF02	9	Yes
A_23_P337917	chr12:27731136-27731172	PPFIBP1	NM_177444	PTPRF interacting protein, binding protein 1 (liprin beta 1)	molecular function|protein binding|IPI|GO:0005515|GOA|17353931//biological process|cell adhesion|TAS|GO:0007155|GOA|9624153//cellular component|plasma membrane|NAS|GO:0005886|GOA|9624153	Ppfibp1	1	No	16	F	M11	1	FM11	11	Yes
A_23_P44724	chr12:77252554-77252613	CSRP2	NM_001321	Cysteine and glycine-rich protein 2	molecular function|metal ion binding|IEA|GO:0046872|GOA|na//molecular function|molecular_function|ND|GO:0003674|GOA|na//molecular function|zinc ion binding|IEA|GO:0008270|GOA|na//biological process|cell differentiation|NAS|GO:0030154|GOA|na//biological process|cell growth|NAS|GO:0016049|GOA|na//biological process|cell proliferation|NAS|GO:0008283|GOA|na//biological process|multicellular organisma…	Csrp2	1	No	16	F	F22	1	FF22	9	Yes
A_24_P143599	chr13:113460565-113460608	ATP11A	NM_032189	ATPase, class VI, type 11A	molecular function|ATP binding|IEA|GO:0005524|GOA|na//molecular function|ATPase activity, coupled to transmembrane movement of ions, phosphorylative mechanism|IEA|GO:0015662|GOA|na//molecular function|hydrolase activity|IEA|GO:0016787|GOA|na//molecular function|hydrolase activity, acting on acid anhydrides, catalyzing transmembrane movement of substances|IEA|GO:0016820|GOA|na//molecular function|…	Atp11a	1	No	14	F	M01	1	FM01	16	Yes
A_23_P139950	chr13:50279783-50279842	KPNA3	NM_002267	Karyopherin alpha 3 (importin alpha 4)	molecular function|nuclear localization sequence binding|TAS|GO:0008139|GOA|9435235//molecular function|protein C-terminus binding|IEA|GO:0008022|GOA|na//molecular function|protein binding|IPI|GO:0005515|GOA|ARRAY(0x13cfb10)//molecular function|protein transporter activity|IEA|GO:0008565|GOA|na//biological process|NLS-bearing substrate import into nucleus|TAS|GO:0006607|GOA|9435235//biological pr…	Kpna3	1	No	16	F	M20	1	FM20	13	Yes
A_23_P205778	chr15:52414848-52414907	GNB5	NM_016194	Guanine nucleotide binding protein (G protein), beta 5	molecular function|GTPase activity|NAS|GO:0003924|GOA|9606987//molecular function|protein binding|IEA|GO:0005515|GOA|na//molecular function|signal transducer activity|NAS|GO:0004871|GOA|9606987//biological process|G-protein coupled receptor protein signaling pathway|IEA|GO:0007186|GOA|na//biological process|signal transduction|NAS|GO:0007165|GOA|9606987//cellular component|heterotrimeric G-protei…	Gnb5	1	No	14	F	F22	1	FF22	9	Yes
A_23_P206113	chr15:75043624-75044138	CYP1A2	NM_000761	Cytochrome P450, family 1, subfamily A, polypeptide 2	molecular function|aromatase activity|IEA|GO:0070330|GOA|na//molecular function|caffeine oxidase activity|IDA|GO:0034875|GOA|18619574//molecular function|demethylase activity|IDA|GO:0032451|GOA|2813353//molecular function|electron carrier activity|TAS|GO:0009055|GOA|2813353//molecular function|enzyme binding|IPI|GO:0019899|GOA|15680923//molecular function|heme binding|IDA|GO:0020037|GOA|17311915/…	Cyp1a2	1	No	14	F	F22	1	FF22	9	Yes
A_23_P78108	chr17:26900423-26900482	ALDOC	NM_005165	Aldolase C, fructose-bisphosphate	molecular function|cytoskeletal protein binding|IDA|GO:0008092|GOA|9244396//molecular function|fructose-bisphosphate aldolase activity|IDA|GO:0004332|GOA|ARRAY(0x1534ed8)//molecular function|lyase activity|IEA|GO:0016829|GOA|na//molecular function|protein binding|IPI|GO:0005515|GOA|11399750//biological process|aging|IEA|GO:0007568|GOA|na//biological process|apoptosis|IEA|GO:0006915|GOA|na//biolog…	Aldoc	1	No	14	F	F11	1	FF11	6	Yes
A_23_P135878	chr18:12448459-12448518	SPIRE1	NM_020148	Spire homolog 1 (Drosophila)	molecular function|actin binding|IEA|GO:0003779|GOA|na//molecular function|protein binding|IPI|GO:0005515|GOA|17353931//biological process|transport|IEA|GO:0006810|GOA|na//cellular component|cytoplasm|IEA|GO:0005737|GOA|na//cellular component|cytoskeleton|IEA|GO:0005856|GOA|na//cellular component|perinuclear region of cytoplasm|IEA|GO:0048471|GOA|na	Spire1	1	No	16	M	F10	1	MF10	6	Yes
A_23_P89780	chr18:21534735-21534794	LAMA3	NM_198129	Laminin, alpha 3	molecular function|receptor binding|IEA|GO:0005102|GOA|na//molecular function|structural molecule activity|NAS|GO:0005198|GOA|8586427//biological process|epidermis development|TAS|GO:0008544|GOA|8586427//biological process|hemidesmosome assembly|EXP|GO:0031581|GOA|16757171//biological process|regulation of cell adhesion|IEA|GO:0030155|GOA|na//biological process|regulation of cell migration|IEA|GO…	Lama3	1	No	15	F	M20	1	FM20	13	Yes
A_24_P254101	chr19:32975930-32975989	DPY19L3	NM_207325	Dpy-19-like 3 (C. elegans)	cellular component|integral to membrane|IEA|GO:0016021|GOA|na//cellular component|membrane|IEA|GO:0016020|GOA|na	Dpy19l3	1	No	15	M	M20	1	MM20	6	Yes
A_24_P353964	chr2:26459795-26459854	HADHA	NM_000182	Hydroxyacyl-Coenzyme A dehydrogenase/3-ketoacyl-Coenzyme A thiolase/enoyl-Coenzyme A hydratase (trifunctional protein), alpha subunit	molecular function|3-hydroxyacyl-CoA dehydrogenase activity|IEA|GO:0003857|GOA|na//molecular function|NAD or NADH binding|IEA|GO:0051287|GOA|na//molecular function|acetyl-CoA C-acetyltransferase activity|TAS|GO:0003985|GOA|8135828//molecular function|acetyl-CoA C-acyltransferase activity|IEA|GO:0003988|GOA|na//molecular function|acyl-CoA binding|IEA|GO:0000062|GOA|na//molecular function|binding|I…	Hadha	1	No	15	F	M01	1	FM01	16	Yes
A_24_P179479	chr2:37495239-37495298	PRKD3	BC030706	Protein kinase D3	molecular function|ATP binding|IEA|GO:0005524|GOA|na//molecular function|metal ion binding|IEA|GO:0046872|GOA|na//molecular function|nucleotide binding|IEA|GO:0000166|GOA|na//molecular function|protein binding|IPI|GO:0005515|GOA|17196367//molecular function|protein kinase C activity|IEA|GO:0004697|GOA|na//molecular function|transferase activity|IEA|GO:0016740|GOA|na//biological process|activation…	Prkd3	1	No	15	F	M11	1	FM11	11	Yes
A_23_P154605	chr20:46286424-46286483	SULF2	NM_198596	Sulfatase 2	molecular function|arylsulfatase activity|IDA|GO:0004065|GOA|12368295//molecular function|calcium ion binding|IEA|GO:0005509|GOA|na//molecular function|hydrolase activity|IEA|GO:0016787|GOA|na//biological process|heparan sulfate proteoglycan metabolic process|NAS|GO:0030201|GOA|12368295//biological process|metabolic process|IEA|GO:0008152|GOA|na//cellular component|Golgi apparatus|IEA|GO:0005794|…	Sulf2	1	No	14	M	F10	1	MF10	6	Yes
A_32_P74643	chr3:105086223-105086282	ALCAM	NM_001627	Activated leukocyte cell adhesion molecule	molecular function|receptor binding|TAS|GO:0005102|GOA|7760007//biological process|cell adhesion|IEA|GO:0007155|GOA|na//biological process|motor axon guidance|IEA|GO:0008045|GOA|na//biological process|signal transduction|TAS|GO:0007165|GOA|7760007//cellular component|axon|IEA|GO:0030424|GOA|na//cellular component|external side of plasma membrane|IEA|GO:0009897|GOA|na//cellular component|integral …	Alcam	1	No	15	F	F12	1	FF12	4	Yes
A_24_P196382	chr3:112252293-112252352	ATG3	BC043267	ATG3 autophagy related 3 homolog (S. cerevisiae)	molecular function|enzyme binding|IPI|GO:0019899|GOA|11825910//molecular function|protein binding|IPI|GO:0005515|GOA|ARRAY(0x2f3efa4)//molecular function|small conjugating protein ligase activity|IDA|GO:0019787|GOA|11825910//biological process|autophagic vacuole assembly|ISS|GO:0000045|GOA|na//biological process|autophagy|IEA|GO:0006914|GOA|na//biological process|protein modification process|IDA|…	Atg3	1	No	16	M	F10	1	MF10	6	Yes
A_24_P294408	chr3:119348247-119348306	PLA1A	NM_015900	Phospholipase A1 member A	molecular function|hydrolase activity|IEA|GO:0016787|GOA|na//molecular function|phospholipase A1 activity|TAS|GO:0008970|GOA|10196188//biological process|lipid catabolic process|IEA|GO:0016042|GOA|na//biological process|lipid metabolic process|TAS|GO:0006629|GOA|10196188//biological process|phosphatidylserine metabolic process|TAS|GO:0006658|GOA|10196188//cellular component|extracellular region|I…	Pla1a	1	No	14	M	F11	1	MF11	1	Yes
A_23_P92623	chr4:101946679-101946738	PPP3CA	NM_001130692	Protein phosphatase 3, catalytic subunit, alpha isozyme	molecular function|calcium ion binding|NAS|GO:0005509|GOA|8392375//molecular function|calcium-dependent protein serine/threonine phosphatase activity|IEA|GO:0004723|GOA|na//molecular function|calmodulin binding|NAS|GO:0005516|GOA|8392375//molecular function|hydrolase activity|IEA|GO:0016787|GOA|na//molecular function|protein binding|IPI|GO:0005515|GOA|ARRAY(0x2976660)//molecular function|protein …	Ppp3ca	1	No	15	F	F12	1	FF12	4	Yes
A_23_P363936	chr4:128754250-128754309	HSPA4L	NM_014278	Heat shock 70kDa protein 4-like	molecular function|ATP binding|ISS|GO:0005524|GOA|na//molecular function|nucleotide binding|IEA|GO:0000166|GOA|na//molecular function|protein binding|IPI|GO:0005515|GOA|17353931//biological process|protein folding|ISS|GO:0006457|GOA|na//biological process|response to unfolded protein|ISS|GO:0006986|GOA|na//cellular component|cytoplasm|ISS|GO:0005737|GOA|na//cellular component|nucleus|ISS|GO:00056…	Hspa4l	1	No	15	M	F22	1	MF22	4	Yes
A_24_P69053	chr4:183717844-183717903	ODZ3	NM_001080477	Odz, odd Oz/ten-m homolog 3 (Drosophila)	biological process|signal transduction|IEA|GO:0007165|GOA|na//cellular component|integral to membrane|IEA|GO:0016021|GOA|na//cellular component|membrane|IEA|GO:0016020|GOA|na	Odz3	1	No	15	F	M20	1	FM20	13	Yes
A_23_P110569	chr5:114460701-114460760	TRIM36	NM_018700	Tripartite motif-containing 36	molecular function|ligase activity|IEA|GO:0016874|GOA|na//molecular function|metal ion binding|IEA|GO:0046872|GOA|na//molecular function|protein binding|IEA|GO:0005515|GOA|na//molecular function|zinc ion binding|IEA|GO:0008270|GOA|na//biological process|acrosome reaction|IEA|GO:0007340|GOA|na//cellular component|acrosomal vesicle|IEA|GO:0001669|GOA|na//cellular component|cytoplasm|IEA|GO:0005737|…	Trim36	1	No	15	F	F22	1	FF22	9	Yes
A_24_P923353	chr6:24535617-24535676	ALDH5A1	NM_170740	Aldehyde dehydrogenase 5 family, member A1	molecular function|oxidoreductase activity|IEA|GO:0016491|GOA|na//molecular function|protein homodimerization activity|IC|GO:0042803|GOA|16199352//molecular function|succinate-semialdehyde dehydrogenase activity|IDA|GO:0004777|GOA|9683595//molecular function|succinate-semialdehyde dehydrogenase activity|ISS|GO:0004777|GOA|7814412//biological process|acetate metabolic process|ISS|GO:0006083|GOA|na…	Aldh5a1	1	No	14	F	M01	1	FM01	16	Yes
A_23_P146198	chr8:59403414-59403473	CYP7A1	NM_000780	Cytochrome P450, family 7, subfamily A, polypeptide 1	molecular function|cholesterol 7-alpha-monooxygenase activity|EXP|GO:0008123|GOA|2384150//molecular function|cholesterol 7-alpha-monooxygenase activity|ISS|GO:0008123|GOA|na//molecular function|electron carrier activity|IEA|GO:0009055|GOA|na//molecular function|heme binding|IEA|GO:0020037|GOA|na//molecular function|metal ion binding|IEA|GO:0046872|GOA|na//molecular function|monooxygenase activity…	Cyp7a1	1	No	14	F	M20	1	FM20	13	Yes
A_23_P112289	chr9:100362821-100362880	TMOD1	NM_003275	Tropomodulin 1	molecular function|actin binding|IEA|GO:0003779|GOA|na//molecular function|tropomyosin binding|IEA|GO:0005523|GOA|na//biological process|myofibril assembly|IEA|GO:0030239|GOA|na//cellular component|cortical cytoskeleton|IEA|GO:0030863|GOA|na//cellular component|cytoplasm|IEA|GO:0005737|GOA|na//cellular component|membrane|IEA|GO:0016020|GOA|na//cellular component|myofibril|IEA|GO:0030016|GOA|na//c…	Tmod1	1	No	16	F	F02	1	FF02	9	Yes
A_23_P71598	chr9:13106799-13106858	MPDZ	NM_003829	Multiple PDZ domain protein	molecular function|protein C-terminus binding|IPI|GO:0008022|GOA|11802782//molecular function|protein binding|IPI|GO:0005515|GOA|16192269//biological process|interspecies interaction between organisms|IEA|GO:0044419|GOA|na//cellular component|apical plasma membrane|IEA|GO:0016324|GOA|na//cellular component|cell junction|IEA|GO:0030054|GOA|na//cellular component|cell projection|IEA|GO:0042995|GOA|…	Mpdz	1	No	14	F	F02	1	FF02	9	Yes
A_24_P331560	chrX:7271727-7271786	STS	NM_000351	Steroid sulfatase (microsomal), isozyme S	molecular function|hydrolase activity|IEA|GO:0016787|GOA|na//molecular function|metal ion binding|IEA|GO:0046872|GOA|na//molecular function|steryl-sulfatase activity|IEA|GO:0004773|GOA|na//molecular function|sulfuric ester hydrolase activity|IDA|GO:0008484|GOA|15962010//biological process|epidermis development|TAS|GO:0008544|GOA|9252398//biological process|female pregnancy|IEA|GO:0007565|GOA|na//…	Sts	1	No	16	F	M20	1	FM20	13	Yes
A_24_P281908	chr12:111655692-111655741	CUX2	NM_015267	Cut-like homeobox 2	molecular function|sequence-specific DNA binding|IEA|GO:0043565|GOA|na//molecular function|transcription factor activity|NAS|GO:0003700|GOA|na//molecular function|transcription repressor activity|IEA|GO:0016564|GOA|na//biological process|negative regulati	Cux2	1	Yes	16	M	F02	1	MF02	6	Yes

## Sheet: Table S5D
Table S5D - This sheet lists the enriched functional clusters identified by DAVID (enrichment score >1.5) for mouse liver sex-biased genes whose expression is altered by hypophysectomy and also show sex-bias in human liver.
Clusters	Enrichment score	Cluster gene count	Generalized term	Top term	Top term P_value	All terms in the cluster	Genes in the cluster
1	4.34	71	non-membrane-bounded organelle | cytoskeleton	GO:0043228~non-membrane-bounded organelle	8.75404e-05	GO:0043228~non-membrane-bounded organelle|GO:0005856~cytoskeleton|GO:0043232~intracellular non-membrane-bounded organelle|GO:0043228~non-membrane-bounded organelle|cytoskeleton|	ZMAT1, ARID4A, TLN2, STRN, TTLL7, OFD1, ANK1, ORC4L, GTF2A1, EVI5, ANK3, ZNF148, PGRMC1, DDX24, CNTLN, OXR1, NOL6, MPDZ, NOL8, ZFX, MICAL3, GRHL1, TACC1, PURA, EML4, MYCN, MAST1, EPB41L1, EP300, TNS1, RFC1, RIF1, CGN, FNBP1L, RPS4Y2, CSTB, OPHN1, EDA, SGCB, ADD1, CEP97, PPP4R2, PLEK2, ALDOC, LRRCC1, NEDD9, AHCTF1, TPM1, NR2C2, HADHA, TRIB2, PFN2, RGS12, ETV6, TRIP11, FYB, NOS1, KIF3A, NF2, SMG6, …
2	3.87	22	plasma membrane part | cell junction	GO:0030054~cell junction	0.000346464	GO:0030054~cell junction|cell junction|hsa04530:Tight junction|GO:0005911~cell-cell junction|GO:0030054~cell junction|GO:0016327~apicolateral plasma membrane|Tight junction|GO:0043296~apical junction complex|GO:0070160~occluding junction|GO:0005923~tight junction|	PTPRC, MAGI3, NF2, GABRB3, TLN2, LPP, MPDZ, CNKSR3, NEDD9, STRN, ABCB1, MPP7, PPP1R9A, P2RX7, LAMA3, TNS1, CGN, WNK4, ASH1L, CLDN1, OPHN1, PARD3B
3	2.42	10	PDZ/DHR/GLGF domain	IPR001478:PDZ/DHR/GLGF	0.00120913	IPR001478:PDZ/DHR/GLGF|domain:PDZ|SM00228:PDZ|IPR001478:PDZ/DHR/GLGF|	MAGI3, PPP1R9A, MAST1, NOS1, RGS12, MPDZ, CNKSR3, MPP7, PARD3B, SYNJ2BP
4	2.29	25	cell projection | neuron projection	GO:0042995~cell projection	0.00135409	GO:0042995~cell projection|GO:0030425~dendrite|GO:0045202~synapse|GO:0044463~cell projection part|GO:0030424~axon|GO:0042995~cell projection|GO:0043005~neuron projection|	GABRB3, PLEK2, TLN2, ALDOC, NEDD9, STRN, TTLL7, TPM1, ALCAM, ANK3, PRSS12, ARHGEF4, CCDC88A, NOS1, NF2, MPDZ, DOCK7, CYP17A1, P2RX7, EFHC1, PPP1R9A, TSGA10, OPHN1, LIPC, MYH10
5	2.28	10	lipid biosynthetic process	GO:0008610~lipid biosynthetic process	0.13102	GO:0008610~lipid biosynthetic process|Acyltransferase|GO:0045017~glycerolipid biosynthetic process|GO:0044242~cellular lipid catabolic process|GO:0008610~lipid biosynthetic process|GO:0008374~O-acyltransferase activity|GO:0016042~lipid catabolic process|GO:0016411~acylglycerol O-acyltransferase activity|GO:0046503~glycerolipid catabolic process|GO:0044269~glycerol ether catabolic process|GO:00464…	CYP17A1, P2RX7, DGAT1, LPGAT1, DGAT2, PBX1, LIPC, GPAM, PNPLA3, FDFT1
6	1.99	10	basolateral plasma membrane	GO:0016323~basolateral plasma membrane	0.0101025	GO:0016323~basolateral plasma membrane|GO:0030055~cell-substrate junction|GO:0070161~anchoring junction|GO:0005924~cell-substrate adherens junction|GO:0016323~basolateral plasma membrane|GO:0005925~focal adhesion|GO:0005912~adherens junction|	PTPRC, TNS1, ANK1, LAMA3, TLN2, LPP, ANK3, P2RY1, NEDD9, ABCB1
7	1.98	100	transcription regulation	nucleus	0.00016084	nucleus|GO:0006357~regulation of transcription from RNA polymerase II promoter|GO:0051252~regulation of RNA metabolic process|GO:0006355~regulation of transcription, DNA-dependent|GO:0003700~transcription factor activity|GO:0030528~transcription regulator activity|GO:0045449~regulation of transcription|dna-binding|GO:0003677~DNA binding|GO:0006350~transcription|transcription regulation|Transcript…	MEF2A, BBX, RBM9, C14ORF4, MIER1, ZFP90, PHTF2, PHTF1, SRRM1, MLL3, GABPB2, MAGI3, C11ORF30, GRHL1, TACC1, EP300, RFC1, CSTB, MGA, CDCA7L, NEK1, ONECUT2, NEDD9, AHCTF1, SOX6, CXXC5, RRAGD, NR2C2, NIPBL, DDX3X, ZNF329, KLF6, ZC3H18, SMG6, LPP, KLF13, CSRP2, SAFB2, POLD3, HOXB3, UACA, DMTF1, POP1, TSGA10, PLEKHA2, ZMAT1, ARID4A, ZBTB38, ORC4L, GTF2A1, EVI5, ZNF148, ANKRD12, RBM47, NOL6, ATF7IP, NOL…
8	1.97	20	cytoskeleton organization	GO:0007010~cytoskeleton organization	0.000356966	GO:0007010~cytoskeleton organization|GO:0008092~cytoskeletal protein binding|actin-binding|GO:0015629~actin cytoskeleton|GO:0003779~actin binding|GO:0030029~actin filament-based process|GO:0030036~actin cytoskeleton organization|GO:0007010~cytoskeleton organization|	NEURL, PLEK2, NF2, TLN2, NEDD9, DOCK7, TPM1, OFD1, PPP1R9A, PDPK1, PFN2, MAST1, ANK1, EPB41L1, ANK3, OPHN1, MYH10, ADD1, SGCB, TMOD1
9	1.85	5	regulation of lipase activity|	Common variants at 30 loci contribute to polygenic dyslipidemia	0.0115908	Common variants at 30 loci contribute to polygenic dyslipidemia|GO:0060191~regulation of lipase activity|Common variants at 30 loci contribute to polygenic dyslipidemia|GO:0051004~regulation of lipoprotein lipase activity|	APOA4, APOA5, ABCA1, LIPC, ANGPTL4
10	1.75	8	Tight junction	Tight junction	6.54197e-05	Tight junction|SM00072:GuKc|IPR008145:Guanylate kinase/L-type calcium channel region|IPR008144:Guanylate kinase|domain:Guanylate kinase-like|Tight junction|	MAGI3, CGN, WNK4, ASH1L, CNKSR3, CLDN1, MPP7, PARD3B
11	1.73	10	steroid metabolic process|lipid transport	GO:0008202~steroid metabolic process	0.011004	GO:0008202~steroid metabolic process|GO:0042157~lipoprotein metabolic process|lipid transport|GO:0055092~sterol homeostasis|GO:0042632~cholesterol homeostasis|GO:0030301~cholesterol transport|GO:0015918~sterol transport|GO:0016125~sterol metabolic process|lipid metabolism|GO:0008203~cholesterol metabolic process|GO:0034364~high-density lipoprotein particle|GO:0034367~macromolecular complex remode…	APOA4, CYP17A1, UGT2B17, STS, SORL1, PBX1, ABCA1, UGT2B15, LIPC, FDFT1
12	1.59	16	DNA replication	GO:0006259~DNA metabolic process	0.0410118	GO:0006259~DNA metabolic process|GO:0006261~DNA-dependent DNA replication|GO:0006259~DNA metabolic process|dna replication|GO:0006260~DNA replication|	ATF7IP, C9ORF102, CCDC88A, SMG6, C11ORF30, NOL8, CYCS, PPFIBP1, IGF1, NFIX, PURA, POLD3, RFC1, ORC4L, NFIA, MED1
13	1.57	8	lipid transport	GO:0006869~lipid transport	0.0161067	GO:0006869~lipid transport|GO:0005319~lipid transporter activity|GO:0005548~phospholipid transporter activity|GO:0010876~lipid localization|GO:0006869~lipid transport|GO:0015914~phospholipid transport|	APOA4, P2RX7, SORL1, APOA5, ATP11B, ATP11A, ABCA1, LIPC
14	1.55	17	positive regulation of hydrolase activity	GO:0043085~positive regulation of catalytic activity	0.0265014	GO:0043085~positive regulation of catalytic activity|GO:0051345~positive regulation of hydrolase activity|GO:0043085~positive regulation of catalytic activity|GO:0051336~regulation of hydrolase activity|	PTPRC, CCDC88A, CYCS, DOCK7, IGF2, TPM1, APOA4, CCND1, MAP4K5, P2RX7, PDPK1, UACA, SYDE2, P2RY1, APOA5, PRKD3, GHR
15	1.52	29	endoplasmic reticulum	GO:0005783~endoplasmic reticulum	0.00600543	GO:0005783~endoplasmic reticulum|GO:0000267~cell fraction|GO:0031090~organelle membrane|GO:0005626~insoluble fraction|GO:0005624~membrane fraction|endoplasmic reticulum|GO:0012505~endomembrane system|GO:0042175~nuclear envelope-endoplasmic reticulum network|GO:0005789~endoplasmic reticulum membrane|GO:0044432~endoplasmic reticulum part|GO:0005783~endoplasmic reticulum|GO:0042598~vesicular fractio…	SEC24B, EDEM1, FKBP1B, FDFT1, APOA4, ANK1, ANK3, FMO2, PGRMC1, PHTF2, PHTF1, ASPH, STS, CCDC88A, NOS1, LPGAT1, IGF2, CYP1A2, CYP4X1, CYP17A1, UGT2B17, DGAT1, SULF2, DGAT2, H6PD, MOSPD2, UGT2B15, EDA, SEL1L

## Sheet: Table S5E
Table S5E - This sheet lists the enriched functional clusters identified by DAVID (enrichment score >1.5) for rat liver sex-biased genes whose expression is altered by hypophysectomy and also show sex-bias in human liver.
Clusters	Enrichment score	Cluster gene count	Generalized term	Top term	Top term P_value	All terms in the cluster	Genes in the cluster
1	2.56	6	glycerolipid metabolic process	GO:0046486~glycerolipid metabolic process	0.00759262	GO:0046486~glycerolipid metabolic process|GO:0046486~glycerolipid metabolic process|GO:0006662~glycerol ether metabolic process|GO:0006639~acylglycerol metabolic process|GO:0006641~triglyceride metabolic process|GO:0018904~organic ether metabolic process|GO:0006638~neutral lipid metabolic process|	APOA4, DGAT2, ALDH5A1, APOA5, PLA1A, GPAM
2	2.33	8	steroid metabolic process	GO:0008202~steroid metabolic process	0.000831973	GO:0008202~steroid metabolic process|GO:0044432~endoplasmic reticulum part|cholesterol metabolism|GO:0016125~sterol metabolic process|GO:0008203~cholesterol metabolic process|steroid metabolism|GO:0008202~steroid metabolic process|lipid metabolism|	APOA4, CYP17A1, STS, SQLE, AKR1B10, CYP7A1, SORL1, INSIG1
3	2.24	16	cell fraction	GO:0000267~cell fraction	0.00747773	GO:0000267~cell fraction|GO:0000267~cell fraction|GO:0042598~vesicular fraction|GO:0005792~microsome|GO:0005626~insoluble fraction|GO:0005624~membrane fraction|	STS, MPDZ, ALDH5A1, SNCA, ABCB1, CYP1A2, SLC3A1, BCL2L11, P2RX7, KRAS, DGAT2, SQLE, CYP7A1, GPX3, CPD, PPP3CA
4	2.03	23	transcription factor activity	GO:0006350~transcription	0.064652	GO:0006350~transcription|GO:0006350~transcription|GO:0030528~transcription regulator activity|GO:0003702~RNA polymerase II transcription factor activity|GO:0003700~transcription factor activity|GO:0032774~RNA biosynthetic process|GO:0006351~transcription, DNA-dependent|GO:0006366~transcription from RNA polymerase II promoter|	SCML4, PPARA, TBL1XR1, CCRN4L, MLL, ONECUT1, ARID4A, ZNF644, RYBP, BMPR2, NFIX, RORA, TLE2, HLTF, CITED2, ASCL1, PHTF2, PHTF1, MNT, ETV1, NR2F2, RUNX1, MED1
5	1.93	6	chemical homeostasis	GO:0046486~glycerolipid metabolic process	0.00759262	GO:0046486~glycerolipid metabolic process|GO:0006650~glycerophospholipid metabolic process|GO:0019637~organophosphate metabolic process|GO:0006644~phospholipid metabolic process|GO:0046486~glycerolipid metabolic process|GO:0006638~neutral lipid metabolic process|	APOA4, DGAT2, ALDH5A1, APOA5, PLA1A, GPAM
6	1.92	7	lipid transport	GO:0006869~lipid transport	0.000791324	GO:0006869~lipid transport|GO:0051336~regulation of hydrolase activity|GO:0008289~lipid binding|GO:0042157~lipoprotein metabolic process|GO:0019216~regulation of lipid metabolic process|GO:0045834~positive regulation of lipid metabolic process|GO:0009894~regulation of catabolic process|GO:0015914~phospholipid transport|GO:0050994~regulation of lipid catabolic process|GO:0031329~regulation of cell…	APOA4, PPARA, P2RX7, APOC4, SORL1, APOA5, ATP11A
7	1.9	8	glycerolipid metabolic process	GO:0048878~chemical homeostasis	0.0918453	GO:0048878~chemical homeostasis|GO:0048878~chemical homeostasis|GO:0005319~lipid transporter activity|Common variants at 30 loci contribute to polygenic dyslipidemia|GO:0055088~lipid homeostasis|Six new loci associated with blood low-density lipoprotein cholesterol, high-density lipoprotein cholesterol or triglycerides in humans|Newly identified loci that influence lipid concentrations and risk o…	APOA4, PTPRC, P2RX7, APOC4, SNCA, APOA5, IGF1, PPP3CA
8	1.85	15	oxidation reduction	GO:0055114~oxidation reduction	0.000302555	GO:0055114~oxidation reduction|GO:0012505~endomembrane system|GO:0042175~nuclear envelope-endoplasmic reticulum network|GO:0005789~endoplasmic reticulum membrane|GO:0044432~endoplasmic reticulum part|Monooxygenase|GO:0046906~tetrapyrrole binding|GO:0020037~heme binding|IPR017972:Cytochrome P450, conserved site|IPR001128:Cytochrome P450|IPR017973:Cytochrome P450, C-terminal region|transmembrane pr…	ALDH5A1, SNCA, CYCS, ADH7, CYP1A2, PHYH, CYB561, HADHA, GPX2, CYP17A1, SQLE, CYP7A1, AKR1B10, GPX3, BCO2
9	1.71	6	Proto-oncogene|chromosomal rearrangement	Proto-oncogene	0.0137578	Proto-oncogene|chromosomal rearrangement|Proto-oncogene|fusion protein|	RET, CCND1, MLL, KRAS, ETV1, RUNX1
10	1.67	33	nucleus	nucleus	0.124229	nucleus|GO:0051252~regulation of RNA metabolic process|nucleus|GO:0006355~regulation of transcription, DNA-dependent|GO:0045449~regulation of transcription|GO:0043565~sequence-specific DNA binding|GO:0006350~transcription|GO:0030528~transcription regulator activity|GO:0016563~transcription activator activity|GO:0003700~transcription factor activity|transcription regulation|dna-binding|GO:0003677~…	SCML4, PPARA, ARID4A, ONECUT1, RAD23A, SNCA, NFIX, RORA, CITED2, PHTF2, PHTF1, ETV1, PPP3CA, NR2F2, RUNX1, ASPM, TBL1XR1, MLL, ZNF644, SMG6, RYBP, ESPL1, TLE2, CSRP2, HLTF, ATRX, POLD3, ASCL1, HSPA4L, MNT, RAD54L2, KPNA3, MED1

## Sheet: Table S5F
Table S5F- This sheet lists the enriched functional clusters identified by DAVID (enrichment score >1.5) for common sex-biased genes in human, mouse and rat liver.
Clusters	Enrichment score	Cluster gene count	Generalized term	Top term	Top term P_value	All terms in the cluster	Genes in the cluster
1	2.89	6	glycerolipid metabolic process	GO:0046486~glycerolipid metabolic process	0.00159478	GO:0046486~glycerolipid metabolic processGO:0006662~glycerol ether metabolic process|GO:0006638~neutral lipid metabolic process|GO:0006639~acylglycerol metabolic process|GO:0046486~glycerolipid metabolic process|GO:0006641~triglyceride metabolic process|GO:0018904~organic ether metabolic process|	APOA4, DGAT2, ALDH5A1, APOA5, PLA1A, GPAM
2	2.16	6	steroid metabolic process	GO:0008202~steroid metabolic process	0.00414285	GO:0008202~steroid metabolic process|steroid metabolism|lipid metabolism|GO:0008202~steroid metabolic process|	APOA4, CYP17A1, STS, CYP7A1, SORL1, PBX1
3	1.89	12	endomembrane system	GO:0005783~endoplasmic reticulum	0.0106934	GO:0005783~endoplasmic reticulumGO:0012505~endomembrane system|nadp|GO:0031090~organelle membrane|transmembrane protein|GO:0042175~nuclear envelope-endoplasmic reticulum network|GO:0005789~endoplasmic reticulum membrane|hsa00140:Steroid hormone biosynthesis|GO:0046906~tetrapyrrole binding|IPR017972:Cytochrome P450, conserved site|GO:0009055~electron carrier activity|IPR001128:Cytochrome P450|GO:0…	APOA4, CYP17A1, STS, DGAT2, SULF2, H6PD, CYP7A1, FMO2, PHTF2, PHTF1, TLR3, CYP1A2
4	1.85	6	transcription regulation	chromosomal rearrangement	0.00753481	chromosomal rearrangementGO:0051099~positive regulation of binding|GO:0043388~positive regulation of DNA binding|GO:0051091~positive regulation of transcription factor activity|GO:0051092~positive regulation of NF-kappaB transcription factor activity|Proto-oncogene|GO:0051090~regulation of transcription factor activity|GO:0051098~regulation of binding|chromosomal rearrangement|GO:0051101~regulati…	CCND1, MLL, BRD3, RUNX1T1, PBX1, ERC1
5	1.78	8	extracellular space|lipid transport	GO:0044421~extracellular region part	0.236363	GO:0044421~extracellular region partGO:0044421~extracellular region part|GO:0005615~extracellular space|lipid transport|GO:0032994~protein-lipid complex|GO:0034358~plasma lipoprotein particle|GO:0015914~phospholipid transport|GO:0010876~lipid localization|GO:0006869~lipid transport|	APOA4, MBL2, LAMA3, APCS, SULF2, SORL1, APOA5, IGF1
6	1.6	6	steroid and cholesterol metabolic process	GO:0008202~steroid metabolic process	0.00414285	GO:0008202~steroid metabolic processGO:0016125~sterol metabolic process|GO:0008203~cholesterol metabolic process|GO:0008202~steroid metabolic process|	APOA4, CYP17A1, STS, CYP7A1, SORL1, PBX1
7	1.59	6	glycerolipid metabolic process	GO:0046486~glycerolipid metabolic process	0.00159478	GO:0046486~glycerolipid metabolic processGO:0006650~glycerophospholipid metabolic process|GO:0019637~organophosphate metabolic process|GO:0006644~phospholipid metabolic process|GO:0046486~glycerolipid metabolic process|	APOA4, DGAT2, ALDH5A1, APOA5, PLA1A, GPAM
8	1.5	9	protein dimerization activity	GO:0046983~protein dimerization activity	0.0108672	GO:0046983~protein dimerization activityGO:0042802~identical protein binding|GO:0042803~protein homodimerization activity|GO:0046983~protein dimerization activity|	APOA4, P2RX7, MLL, PTPRE, ALDH5A1, RUNX1T1, PBX1, PPP3CA, RRAGD
